# Supplementary material
Source: PubMed Central journal article supplement (PMC7126412)
Supplement: mmc2.pdf [file mmc2.pdf]

## Recognition of adenine binding sites by searching the ASTRAL dataset.

The Table presents a list of proteins (top 400) whose binding sites were recognized to be similar to the adenine binding site of the c-AMP-dependent protein kinase (1atp). The proteins are listed in order of decreasing similarity to the query binding site.

| Rank | PDB code | Match Score | t-score | p-value | SCOP Family | SCOP Remarks                                                       |
|------|----------|-------------|---------|---------|-------------|--------------------------------------------------------------------|
| 1    | 1atpE    | 100         | 203     | 0.02    | 88854       | complexed with atp, mn, pho                                        |
| 2    | 1o6lA    | 77          | 147     | 0.55    | 88854       | complexed with anp, mn, tpo; mutant                                |
| 3    | 1apmE    | 75          | 143     | 0.59    | 88854       | complexed with oct, pho; mutant                                    |
| 4    | 1csn     | 68          | 126     | 0.75    | 88854       | complexed with atp, mg, so4                                        |
| 5    | 1o6yA    | 66          | 121     | 0.80    | 88854       | complexed with acp, mg                                             |
| 6    | 1jksA    | 63          | 114     | 0.87    | 88854       | None                                                               |
| 7    | 1phk     | 57          | 99      | 1.01    | 88854       | complexed with atp, mn                                             |
| 8    | 1h1wA    | 57          | 99      | 1.01    | 88854       | complexed with atp, gol, sep, so4                                  |
| 9    | 1nvrA    | 56          | 97      | 1.03    | 88854       | complex with peptide, chain B                                      |
| 10   | 1fmk     | 56          | 97      | 1.03    | 50045       | None                                                               |
| 11   | 1m2rA    | 55          | 94      | 1.05    | 88854       | complexed with mny                                                 |
| 12   | 1b6cB    | 54          | 92      | 1.07    | 88854       | None                                                               |
| 13   | 1omwA    | 52          | 87      | 1.12    | 48098       | complexed with cmt; mutant                                         |
| 14   | 1dxcC    | 52          | 87      | 1.12    | 48707       | complexed with bcb, bpb, fe2, hec, lda, mq9, mst, ns5, so4; mutant |
| 15   | 1kblA    | 51          | 85      | 1.14    | 51629       | complexed with nh4, so4                                            |
| 16   | 1j7lA    | 50          | 82      | 1.17    | 64411       | None                                                               |
| 17   | 1cjaA    | 50          | 82      | 1.17    | 56168       | None                                                               |
| 18   | 1jr3A    | 50          | 82      | 1.17    | 48020       | None                                                               |
| 19   | 1iqpA    | 50          | 82      | 1.17    | 48020       | None                                                               |
| 20   | 1sur     | 48          | 78      | 1.21    | 52410       | None                                                               |
| 21   | 1fgkA    | 47          | 75      | 1.23    | 88854       | None                                                               |
| 22   | 1d0cA    | 47          | 75      | 1.23    | 56513       | None                                                               |
| 23   | 1kwpA    | 47          | 75      | 1.23    | 88854       | None                                                               |
| 24   | 1gz8A    | 46          | 73      | 1.26    | 88854       | complexed with csw, mbp                                            |
| 25   | 1n7dA    | 46          | 73      | 1.26    | 63826       | complexed with ca, keg, man, nag; mutant                           |
| 26   | 3pmgA    | 46          | 73      | 1.26    | 53739       | None                                                               |
| 27   | 1n91A    | 46          | 73      | 1.26    | 69787       | structural genomics                                                |
| 28   | 1h29A    | 46          | 73      | 1.26    | 48696       | None                                                               |
| 29   | 1a8i     | 46          | 73      | 1.26    | 53766       | complexed with gls                                                 |
| 30   | 1dn0B    | 46          | 73      | 1.26    | 48727       | None                                                               |
| 31   | 1iow     | 46          | 73      | 1.26    | 52452       | complexed with adp, mg, phy; mutant                                |
| 32   | 1fioA    | 45          | 70      | 1.28    | 47662       | complexed with zn                                                  |
| 33   | 1ep3A    | 45          | 70      | 1.28    | 51396       | complexed with fad, fes, fmn                                       |
| 34   | 1f8rA    | 45          | 70      | 1.28    | 51913       | None                                                               |
| 35   | 1ni4B    | 45          | 70      | 1.28    | 88741       | None                                                               |
| 36   | 1ihuA    | 45          | 70      | 1.28    | 52652       | None                                                               |
| 37   | 1ewfA    | 45          | 70      | 1.28    | 55395       | None                                                               |
| 38   | 1mxiA    | 45          | 70      | 1.28    | 75218       | complexed with iod, sah                                            |

|    |       |    |    |      |       |                                        |
|----|-------|----|----|------|-------|----------------------------------------|
| 39 | 1dgtB | 45 | 70 | 1.28 | 47786 | complexed with amp, zn                 |
| 40 | 1lla  | 45 | 70 | 1.28 | 48051 | complexed with cl, cu, na              |
| 41 | 1b16A | 45 | 70 | 1.28 | 51751 | None                                   |
| 42 | 1iw7D | 45 | 70 | 1.28 | 64490 | None                                   |
| 43 | 1gkuB | 45 | 70 | 1.28 | 69496 | None                                   |
| 44 | 1fm4A | 45 | 70 | 1.28 | 55962 | complexed with dho                     |
| 45 | 1lfpA | 45 | 70 | 1.28 | 75626 | structural genomics                    |
| 46 | 1mt5A | 45 | 70 | 1.28 | 75305 | None                                   |
| 47 | 1cpq  | 45 | 70 | 1.28 | 47179 | complexed with hem                     |
| 48 | 1eulA | 45 | 70 | 1.28 | 81652 | complexed with ca                      |
| 49 | 1fftA | 45 | 70 | 1.28 | 81441 | None                                   |
| 50 | 2tpsA | 45 | 70 | 1.28 | 51392 | None                                   |
| 51 | 1n9lA | 45 | 70 | 1.28 | 88853 | complexed with fmm, sul                |
| 52 | 1qkmA | 44 | 68 | 1.30 | 48509 | complex with partial agonist genistein |
| 53 | 1c52  | 44 | 68 | 1.30 | 46627 | complexed with hem                     |
| 54 | 2hgsA | 44 | 68 | 1.30 | 52460 | complexed with adp, gsh, mg, sul       |
| 55 | 1oedC | 44 | 68 | 1.30 | 90113 | None                                   |
| 56 | 1ju2A | 44 | 68 | 1.30 | 51913 | None                                   |
| 57 | 1o2dA | 44 | 68 | 1.30 | 69892 | None                                   |
| 58 | 1ezvC | 44 | 68 | 1.30 | 81647 | complexed with fes, hem, sma, uq6      |
| 59 | 1lrhA | 44 | 68 | 1.30 | 51187 | None                                   |
| 60 | 1c75A | 44 | 68 | 1.30 | 46627 | complexed with hem                     |
| 61 | 1fo4A | 44 | 68 | 1.30 | 47742 | None                                   |
| 62 | 1qb7A | 44 | 68 | 1.30 | 53272 | complexed with ade, cit, mg            |
| 63 | 1hrkA | 44 | 68 | 1.30 | 53801 | None                                   |
| 64 | 1plzA | 44 | 68 | 1.30 | 89403 | complexed with mse; mutant             |
| 65 | 1lldA | 44 | 68 | 1.30 | 51848 | None                                   |
| 66 | 1qs0A | 44 | 68 | 1.30 | 88766 | complexed with hri, mg, tdp            |
| 67 | 1jy5A | 44 | 68 | 1.30 | 55896 | None                                   |
| 68 | 1okeA | 44 | 68 | 1.30 | 81284 | None                                   |
| 69 | 1og6A | 44 | 68 | 1.30 | 51431 | None                                   |
| 70 | 1n5uA | 44 | 68 | 1.30 | 48553 | None                                   |
| 71 | 1iknD | 44 | 68 | 1.30 | 48404 | None                                   |
| 72 | 1qh4A | 44 | 68 | 1.30 | 48035 | None                                   |
| 73 | 1jboB | 44 | 68 | 1.30 | 46532 | complexed with cyc, men                |
| 74 | 1c8dA | 44 | 68 | 1.30 | 88646 | complexed with ca                      |
| 75 | 1byb  | 44 | 68 | 1.30 | 51446 | complexed with glc, so4                |
| 76 | 1qkrA | 44 | 68 | 1.30 | 47221 | None                                   |
| 77 | 1f3lA | 44 | 68 | 1.30 | 53351 | complexed with sah                     |
| 78 | 1n7hA | 44 | 68 | 1.30 | 51751 | None                                   |
| 79 | 1d7yA | 44 | 68 | 1.30 | 51943 | None                                   |
| 80 | 1cliA | 44 | 68 | 1.30 | 55327 | None                                   |
| 81 | 1ja9A | 44 | 68 | 1.30 | 51751 | complexed with ndp, pyq                |
| 82 | 1gyoA | 44 | 68 | 1.30 | 48696 | None                                   |
| 83 | 1kekA | 44 | 68 | 1.30 | 88746 | None                                   |
| 84 | 1aco  | 44 | 68 | 1.30 | 52017 | complexed with fs4, tra                |
| 85 | 1hmnA | 44 | 68 | 1.30 | 69547 | None                                   |
| 86 | 2rspA | 44 | 68 | 1.30 | 50631 | None                                   |

|     |       |    |    |      |       |                                            |
|-----|-------|----|----|------|-------|--------------------------------------------|
| 87  | 1jalA | 44 | 68 | 1.30 | 52592 | None                                       |
| 88  | 1eno  | 44 | 68 | 1.30 | 51751 | complexed with nad; mutant                 |
| 89  | 1mkiA | 44 | 68 | 1.30 | 90084 | None                                       |
| 90  | 1hh5A | 44 | 68 | 1.30 | 48696 | complexed with hec                         |
| 91  | 19hcA | 44 | 68 | 1.30 | 48696 | None                                       |
| 92  | 1m1xB | 44 | 68 | 1.30 | 69180 | complexed with mn, nag                     |
| 93  | 1gw0A | 44 | 68 | 1.30 | 49550 | None                                       |
| 94  | 1jyeA | 44 | 68 | 1.30 | 53823 | complexed with gol; mutant                 |
| 95  | 1nrwA | 43 | 66 | 1.33 | 82388 | structural genomics                        |
| 96  | 1od2A | 43 | 66 | 1.33 | 89572 | None                                       |
| 97  | 1n97A | 43 | 66 | 1.33 | 48265 | None                                       |
| 98  | 1tgoA | 43 | 66 | 1.33 | 53118 | None                                       |
| 99  | 1m98A | 43 | 66 | 1.33 | 81931 | None                                       |
| 100 | 1ew0A | 43 | 66 | 1.33 | 55789 | complexed with hem                         |
| 101 | 1oahA | 43 | 66 | 1.33 | 48711 | None                                       |
| 102 | 1d8cA | 43 | 66 | 1.33 | 51646 | None                                       |
| 103 | 1l5aA | 43 | 66 | 1.33 | 75229 | None                                       |
| 104 | 1qbkB | 43 | 66 | 1.33 | 48372 | complexed with gnp, mg                     |
| 105 | 1n62C | 43 | 66 | 1.33 | 55448 | None                                       |
| 106 | 1jqnA | 43 | 66 | 1.33 | 51632 | complexed with asp, dco, mn                |
| 107 | 1gz5A | 43 | 66 | 1.33 | 82540 | None                                       |
| 108 | 1bvsA | 43 | 66 | 1.33 | 46930 | None                                       |
| 109 | 1f44A | 43 | 66 | 1.33 | 47824 | mutant                                     |
| 110 | 1mdaH | 43 | 66 | 1.33 | 50970 | None                                       |
| 111 | 1lp3A | 43 | 66 | 1.33 | 88646 | None                                       |
| 112 | 1d2nA | 43 | 66 | 1.33 | 81269 | complexed with anp, gol, mg                |
| 113 | 1thfD | 43 | 66 | 1.33 | 51367 | complexed with po4                         |
| 114 | 1e3hA | 43 | 66 | 1.33 | 46916 | complexed with so4                         |
| 115 | 3btaA | 43 | 66 | 1.33 | 49956 | complexed with zn                          |
| 116 | 1kgyA | 43 | 66 | 1.33 | 49800 | None                                       |
| 117 | 1o7nA | 43 | 66 | 1.33 | 50033 | complexed with edo, fe, fes, ind, oxy, so4 |
| 118 | 1cydA | 43 | 66 | 1.33 | 51751 | None                                       |
| 119 | 1aye  | 43 | 66 | 1.33 | 53188 | procarboxypeptidase A2                     |
| 120 | 1an9A | 43 | 66 | 1.33 | 51979 | None                                       |
| 121 | 1nw3A | 43 | 66 | 1.33 | 89746 | complexed with act, sam, so4               |
| 122 | 1l3lA | 43 | 66 | 1.33 | 46900 | None                                       |
| 123 | 1it2A | 43 | 66 | 1.33 | 46463 | None                                       |
| 124 | 3cyr  | 43 | 66 | 1.33 | 48696 | complexed with hem                         |
| 125 | 2shpA | 43 | 66 | 1.33 | 52805 | None                                       |
| 126 | 1gg3A | 43 | 66 | 1.33 | 47032 | None                                       |
| 127 | 1muoA | 43 | 66 | 1.33 | 88854 | complexed with adn                         |
| 128 | 1ng4A | 43 | 66 | 1.33 | 51913 | None                                       |
| 129 | 1azsC | 43 | 66 | 1.33 | 47896 | complexed with fkp, gsp, mg; mutant        |
| 130 | 1qs1A | 43 | 66 | 1.33 | 56400 | None                                       |
| 131 | 1dl6A | 43 | 66 | 1.33 | 57784 | complexed with zn                          |
| 132 | 1h0hA | 43 | 66 | 1.33 | 50696 | None                                       |
| 133 | 1ezvB | 43 | 66 | 1.33 | 63412 | None                                       |

|     |       |    |    |      |       |                                                                                 |
|-----|-------|----|----|------|-------|---------------------------------------------------------------------------------|
| 134 | 1lfo  | 43 | 66 | 1.33 | 50847 | complexed with ace, beo, ola, unx                                               |
| 135 | 1bgxT | 43 | 66 | 1.33 | 47808 | None                                                                            |
| 136 | 1kzkA | 43 | 66 | 1.33 | 50631 | None                                                                            |
| 137 | 1mkyA | 43 | 66 | 1.33 | 52592 | None                                                                            |
| 138 | 1e8gA | 43 | 66 | 1.33 | 55104 | None                                                                            |
| 139 | 1pswA | 43 | 66 | 1.33 | 89784 | structural genomics                                                             |
| 140 | 1h32A | 43 | 66 | 1.33 | 81677 | None                                                                            |
| 141 | 1mnaA | 43 | 66 | 1.33 | 69584 | None                                                                            |
| 142 | 1kssA | 43 | 66 | 1.33 | 48711 | complexed with fad, fum, hem, na; mutant                                        |
| 143 | 1mx1A | 43 | 66 | 1.33 | 53475 | None                                                                            |
| 144 | 1lv2A | 43 | 66 | 1.33 | 48509 | complexed with plm                                                              |
| 145 | 1l4sA | 43 | 66 | 1.33 | 69755 | None                                                                            |
| 146 | 1bx4A | 43 | 66 | 1.33 | 53614 | complexed with adn, cl, mo4, mo6                                                |
| 147 | 1qaxA | 43 | 66 | 1.33 | 55036 | None                                                                            |
| 148 | 1jroB | 43 | 66 | 1.33 | 54666 | None                                                                            |
| 149 | 1m1qA | 43 | 66 | 1.33 | 48711 | complexed with hem, sul                                                         |
| 150 | 1cid  | 43 | 66 | 1.33 | 48727 | complexed with so4                                                              |
| 151 | 1kk8A | 43 | 66 | 1.33 | 50085 | complexed with adp, bef, ca, gol, mg; mutant                                    |
| 152 | 1mj3A | 43 | 66 | 1.33 | 52103 | None                                                                            |
| 153 | 1g291 | 43 | 66 | 1.33 | 50338 | None                                                                            |
| 154 | 1oacA | 43 | 66 | 1.33 | 49999 | None                                                                            |
| 155 | 1ea9C | 43 | 66 | 1.33 | 81282 | None                                                                            |
| 156 | 1m0wA | 42 | 63 | 1.35 | 52460 | None                                                                            |
| 157 | 1i5zA | 42 | 63 | 1.35 | 46796 | None                                                                            |
| 158 | 1bjbA | 42 | 63 | 1.35 | 49159 | a single-chain construct with epsilon chain domain, includes part of the linker |
| 159 | 1kv3A | 42 | 63 | 1.35 | 81289 | None                                                                            |
| 160 | 1g5gA | 42 | 63 | 1.35 | 69923 | None                                                                            |
| 161 | 1dgsA | 42 | 63 | 1.35 | 47786 | None                                                                            |
| 162 | 1mdbA | 42 | 63 | 1.35 | 56802 | complexed with amp, dbh, so4                                                    |
| 163 | 1eqgA | 42 | 63 | 1.35 | 48132 | None                                                                            |
| 164 | 1efvB | 42 | 63 | 1.35 | 52432 | complexed with amp, fad                                                         |
| 165 | 2prgA | 42 | 63 | 1.35 | 48509 | None                                                                            |
| 166 | 1ns5A | 42 | 63 | 1.35 | 82371 | None                                                                            |
| 167 | 1acc  | 42 | 63 | 1.35 | 56989 | complexed with ca                                                               |
| 168 | 1ft5A | 42 | 63 | 1.35 | 48711 | complexed with hem, ips                                                         |
| 169 | 1ofdA | 42 | 63 | 1.35 | 69337 | None                                                                            |
| 170 | 1j3bA | 42 | 63 | 1.35 | 53796 | None                                                                            |
| 171 | 1rgs  | 42 | 63 | 1.35 | 51210 | None                                                                            |
| 172 | 1k24A | 42 | 63 | 1.35 | 75651 | complexed with 1pe, zn                                                          |
| 173 | 1ocrB | 42 | 63 | 1.35 | 49541 | None                                                                            |
| 174 | 1nni1 | 42 | 63 | 1.35 | 89590 | structural genomics                                                             |
| 175 | 1eg3A | 42 | 63 | 1.35 | 47547 | None                                                                            |
| 176 | 1fgjA | 42 | 63 | 1.35 | 48711 | None                                                                            |
| 177 | 1jymA | 42 | 63 | 1.35 | 56421 | None                                                                            |

|     |       |    |    |      |       |                                                |
|-----|-------|----|----|------|-------|------------------------------------------------|
| 178 | 1jjuA | 42 | 63 | 1.35 | 68956 | None                                           |
| 179 | 1ihkA | 42 | 63 | 1.35 | 50354 | complexed with po4                             |
| 180 | 1cxA  | 42 | 63 | 1.35 | 54602 | None                                           |
| 181 | 1g8pA | 42 | 63 | 1.35 | 81269 | CASP4                                          |
| 182 | 1efuB | 42 | 63 | 1.35 | 63423 | None                                           |
| 183 | 2pia  | 42 | 63 | 1.35 | 63381 | complexed with fes, fmn                        |
| 184 | 1pvdA | 42 | 63 | 1.35 | 52475 | None                                           |
| 185 | 1kbiA | 42 | 63 | 1.35 | 51396 | complexed with fmn, hem, mpd, po4,<br>pyr      |
| 186 | 1cx4A | 42 | 63 | 1.35 | 51210 | None                                           |
| 187 | 1mumA | 42 | 63 | 1.35 | 88704 | None                                           |
| 188 | 1d3gA | 42 | 63 | 1.35 | 51396 | complexed with act, bre, ddq, fmn, oro,<br>so4 |
| 189 | 1fk5A | 42 | 63 | 1.35 | 47700 | complexed with fmt, ola                        |
| 190 | 1qm9A | 42 | 63 | 1.35 | 54929 | None                                           |
| 191 | 1onfA | 42 | 63 | 1.35 | 51943 | None                                           |
| 192 | 2btvA | 42 | 63 | 1.35 | 56832 | None                                           |
| 193 | 1ky9A | 42 | 63 | 1.35 | 74933 | None                                           |
| 194 | 1p4oA | 42 | 63 | 1.35 | 88854 | None                                           |
| 195 | 1inp  | 42 | 63 | 1.35 | 56656 | complexed with mg                              |
| 196 | 1hr6B | 42 | 63 | 1.35 | 63412 | None                                           |
| 197 | 1e0tA | 42 | 63 | 1.35 | 50801 | None                                           |
| 198 | 1l7vA | 42 | 63 | 1.35 | 75648 | None                                           |
| 199 | 1ei1A | 42 | 63 | 1.35 | 54224 | None                                           |
| 200 | 1pme  | 42 | 63 | 1.35 | 88854 | complexed with 577, so4; mutant                |
| 201 | 1fepA | 42 | 63 | 1.35 | 56948 | None                                           |
| 202 | 1d0nA | 42 | 63 | 1.35 | 55754 | None                                           |
| 203 | 1ldjA | 42 | 63 | 1.35 | 74679 | complexed with zn                              |
| 204 | 1h2kA | 42 | 63 | 1.35 | 82194 | complex with HIF-1 alpha fragment<br>peptide   |
| 205 | 1jr7A | 42 | 63 | 1.35 | 63855 | complexed with fe2                             |
| 206 | 1f4lA | 42 | 63 | 1.35 | 47324 | complexed with met, zn                         |
| 207 | 1nar  | 42 | 63 | 1.35 | 51534 | X-ray sequence                                 |
| 208 | 1f1eA | 42 | 63 | 1.35 | 47129 | complexed with cl                              |
| 209 | 1a0p  | 42 | 63 | 1.35 | 47824 | None                                           |
| 210 | 1h1oA | 42 | 63 | 1.35 | 46680 | None                                           |
| 211 | 1opoA | 42 | 63 | 1.35 | 88643 | None                                           |
| 212 | 7reqA | 42 | 63 | 1.35 | 51704 | None                                           |
| 213 | 1g8mA | 42 | 63 | 1.35 | 63971 | None                                           |
| 214 | 1fbvA | 42 | 63 | 1.35 | 47547 | complexed with so4, zn                         |
| 215 | 1qpcA | 42 | 63 | 1.35 | 88854 | complexed with anp, edo, so4                   |
| 216 | 1tubB | 42 | 63 | 1.35 | 52491 | complexed with gdp, gtp, txl                   |
| 217 | 1gw5B | 42 | 63 | 1.35 | 74771 | complexed with ihp                             |
| 218 | 1i8oA | 42 | 63 | 1.35 | 46627 | complexed with hec, nh3, sul                   |
| 219 | 1b5tA | 42 | 63 | 1.35 | 51731 | None                                           |
| 220 | 1eur  | 42 | 63 | 1.35 | 50940 | None                                           |
| 221 | 1a9xA | 42 | 63 | 1.35 | 48109 | None                                           |
| 222 | 1edoA | 42 | 63 | 1.35 | 51751 | complexed with nap                             |

|     |       |    |    |      |       |                                                                                                           |
|-----|-------|----|----|------|-------|-----------------------------------------------------------------------------------------------------------|
| 223 | 1gcvA | 42 | 63 | 1.35 | 46463 | None                                                                                                      |
| 224 | 1e8cA | 42 | 63 | 1.35 | 63419 | None                                                                                                      |
| 225 | 1ejdA | 42 | 63 | 1.35 | 55209 | None                                                                                                      |
| 226 | 1vns  | 42 | 63 | 1.35 | 48325 | complexed with so4                                                                                        |
| 227 | 1eg7A | 42 | 63 | 1.35 | 52652 | None                                                                                                      |
| 228 | 1jjiA | 42 | 63 | 1.35 | 53487 | None                                                                                                      |
| 229 | 1gm5A | 42 | 63 | 1.35 | 69009 | complexed with adp, mg                                                                                    |
| 230 | 1e5qA | 42 | 63 | 1.35 | 51800 | None                                                                                                      |
| 231 | 1a06  | 42 | 63 | 1.35 | 88854 | None                                                                                                      |
| 232 | 1dmhA | 42 | 63 | 1.35 | 49483 | None                                                                                                      |
| 233 | 1aozA | 42 | 63 | 1.35 | 49550 | None                                                                                                      |
| 234 | 1o97C | 42 | 63 | 1.35 | 52432 | complexed with amp, fad                                                                                   |
| 235 | 1et9A | 42 | 63 | 1.35 | 50219 | None                                                                                                      |
| 236 | 1o8bA | 42 | 63 | 1.35 | 75176 | None                                                                                                      |
| 237 | 1qdmA | 42 | 63 | 1.35 | 47866 | None                                                                                                      |
| 238 | 1jeyA | 42 | 63 | 1.35 | 64502 | None                                                                                                      |
| 239 | 1zakA | 42 | 63 | 1.35 | 52541 | None                                                                                                      |
| 240 | 1o8aA | 42 | 63 | 1.35 | 55505 | complexed with act, cl, nag, ndg, nxa,<br>zn                                                              |
| 241 | 1a6dA | 42 | 63 | 1.35 | 48596 | None                                                                                                      |
| 242 | 1n9pA | 42 | 63 | 1.35 | 81966 | complexed with mse                                                                                        |
| 243 | 1qlaA | 42 | 63 | 1.35 | 46978 | None                                                                                                      |
| 244 | 1lqvA | 42 | 63 | 1.35 | 54453 | None                                                                                                      |
| 245 | 1gg4A | 42 | 63 | 1.35 | 63419 | None                                                                                                      |
| 246 | 1n8vA | 42 | 63 | 1.35 | 81898 | None                                                                                                      |
| 247 | 1jgtA | 42 | 63 | 1.35 | 52403 | None                                                                                                      |
| 248 | 1f2A  | 42 | 63 | 1.35 | 51943 | None                                                                                                      |
| 249 | 1h5qA | 42 | 63 | 1.35 | 51751 | None                                                                                                      |
| 250 | 1gz6A | 42 | 63 | 1.35 | 51751 | None                                                                                                      |
| 251 | 1o22A | 42 | 63 | 1.35 | 90065 | structural genomics                                                                                       |
| 252 | 1ig0A | 42 | 63 | 1.35 | 63863 | None                                                                                                      |
| 253 | 1dwnA | 42 | 63 | 1.35 | 55406 | None                                                                                                      |
| 254 | 1n3lA | 42 | 63 | 1.35 | 52375 | mini-TyrRS; anticodon recognition<br>part is more divergent; secreted<br>cytokine with IL-8-like activity |
| 255 | 1lkxA | 41 | 61 | 1.37 | 52641 | None                                                                                                      |
| 256 | 1f5nA | 41 | 61 | 1.37 | 48341 | complexed with gnp, mg; mutant                                                                            |
| 257 | 1k3kA | 41 | 61 | 1.37 | 56855 | mutant                                                                                                    |
| 258 | 1f6dA | 41 | 61 | 1.37 | 53763 | None                                                                                                      |
| 259 | 1dnpA | 41 | 61 | 1.37 | 48174 | None                                                                                                      |
| 260 | 1nubA | 41 | 61 | 1.37 | 47489 | None                                                                                                      |
| 261 | 1iw7C | 41 | 61 | 1.37 | 64485 | None                                                                                                      |
| 262 | 1hrnA | 41 | 61 | 1.37 | 50646 | None                                                                                                      |
| 263 | 1mjhA | 41 | 61 | 1.37 | 52436 | None                                                                                                      |
| 264 | 1jpzA | 41 | 61 | 1.37 | 48265 | None                                                                                                      |
| 265 | 1ngvB | 41 | 61 | 1.37 | 89763 | None                                                                                                      |
| 266 | 1k0rA | 41 | 61 | 1.37 | 50282 | None                                                                                                      |
| 267 | 1ctj  | 41 | 61 | 1.37 | 46627 | complexed with hem                                                                                        |

|     |       |    |    |      |       |                                          |
|-----|-------|----|----|------|-------|------------------------------------------|
| 268 | 1fjgB | 41 | 61 | 1.37 | 52314 | complexed with mg, par, scm, sry, zn     |
| 269 | 1j79A | 41 | 61 | 1.37 | 63917 | None                                     |
| 270 | 1bif  | 41 | 61 | 1.37 | 52589 | complexed with atg, gol, mg, po4; mutant |
| 271 | 1n7vA | 41 | 61 | 1.37 | 89429 | complexed with act, ca                   |
| 272 | 1lw7A | 41 | 61 | 1.37 | 52397 | complexed with mse, nad, so4             |
| 273 | 1i50A | 41 | 61 | 1.37 | 64485 | complexed with mn, zn                    |
| 274 | 2gdm  | 41 | 61 | 1.37 | 46463 | complexed with hem, oxy                  |
| 275 | 1e29A | 41 | 61 | 1.37 | 46627 | complexed with ca, hec                   |
| 276 | 1bu6O | 41 | 61 | 1.37 | 53089 | None                                     |
| 277 | 1m4vA | 41 | 61 | 1.37 | 50219 | None                                     |
| 278 | 1n5dA | 41 | 61 | 1.37 | 51751 | complexed with ndp, so4                  |
| 279 | 1mwvA | 41 | 61 | 1.37 | 74753 | None                                     |
| 280 | 1puiA | 41 | 61 | 1.37 | 52592 | None                                     |
| 281 | 1ckmA | 41 | 61 | 1.37 | 50307 | None                                     |
| 282 | 1hhsA | 41 | 61 | 1.37 | 64480 | None                                     |
| 283 | 1d4bA | 41 | 61 | 1.37 | 54278 | None                                     |
| 284 | 1fnmA | 41 | 61 | 1.37 | 50448 | complexed with gdp, mg; mutant           |
| 285 | 8abp  | 41 | 61 | 1.37 | 53823 | complexed with gla, glb; mutant          |
| 286 | 1fcdC | 41 | 61 | 1.37 | 46680 | None                                     |
| 287 | 1dciA | 41 | 61 | 1.37 | 52103 | None                                     |
| 288 | 1ky9B | 41 | 61 | 1.37 | 74933 | None                                     |
| 289 | 1o4sA | 41 | 61 | 1.37 | 53384 | None                                     |
| 290 | 1io7A | 41 | 61 | 1.37 | 48265 | None                                     |
| 291 | 1iqcA | 41 | 61 | 1.37 | 46685 | None                                     |
| 292 | 1jyA  | 41 | 61 | 1.37 | 64514 | complexed with nfs, sf4                  |
| 293 | 1allB | 41 | 61 | 1.37 | 46532 | complexed with ch3, cyc                  |
| 294 | 1f60A | 41 | 61 | 1.37 | 50448 | None                                     |
| 295 | 1ksiA | 41 | 61 | 1.37 | 49999 | None                                     |
| 296 | 1kit  | 41 | 61 | 1.37 | 49965 | None                                     |
| 297 | 1p0yA | 41 | 61 | 1.37 | 81823 | None                                     |
| 298 | 1tubA | 41 | 61 | 1.37 | 52491 | complexed with gdp, gtp, txl             |
| 299 | 1aquA | 41 | 61 | 1.37 | 52575 | None                                     |
| 300 | 1cvuA | 41 | 61 | 1.37 | 48132 | None                                     |
| 301 | 1jsxA | 41 | 61 | 1.37 | 75264 | structural genomics                      |
| 302 | 1mzgA | 41 | 61 | 1.37 | 82650 | None                                     |
| 303 | 1bf6A | 41 | 61 | 1.37 | 51564 | None                                     |
| 304 | 1fmcA | 41 | 61 | 1.37 | 51751 | None                                     |
| 305 | 1nytA | 41 | 61 | 1.37 | 51883 | None                                     |
| 306 | 1m6nA | 41 | 61 | 1.37 | 81768 | complexed with so4                       |
| 307 | 1nktA | 41 | 61 | 1.37 | 81768 | None                                     |
| 308 | 1pda  | 41 | 61 | 1.37 | 53851 | complexed with acy, dpm                  |
| 309 | 1kb0A | 41 | 61 | 1.37 | 68952 | complexed with ca, gol, hec, pqq, tfb    |
| 310 | 1d2sA | 41 | 61 | 1.37 | 49944 | complexed with ca, dht                   |
| 311 | 1kcmA | 41 | 61 | 1.37 | 64388 | None                                     |
| 312 | 1i50B | 41 | 61 | 1.37 | 64490 | complexed with mn, zn                    |
| 313 | 1m6iA | 41 | 61 | 1.37 | 51943 | None                                     |
| 314 | 1fs7A | 41 | 61 | 1.37 | 48711 | complexed with act, ca, hem, y1          |

|     |       |    |    |      |       |                                             |
|-----|-------|----|----|------|-------|---------------------------------------------|
| 315 | lnsj  | 41 | 61 | 1.37 | 51381 | complexed with po4                          |
| 316 | lcpo  | 41 | 61 | 1.37 | 47572 | None                                        |
| 317 | lohtA | 41 | 61 | 1.37 | 55847 | complexed with egl, mse, tla, zn            |
| 318 | laop  | 41 | 61 | 1.37 | 55125 | None                                        |
| 319 | lntyD | 41 | 61 | 1.37 | 47253 | None                                        |
| 320 | lii5A | 41 | 61 | 1.37 | 53851 | complexed with glu                          |
| 321 | lfx8A | 41 | 61 | 1.37 | 56895 | complexed with bog, cry                     |
| 322 | lallA | 41 | 61 | 1.37 | 46532 | complexed with ch3, cyc                     |
| 323 | 256bA | 41 | 61 | 1.37 | 47176 | None                                        |
| 324 | liy8A | 41 | 61 | 1.37 | 51751 | None                                        |
| 325 | ljp3A | 41 | 61 | 1.37 | 64006 | None                                        |
| 326 | lp3dA | 41 | 61 | 1.37 | 51985 | None                                        |
| 327 | lni9A | 41 | 61 | 1.37 | 90087 | structural genomics                         |
| 328 | ljvaA | 41 | 61 | 1.37 | 51298 | None                                        |
| 329 | lqtrA | 41 | 61 | 1.37 | 53509 | None                                        |
| 330 | lny72 | 41 | 61 | 1.37 | 88636 | None                                        |
| 331 | lgkrA | 41 | 61 | 1.37 | 75044 | None                                        |
| 332 | lj6zA | 41 | 61 | 1.37 | 53068 | None                                        |
| 333 | ll7dA | 41 | 61 | 1.37 | 51830 | None                                        |
| 334 | lgnGA | 41 | 61 | 1.37 | 88854 | None                                        |
| 335 | ln1cA | 41 | 61 | 1.37 | 89156 | None                                        |
| 336 | ladn  | 41 | 61 | 1.37 | 57885 | complexed with zn                           |
| 337 | lcipA | 41 | 61 | 1.37 | 47896 | complexed with gnp, mg                      |
| 338 | lfuiA | 41 | 61 | 1.37 | 50444 | None                                        |
| 339 | 9wgaA | 41 | 61 | 1.37 | 57017 | None                                        |
| 340 | llshA | 41 | 61 | 1.37 | 48432 | complexed with pca, pld, upl                |
| 341 | ll5jA | 41 | 61 | 1.37 | 74779 | None                                        |
| 342 | liirA | 41 | 61 | 1.37 | 64178 | complexed with mg, so4                      |
| 343 | lmg7A | 41 | 61 | 1.37 | 89824 | None                                        |
| 344 | lgpeA | 41 | 61 | 1.37 | 51913 | None                                        |
| 345 | lubkL | 41 | 61 | 1.37 | 56763 | complexed with cmo, fine, fs3, fs4, mg, mpd |
| 346 | ll8wA | 41 | 61 | 1.37 | 74749 | None                                        |
| 347 | lm13A | 41 | 61 | 1.37 | 48509 | complexed with hyf                          |
| 348 | lm5yA | 41 | 61 | 1.37 | 81828 | None                                        |
| 349 | lkzqA | 41 | 61 | 1.37 | 74878 | None                                        |
| 350 | 2tbvA | 41 | 61 | 1.37 | 88643 | None                                        |
| 351 | ldceA | 41 | 61 | 1.37 | 48440 | None                                        |
| 352 | lkv9A | 41 | 61 | 1.37 | 68952 | complexed with acn, ca, epe, gol, hem, pqq  |
| 353 | lmg2D | 41 | 61 | 1.37 | 46627 | None                                        |
| 354 | lgegA | 41 | 61 | 1.37 | 51751 | None                                        |
| 355 | lkk1A | 41 | 61 | 1.37 | 50448 | complexed with gnp, mg, zn; mutant          |
| 356 | laua  | 41 | 61 | 1.37 | 46939 | complexed with bog                          |
| 357 | lqorA | 41 | 61 | 1.37 | 50136 | None                                        |
| 358 | lmukA | 41 | 61 | 1.37 | 56694 | None                                        |
| 359 | ljnrB | 41 | 61 | 1.37 | 54884 | None                                        |
| 360 | lhqz1 | 41 | 61 | 1.37 | 55762 | None                                        |



|     |       |    |    |      |       |                                                         |
|-----|-------|----|----|------|-------|---------------------------------------------------------|
| 361 | 1howA | 41 | 61 | 1.37 | 88854 | residues 305-538 were deleted and replaced with Val-Asp |
| 362 | 1uxy  | 41 | 61 | 1.37 | 56184 | complexed with epu, fad; mutant                         |
| 363 | 1d09B | 41 | 61 | 1.37 | 54894 | None                                                    |
| 364 | 1oqcA | 41 | 61 | 1.37 | 69001 | None                                                    |
| 365 | 1kepA | 41 | 61 | 1.37 | 51751 | None                                                    |
| 366 | 1fkmA | 41 | 61 | 1.37 | 47924 | None                                                    |
| 367 | 4fiv  | 41 | 61 | 1.37 | 50631 | complexed with 1ni                                      |
| 368 | 1in4A | 41 | 61 | 1.37 | 46819 | complexed with act, adp, co, hez                        |
| 369 | 1ndbA | 41 | 61 | 1.37 | 82424 | None                                                    |
| 370 | 1jfbA | 41 | 61 | 1.37 | 48265 | complexed with gol, hem                                 |
| 371 | 1l7vC | 41 | 61 | 1.37 | 52686 | None                                                    |
| 372 | 1guzA | 41 | 61 | 1.37 | 51848 | None                                                    |
| 373 | 1ky3A | 41 | 61 | 1.37 | 52592 | complexed with gdp, mg                                  |
| 374 | 1jw9B | 41 | 61 | 1.37 | 69573 | complexed with so4, zn                                  |
| 375 | 1hzdA | 41 | 61 | 1.37 | 52103 | None                                                    |
| 376 | 1hzdA | 41 | 61 | 1.37 | 52103 | None                                                    |
| 377 | 1hdmA | 41 | 61 | 1.37 | 48942 | None                                                    |
| 378 | 1lki  | 41 | 61 | 1.37 | 47267 | None                                                    |
| 379 | 1miwA | 41 | 61 | 1.37 | 81892 | None                                                    |
| 380 | 1f0yA | 41 | 61 | 1.37 | 48187 | None                                                    |
| 381 | 1gy8A | 41 | 61 | 1.37 | 51751 | None                                                    |
| 382 | 1or7A | 41 | 61 | 1.37 | 88665 | None                                                    |
| 383 | 1iz5A | 41 | 61 | 1.37 | 55983 | None                                                    |
| 384 | 1nsoA | 41 | 61 | 1.37 | 50631 | folded monomer                                          |
| 385 | 1cjcA | 41 | 61 | 1.37 | 51906 | complexed with fad                                      |
| 386 | 1ayx  | 41 | 61 | 1.37 | 48209 | complexed with trs                                      |
| 387 | 1lqtA | 41 | 61 | 1.37 | 51906 | None                                                    |
| 388 | 1gsa  | 41 | 61 | 1.37 | 52457 | complexed with adp, gtt, mg, so4                        |
| 389 | 1h6vA | 41 | 61 | 1.37 | 51943 | None                                                    |
| 390 | 1qdlA | 41 | 61 | 1.37 | 56323 | None                                                    |
| 391 | 1gteA | 41 | 61 | 1.37 | 46553 | None                                                    |
| 392 | 1aa6  | 41 | 61 | 1.37 | 50696 | complexed with 4mo, cse, fs4, mgd                       |
| 393 | 1oaa  | 41 | 61 | 1.37 | 51751 | complexed with nap, oaa, so4                            |
| 394 | 1oaa  | 41 | 61 | 1.37 | 51751 | complexed with nap, oaa, so4                            |
| 395 | 1j9lA | 41 | 61 | 1.37 | 64168 | None                                                    |
| 396 | 1fj2A | 41 | 61 | 1.37 | 53547 | None                                                    |
| 397 | 1aoa  | 40 | 58 | 1.39 | 47577 | None                                                    |
| 398 | 2napA | 40 | 58 | 1.39 | 50696 | complexed with fs4, mes, mgd, mo                        |
| 399 | 1k28A | 40 | 58 | 1.39 | 69256 | complexed with k, po4                                   |
| 400 | 1ja1A | 40 | 58 | 1.39 | 50438 | None                                                    |
