# Supplementary material
Source: PubMed Central journal article supplement (PMC7126412)
Supplement: mmc3.pdf [file mmc3.pdf]

## Recognition of estradiol binding sites by searching the ASTRAL dataset.

The Table presents a list of proteins (top 400) whose binding sites were recognized to be similar to the estradiol binding site of the sex hormone-binding globulin (1lhu). The proteins are listed in order of decreasing similarity to the query binding site.

| Rank | PDB code | Match Score | t-score | p-value | SCOP Family | SCOP Remarks                             |
|------|----------|-------------|---------|---------|-------------|------------------------------------------|
| 1    | 1lhuA    | 100         | 203     | 0.02    | 49944       | complexed with ca, est                   |
| 2    | 1d2sA    | 66          | 122     | 0.80    | 49944       | complexed with ca, dht                   |
| 3    | 1p4tA    | 57          | 101     | 1.01    | 56926       | complexed with cxe, eta, so4             |
| 4    | 1ad2     | 55          | 96      | 1.05    | 56809       | complexed with hg, mpd, so4; mutant      |
| 5    | 1lfpA    | 52          | 89      | 1.12    | 75626       | structural genomics                      |
| 6    | 1fx8A    | 52          | 89      | 1.12    | 56895       | complexed with bog, cry                  |
| 7    | 1otsA    | 50          | 84      | 1.17    | 69912       | None                                     |
| 8    | 1n7dA    | 50          | 84      | 1.17    | 63826       | complexed with ca, keg, man, nag; mutant |
| 9    | 1fbvA    | 50          | 84      | 1.17    | 47547       | complexed with so4, zn                   |
| 10   | 1fepA    | 50          | 84      | 1.17    | 56948       | None                                     |
| 11   | 1aky     | 50          | 84      | 1.17    | 52541       | complexed with ap5, imd                  |
| 12   | 1mdbA    | 50          | 84      | 1.17    | 56802       | complexed with amp, dbh, so4             |
| 13   | 1k8tA    | 50          | 84      | 1.17    | 69887       | complexed with ni, so4                   |
| 14   | 1fk5A    | 49          | 82      | 1.19    | 47700       | complexed with fmt, ola                  |
| 15   | 1kmoA    | 49          | 82      | 1.19    | 56948       | complexed with hto, lda                  |
| 16   | 1m4uA    | 49          | 82      | 1.19    | 82904       | complexed with nag                       |
| 17   | 1j4nA    | 49          | 82      | 1.19    | 56895       | complexed with bng                       |
| 18   | 1ewfA    | 49          | 82      | 1.19    | 55395       | None                                     |
| 19   | 1d6gA    | 48          | 79      | 1.21    | 57643       | complex with cholecystokinin-8           |
| 20   | 1ehkA    | 47          | 77      | 1.23    | 81441       | complexed with 1cu, bng, cua, has, hem   |
| 21   | 1sco     | 47          | 77      | 1.23    | 57116       | None                                     |
| 22   | 2por     | 47          | 77      | 1.23    | 56936       | complexed with ca, ote                   |
| 23   | 1kb4B    | 47          | 77      | 1.23    | 57721       | complexed with zn                        |
| 24   | 1daaA    | 47          | 77      | 1.23    | 56753       | None                                     |
| 25   | 1k81A    | 47          | 77      | 1.23    | 75690       | complexed with zn                        |
| 26   | 1kpgA    | 47          | 77      | 1.23    | 69560       | None                                     |
| 27   | 1k8bA    | 46          | 74      | 1.26    | 75690       | None                                     |
| 28   | 1k24A    | 46          | 74      | 1.26    | 75651       | complexed with 1pe, zn                   |
| 29   | 1i7dA    | 46          | 74      | 1.26    | 56713       | complexed with cl, so4; mutant           |
| 30   | 1ktjA    | 46          | 74      | 1.26    | 81287       | None                                     |
| 31   | 1qubA    | 46          | 74      | 1.26    | 57536       | None                                     |
| 32   | 1n12A    | 46          | 74      | 1.26    | 49405       | None                                     |
| 33   | 1lznB    | 46          | 74      | 1.26    | 90100       | None                                     |
| 34   | 1n46A    | 46          | 74      | 1.26    | 48509       | None                                     |
| 35   | 19hcA    | 46          | 74      | 1.26    | 48696       | None                                     |
| 36   | 1skz     | 46          | 74      | 1.26    | 57263       | None                                     |
| 37   | 1bgxT    | 46          | 74      | 1.26    | 47808       | None                                     |
| 38   | 1pce     | 46          | 74      | 1.26    | 57468       | None                                     |

|    |       |    |    |      |       |                                            |
|----|-------|----|----|------|-------|--------------------------------------------|
| 39 | 1aquA | 46 | 74 | 1.26 | 52575 | None                                       |
| 40 | 1rgs  | 46 | 74 | 1.26 | 51210 | None                                       |
| 41 | 1jyA  | 45 | 72 | 1.28 | 64514 | complexed with nfs, sf4                    |
| 42 | 1m0kA | 45 | 72 | 1.28 | 81319 | K intermediate                             |
| 43 | 1et0A | 45 | 72 | 1.28 | 56753 | complexed with plp                         |
| 44 | 2ae2A | 45 | 72 | 1.28 | 51751 | None                                       |
| 45 | 1kq3A | 45 | 72 | 1.28 | 69892 | structural genomics                        |
| 46 | 1by5A | 45 | 72 | 1.28 | 56948 | complexed with c8e, fe, orn                |
| 47 | 1nuuA | 45 | 72 | 1.28 | 90090 | None                                       |
| 48 | 1dd9A | 45 | 72 | 1.28 | 56732 | complexed with sr                          |
| 49 | 1d3yA | 45 | 72 | 1.28 | 56727 | None                                       |
| 50 | 1f81A | 45 | 72 | 1.28 | 57934 | TAZ2 domain (also CH3 domain)              |
| 51 | 1miwA | 45 | 72 | 1.28 | 81892 | None                                       |
| 52 | 1mkiA | 45 | 72 | 1.28 | 90084 | None                                       |
| 53 | 1h29A | 45 | 72 | 1.28 | 48696 | None                                       |
| 54 | 1h2sA | 45 | 72 | 1.28 | 81319 | None                                       |
| 55 | 1cixA | 45 | 72 | 1.28 | 57072 | None                                       |
| 56 | 1qjpA | 45 | 72 | 1.28 | 56926 | complexed with c8e; mutant                 |
| 57 | 1ibiA | 45 | 72 | 1.28 | 57736 | None                                       |
| 58 | 1cc1L | 45 | 72 | 1.28 | 56763 | complexed with cse, fco, fe2, fs4, h2s, ni |
| 59 | 1jgkA | 45 | 72 | 1.28 | 57303 | None                                       |
| 60 | 1i26A | 45 | 72 | 1.28 | 69930 | None                                       |
| 61 | 1i19A | 45 | 72 | 1.28 | 64284 | None                                       |
| 62 | 1lv2A | 45 | 72 | 1.28 | 48509 | complexed with plm                         |
| 63 | 1g4yB | 45 | 72 | 1.28 | 81326 | gating domain in complex with calmodulin   |
| 64 | 2cy3  | 45 | 72 | 1.28 | 48696 | complexed with hem                         |
| 65 | 1ky9B | 45 | 72 | 1.28 | 74933 | None                                       |
| 66 | 1mkyA | 45 | 72 | 1.28 | 52592 | None                                       |
| 67 | 1eskA | 45 | 72 | 1.28 | 57757 | complexed with zn                          |
| 68 | 1qkmA | 44 | 70 | 1.30 | 48509 | complex with partial agonist genistein     |
| 69 | 1ekfA | 44 | 70 | 1.30 | 56753 | None                                       |
| 70 | 1jm7A | 44 | 70 | 1.30 | 57851 | heterodimer with bard1 RING domain         |
| 71 | 1k0rA | 44 | 70 | 1.30 | 50282 | None                                       |
| 72 | 1pme  | 44 | 70 | 1.30 | 88854 | complexed with 577, so4; mutant            |
| 73 | 1iymA | 44 | 70 | 1.30 | 57851 | complexed with zn                          |
| 74 | 1mt5A | 44 | 70 | 1.30 | 75305 | None                                       |
| 75 | 1qovM | 44 | 70 | 1.30 | 81482 | None                                       |
| 76 | 1yujA | 44 | 70 | 1.30 | 57668 | protein/DNA complex; complexed with zn     |
| 77 | 1qorA | 44 | 70 | 1.30 | 50136 | None                                       |
| 78 | 1trb  | 44 | 70 | 1.30 | 51943 | None                                       |
| 79 | 1imt  | 44 | 70 | 1.30 | 57191 | None                                       |
| 80 | 1n5uA | 44 | 70 | 1.30 | 48553 | None                                       |
| 81 | 1lfo  | 44 | 70 | 1.30 | 50847 | complexed with ace, beo, ola, unx          |
| 82 | 1n9lA | 44 | 70 | 1.30 | 88853 | complexed with fmn, sul                    |
| 83 | 1p3dA | 44 | 70 | 1.30 | 51985 | None                                       |

|     |       |    |    |      |       |                                                                                                   |
|-----|-------|----|----|------|-------|---------------------------------------------------------------------------------------------------|
| 84  | 1f1eA | 44 | 70 | 1.30 | 47129 | complexed with cl                                                                                 |
| 85  | 1duvG | 44 | 70 | 1.30 | 53672 | None                                                                                              |
| 86  | 1aocA | 44 | 70 | 1.30 | 57531 | None                                                                                              |
| 87  | 1hd1A | 44 | 70 | 1.30 | 69960 | domain 1                                                                                          |
| 88  | 1l8cA | 44 | 70 | 1.30 | 57934 | TAZ1 domain; complexed with the C-terminal activation domain (CTAD) of human HIF-1alpha (chain B) |
| 89  | 1h1b  | 44 | 70 | 1.30 | 46463 | complexed with hem                                                                                |
| 90  | 1eulA | 44 | 70 | 1.30 | 81652 | complexed with ca                                                                                 |
| 91  | 1gx1A | 44 | 70 | 1.30 | 69766 | None                                                                                              |
| 92  | 1nqeA | 44 | 70 | 1.30 | 56948 | complexed with c8e, mg                                                                            |
| 93  | 1h7sA | 44 | 70 | 1.30 | 54224 | None                                                                                              |
| 94  | 1lpvA | 44 | 70 | 1.30 | 82928 | complexed with zn                                                                                 |
| 95  | 1fgjA | 44 | 70 | 1.30 | 48711 | None                                                                                              |
| 96  | 1je0A | 43 | 67 | 1.33 | 53168 | None                                                                                              |
| 97  | 1mgpA | 43 | 67 | 1.33 | 82550 | structural genomics                                                                               |
| 98  | 1kbiA | 43 | 67 | 1.33 | 51396 | complexed with fmn, hem, mpd, po4, pyr                                                            |
| 99  | 1kzkA | 43 | 67 | 1.33 | 50631 | None                                                                                              |
| 100 | 1hulA | 43 | 67 | 1.33 | 47286 | None                                                                                              |
| 101 | 1kssA | 43 | 67 | 1.33 | 48711 | complexed with fad, fum, hem, na; mutant                                                          |
| 102 | 1hy9A | 43 | 67 | 1.33 | 64547 | C-terminal domain                                                                                 |
| 103 | 2tbvA | 43 | 67 | 1.33 | 88643 | None                                                                                              |
| 104 | 1mo9A | 43 | 67 | 1.33 | 51943 | None                                                                                              |
| 105 | 1dciA | 43 | 67 | 1.33 | 52103 | None                                                                                              |
| 106 | 1dxcC | 43 | 67 | 1.33 | 48707 | complexed with bcb, bpb, fe2, hec, lda, mq9, mst, ns5, so4; mutant                                |
| 107 | 1irdA | 43 | 67 | 1.33 | 46463 | complexed with cmo, hem                                                                           |
| 108 | 4fiv  | 43 | 67 | 1.33 | 50631 | complexed with 1ni                                                                                |
| 109 | 1bi5A | 43 | 67 | 1.33 | 53914 | None                                                                                              |
| 110 | 1iycA | 43 | 67 | 1.33 | 90179 | None                                                                                              |
| 111 | 1iknD | 43 | 67 | 1.33 | 48404 | None                                                                                              |
| 112 | 2bi6H | 43 | 67 | 1.33 | 57244 | None                                                                                              |
| 113 | 1gqeA | 43 | 67 | 1.33 | 75621 | complexed with mse; mutant                                                                        |
| 114 | 1jchA | 43 | 67 | 1.33 | 63841 | None                                                                                              |
| 115 | 1n87A | 43 | 67 | 1.33 | 90222 | None                                                                                              |
| 116 | 1qbkB | 43 | 67 | 1.33 | 48372 | complexed with gnp, mg                                                                            |
| 117 | 1dj7A | 43 | 67 | 1.33 | 57663 | None                                                                                              |
| 118 | 1ie9A | 43 | 67 | 1.33 | 48509 | complexed with vdx                                                                                |
| 119 | 1bif  | 43 | 67 | 1.33 | 52589 | complexed with atg, gol, mg, po4; mutant                                                          |
| 120 | 1n4yA | 43 | 67 | 1.33 | 57553 | refined solution structure                                                                        |
| 121 | 1i5nA | 43 | 67 | 1.33 | 63512 | None                                                                                              |
| 122 | 3lkfA | 43 | 67 | 1.33 | 56960 | complexed with poc                                                                                |
| 123 | 1crb  | 43 | 67 | 1.33 | 50847 | complexed with cd, rtl                                                                            |
| 124 | 1e8rA | 43 | 67 | 1.33 | 57616 | None                                                                                              |
| 125 | 1ky9A | 43 | 67 | 1.33 | 74933 | None                                                                                              |

|     |       |    |    |      |       |                                             |
|-----|-------|----|----|------|-------|---------------------------------------------|
| 126 | 1hh1A | 43 | 67 | 1.33 | 64080 | None                                        |
| 127 | 1e79D | 43 | 67 | 1.33 | 47918 | None                                        |
| 128 | 1qkrA | 43 | 67 | 1.33 | 47221 | None                                        |
| 129 | 1dxgA | 43 | 67 | 1.33 | 57813 | None                                        |
| 130 | 1tgsI | 43 | 67 | 1.33 | 57468 | complexed with ca, so4                      |
| 131 | 1io7A | 43 | 67 | 1.33 | 48265 | None                                        |
| 132 | 1bmr  | 43 | 67 | 1.33 | 57096 | complexed with nh2                          |
| 133 | 1ly2A | 43 | 67 | 1.33 | 57536 | None                                        |
| 134 | 1gegA | 43 | 67 | 1.33 | 51751 | None                                        |
| 135 | 1ni4B | 43 | 67 | 1.33 | 88741 | None                                        |
| 136 | 1kv3A | 43 | 67 | 1.33 | 81289 | None                                        |
| 137 | 1ewsA | 43 | 67 | 1.33 | 57393 | None                                        |
| 138 | 1m1qA | 43 | 67 | 1.33 | 48711 | complexed with hem, sul                     |
| 139 | 2sn3  | 43 | 67 | 1.33 | 57096 | complexed with mpd                          |
| 140 | 1g2nA | 43 | 67 | 1.33 | 48509 | complexed with eph                          |
| 141 | 1jksA | 43 | 67 | 1.33 | 88854 | None                                        |
| 142 | 1n8vA | 43 | 67 | 1.33 | 81898 | None                                        |
| 143 | 1tyfA | 43 | 67 | 1.33 | 52097 | None                                        |
| 144 | 1qkyA | 43 | 67 | 1.33 | 57116 | None                                        |
| 145 | 1fv5A | 43 | 67 | 1.33 | 57697 | the first zinc finger                       |
| 146 | 1c0vA | 42 | 65 | 1.35 | 81332 | None                                        |
| 147 | 1jpzA | 42 | 65 | 1.35 | 48265 | None                                        |
| 148 | 1okeA | 42 | 65 | 1.35 | 81284 | None                                        |
| 149 | 1d3gA | 42 | 65 | 1.35 | 51396 | complexed with act, bre, ddq, fmn, oro, so4 |
| 150 | 1jkmA | 42 | 65 | 1.35 | 53487 | None                                        |
| 151 | 1j9lA | 42 | 65 | 1.35 | 64168 | None                                        |
| 152 | 1g29l | 42 | 65 | 1.35 | 50338 | None                                        |
| 153 | 1qqqA | 42 | 65 | 1.35 | 55832 | complexed with so4; mutant                  |
| 154 | 1c52  | 42 | 65 | 1.35 | 46627 | complexed with hem                          |
| 155 | 1e32A | 42 | 65 | 1.35 | 50708 | complexed with adp                          |
| 156 | 1g25A | 42 | 65 | 1.35 | 57851 | complexed with zn                           |
| 157 | 1qj8A | 42 | 65 | 1.35 | 56926 | complexed with c8e, pcl; mutant             |
| 158 | 1n1eA | 42 | 65 | 1.35 | 48197 | None                                        |
| 159 | 4mt2  | 42 | 65 | 1.35 | 57869 | Two domains (1-32;33-61)                    |
| 160 | 1tgoA | 42 | 65 | 1.35 | 53118 | None                                        |
| 161 | 2rspA | 42 | 65 | 1.35 | 50631 | None                                        |
| 162 | 1extA | 42 | 65 | 1.35 | 57587 | None                                        |
| 163 | 1e8xA | 42 | 65 | 1.35 | 48399 | complexed with atp, lu; mutant              |
| 164 | 1apj  | 42 | 65 | 1.35 | 57582 | None                                        |
| 165 | 1qo7A | 42 | 65 | 1.35 | 53525 | None                                        |
| 166 | 2gdm  | 42 | 65 | 1.35 | 46463 | complexed with hem, oxy                     |
| 167 | 1guzA | 42 | 65 | 1.35 | 51848 | None                                        |
| 168 | 1n97A | 42 | 65 | 1.35 | 48265 | None                                        |
| 169 | 3prn  | 42 | 65 | 1.35 | 56936 | complexed with c8e, mg; mutant              |
| 170 | 1koiA | 42 | 65 | 1.35 | 50815 | complexed with hem, nmo                     |
| 171 | 1a28A | 42 | 65 | 1.35 | 48509 | None                                        |
| 172 | 1mx1A | 42 | 65 | 1.35 | 53475 | None                                        |

|     |       |    |    |      |       |                                                                 |
|-----|-------|----|----|------|-------|-----------------------------------------------------------------|
| 173 | 1jqnA | 42 | 65 | 1.35 | 51632 | complexed with asp, dco, mn                                     |
| 174 | 1hx2A | 42 | 65 | 1.35 | 57577 | None                                                            |
| 175 | 1mqSA | 42 | 65 | 1.35 | 56816 | complexed with an N-terminal peptide of sed5p, chain B          |
| 176 | 1l3lA | 42 | 65 | 1.35 | 46900 | None                                                            |
| 177 | 1g10A | 42 | 65 | 1.35 | 56030 | None                                                            |
| 178 | 1ncs  | 42 | 65 | 1.35 | 57668 | domain 1; has an extension to the common fold at the N-terminus |
| 179 | 1e88A | 42 | 65 | 1.35 | 57459 | None                                                            |
| 180 | 1gwiA | 42 | 65 | 1.35 | 48265 | None                                                            |
| 181 | 2bds  | 42 | 65 | 1.35 | 57393 | None                                                            |
| 182 | 1nstA | 42 | 65 | 1.35 | 52575 | complexed with a3p                                              |
| 183 | 1nrwA | 42 | 65 | 1.35 | 82388 | structural genomics                                             |
| 184 | 1co4A | 42 | 65 | 1.35 | 57880 | complexed with zn                                               |
| 185 | 1f8rA | 42 | 65 | 1.35 | 51913 | None                                                            |
| 186 | 1o6yA | 42 | 65 | 1.35 | 88854 | complexed with acp, mg                                          |
| 187 | 1fnoA | 42 | 65 | 1.35 | 53204 | complexed with mse, so4, zn2                                    |
| 188 | 1lriA | 42 | 65 | 1.35 | 48648 | complexed with cholesterol                                      |
| 189 | 1a9xA | 42 | 65 | 1.35 | 48109 | None                                                            |
| 190 | 1fbnA | 42 | 65 | 1.35 | 53342 | structural genomics                                             |
| 191 | 1nni1 | 42 | 65 | 1.35 | 89590 | structural genomics                                             |
| 192 | 1ln1A | 42 | 65 | 1.35 | 55966 | complexed with dlp                                              |
| 193 | 1f35A | 42 | 65 | 1.35 | 63698 | None                                                            |
| 194 | 1cz4A | 42 | 65 | 1.35 | 50708 | None                                                            |
| 195 | 1gknA | 42 | 65 | 1.35 | 57536 | None                                                            |
| 196 | 1m0gA | 42 | 65 | 1.35 | 57869 | alpha domain                                                    |
| 197 | 1kl7A | 42 | 65 | 1.35 | 53687 | None                                                            |
| 198 | 1oahA | 42 | 65 | 1.35 | 48711 | None                                                            |
| 199 | 1ica  | 42 | 65 | 1.35 | 57163 | None                                                            |
| 200 | 1k3pA | 42 | 65 | 1.35 | 48257 | None                                                            |
| 201 | 1cd1A | 42 | 65 | 1.35 | 48942 | None                                                            |
| 202 | 1jjuA | 42 | 65 | 1.35 | 68956 | None                                                            |
| 203 | 1hxxA | 42 | 65 | 1.35 | 56936 | complexed with c8e; mutant                                      |
| 204 | 1couA | 42 | 65 | 1.35 | 57568 | None                                                            |
| 205 | 1dguA | 42 | 65 | 1.35 | 47502 | None                                                            |
| 206 | 1em2A | 42 | 65 | 1.35 | 55966 | complexed with tar; mutant                                      |
| 207 | 1lr7A | 42 | 65 | 1.35 | 57236 | complexed with so4                                              |
| 208 | 1ltxR | 42 | 65 | 1.35 | 51931 | complexed with cl, far, zn2; mutant                             |
| 209 | 1p4oA | 42 | 65 | 1.35 | 88854 | None                                                            |
| 210 | 1jj2R | 42 | 65 | 1.35 | 54190 | complexed with cd, cl, k, mg, na                                |
| 211 | 1vns  | 42 | 65 | 1.35 | 48325 | complexed with so4                                              |
| 212 | 1e3hA | 42 | 65 | 1.35 | 46916 | complexed with so4                                              |
| 213 | 1m0jA | 42 | 65 | 1.35 | 57869 | beta domain                                                     |
| 214 | 1fmb  | 42 | 65 | 1.35 | 50631 | complexed with hyb; mutant                                      |
| 215 | 1tfi  | 42 | 65 | 1.35 | 57784 | complexed with zn                                               |
| 216 | 1edoA | 42 | 65 | 1.35 | 51751 | complexed with nap                                              |
| 217 | 1hdj  | 42 | 65 | 1.35 | 46566 | None                                                            |
| 218 | 1ne5A | 42 | 65 | 1.35 | 57116 | None                                                            |

|     |       |    |    |      |       |                                                        |
|-----|-------|----|----|------|-------|--------------------------------------------------------|
| 219 | 1ebfA | 42 | 65 | 1.35 | 51800 | None                                                   |
| 220 | 1bu6O | 42 | 65 | 1.35 | 53089 | None                                                   |
| 221 | 1p16A | 42 | 65 | 1.35 | 50307 | None                                                   |
| 222 | 1n8lA | 42 | 65 | 1.35 | 47337 | None                                                   |
| 223 | 1c75A | 42 | 65 | 1.35 | 46627 | complexed with hem                                     |
| 224 | 1gyoA | 42 | 65 | 1.35 | 48696 | None                                                   |
| 225 | 1lldA | 42 | 65 | 1.35 | 51848 | None                                                   |
| 226 | 1f62A | 42 | 65 | 1.35 | 57911 | complexed with zn                                      |
| 227 | 1zfyA | 42 | 65 | 1.35 | 51413 | contains two CBS domains inserted into the common fold |
| 228 | 1i8nA | 42 | 65 | 1.35 | 64556 | None                                                   |
| 229 | 1fmcA | 42 | 65 | 1.35 | 51751 | None                                                   |
| 230 | 1iz5A | 41 | 63 | 1.37 | 55983 | None                                                   |
| 231 | 1h2kA | 41 | 63 | 1.37 | 82194 | complex with HIF-1 alpha fragment peptide              |
| 232 | 1kt7A | 41 | 63 | 1.37 | 50815 | complexed with rtl                                     |
| 233 | 1jnrA | 41 | 63 | 1.37 | 46978 | None                                                   |
| 234 | 1h5oA | 41 | 63 | 1.37 | 90157 | None                                                   |
| 235 | 1l8aA | 41 | 63 | 1.37 | 88735 | None                                                   |
| 236 | 1cx4A | 41 | 63 | 1.37 | 51210 | None                                                   |
| 237 | 1f45B | 41 | 63 | 1.37 | 47267 | complexed with man, nag; mutant                        |
| 238 | 1ksfX | 41 | 63 | 1.37 | 81924 | complexed with adp, ioh, met, mg, pge; mutant          |
| 239 | 1cb0A | 41 | 63 | 1.37 | 53168 | complexed with ade; mutant                             |
| 240 | 1mxtA | 41 | 63 | 1.37 | 51913 | atomic resolution structure                            |
| 241 | 1lshA | 41 | 63 | 1.37 | 48432 | complexed with pca, pld, upl                           |
| 242 | 1h32A | 41 | 63 | 1.37 | 81677 | None                                                   |
| 243 | 1crzA | 41 | 63 | 1.37 | 50961 | None                                                   |
| 244 | 2sqcA | 41 | 63 | 1.37 | 48243 | None                                                   |
| 245 | 1ecrA | 41 | 63 | 1.37 | 56597 | protein/DNA complex                                    |
| 246 | 1gzqA | 41 | 63 | 1.37 | 48942 | complexed with d12, no3, pii, twt                      |
| 247 | 1htjF | 41 | 63 | 1.37 | 48098 | mutant                                                 |
| 248 | 1bmtA | 41 | 63 | 1.37 | 47645 | None                                                   |
| 249 | 1kagA | 41 | 63 | 1.37 | 52566 | None                                                   |
| 250 | 1pyiA | 41 | 63 | 1.37 | 57702 | None                                                   |
| 251 | 1oyb  | 41 | 63 | 1.37 | 51396 | complexed with fmn, hba                                |
| 252 | 1iktA | 41 | 63 | 1.37 | 55719 | complexed with oxn, so4                                |
| 253 | 3cyr  | 41 | 63 | 1.37 | 48696 | complexed with hem                                     |
| 254 | 1p4xA | 41 | 63 | 1.37 | 63379 | None                                                   |
| 255 | 1gr0A | 41 | 63 | 1.37 | 51800 | complexed with cac, nad, zn                            |
| 256 | 1d0cA | 41 | 63 | 1.37 | 56513 | None                                                   |
| 257 | 1dqwA | 41 | 63 | 1.37 | 51375 | None                                                   |
| 258 | 1lqaA | 41 | 63 | 1.37 | 51431 | None                                                   |
| 259 | 1fo4A | 41 | 63 | 1.37 | 47742 | None                                                   |
| 260 | 1pk5A | 41 | 63 | 1.37 | 48509 | None                                                   |
| 261 | 1ezvD | 41 | 63 | 1.37 | 46676 | complexed with fes, hem, sma, uq6                      |
| 262 | 1klfB | 41 | 63 | 1.37 | 49405 | None                                                   |
| 263 | 1b63A | 41 | 63 | 1.37 | 54224 | complexed with anp, edo, mg                            |

|     |       |    |    |      |       |                                                                                                                   |
|-----|-------|----|----|------|-------|-------------------------------------------------------------------------------------------------------------------|
| 264 | 1gph1 | 41 | 63 | 1.37 | 53272 | None                                                                                                              |
| 265 | 1psuA | 41 | 63 | 1.37 | 89902 | None                                                                                                              |
| 266 | 1n91A | 41 | 63 | 1.37 | 69787 | structural genomics                                                                                               |
| 267 | 1ojt  | 41 | 63 | 1.37 | 51943 | None                                                                                                              |
| 268 | 1kdgA | 41 | 63 | 1.37 | 51913 | None                                                                                                              |
| 269 | 1de4C | 41 | 63 | 1.37 | 47673 | None                                                                                                              |
| 270 | 451c  | 41 | 63 | 1.37 | 46627 | complexed with hem                                                                                                |
| 271 | 451c  | 41 | 63 | 1.37 | 46627 | complexed with hem                                                                                                |
| 272 | 1c4xA | 41 | 63 | 1.37 | 53522 | None                                                                                                              |
| 273 | 1omwA | 41 | 63 | 1.37 | 48098 | complexed with cmt; mutant                                                                                        |
| 274 | 1n0uA | 41 | 63 | 1.37 | 50448 | complexed with so1                                                                                                |
| 275 | 1jm6A | 41 | 63 | 1.37 | 69013 | None                                                                                                              |
| 276 | 1g7sA | 41 | 63 | 1.37 | 50448 | None                                                                                                              |
| 277 | 1k8kA | 41 | 63 | 1.37 | 53068 | None                                                                                                              |
| 278 | 1adt  | 41 | 63 | 1.37 | 47725 | complexed with zn                                                                                                 |
| 279 | 1isuA | 41 | 63 | 1.37 | 57653 | None                                                                                                              |
| 280 | 1myn  | 41 | 63 | 1.37 | 57163 | None                                                                                                              |
| 281 | 2hpgP | 41 | 63 | 1.37 | 57441 | complexed with ch2                                                                                                |
| 282 | 1nbjA | 41 | 63 | 1.37 | 57042 | by homology with Kalata, in the precursor, the mature protein sequence probably begins at Gly28 and ends at Asn27 |
| 283 | 1hqsA | 41 | 63 | 1.37 | 53660 | None                                                                                                              |
| 284 | 1csh  | 41 | 63 | 1.37 | 48257 | complexed with amx, oaa                                                                                           |
| 285 | 1kn0A | 41 | 63 | 1.37 | 82645 | None                                                                                                              |
| 286 | 1k8mA | 41 | 63 | 1.37 | 51231 | None                                                                                                              |
| 287 | 1ivyA | 41 | 63 | 1.37 | 53499 | None                                                                                                              |
| 288 | 1o97D | 41 | 63 | 1.37 | 52432 | complexed with amp, fad                                                                                           |
| 289 | 1l7dA | 41 | 63 | 1.37 | 51830 | None                                                                                                              |
| 290 | 1e8cA | 41 | 63 | 1.37 | 63419 | None                                                                                                              |
| 291 | 1vpu  | 41 | 63 | 1.37 | 57648 | mutant                                                                                                            |
| 292 | 1bik  | 41 | 63 | 1.37 | 57363 | None                                                                                                              |
| 293 | 1h6vA | 41 | 63 | 1.37 | 51943 | None                                                                                                              |
| 294 | 1mzpA | 41 | 63 | 1.37 | 56809 | complex with a 23S rRNA fragment                                                                                  |
| 295 | 1n62B | 41 | 63 | 1.37 | 54666 | None                                                                                                              |
| 296 | 1lmjA | 41 | 63 | 1.37 | 57197 | None                                                                                                              |
| 297 | 3btaA | 41 | 63 | 1.37 | 49956 | complexed with zn                                                                                                 |
| 298 | 1hh5A | 41 | 63 | 1.37 | 48696 | complexed with hec                                                                                                |
| 299 | 1b6cB | 41 | 63 | 1.37 | 88854 | None                                                                                                              |
| 300 | 1kk6A | 41 | 63 | 1.37 | 51168 | None                                                                                                              |
| 301 | 1i8oA | 41 | 63 | 1.37 | 46627 | complexed with hec, nh3, sul                                                                                      |
| 302 | 1ew0A | 41 | 63 | 1.37 | 55789 | complexed with hem                                                                                                |
| 303 | 1bx7  | 41 | 63 | 1.37 | 57263 | complexed with so4                                                                                                |
| 304 | 1cydA | 41 | 63 | 1.37 | 51751 | None                                                                                                              |
| 305 | 1jlzA | 41 | 63 | 1.37 | 57116 | None                                                                                                              |
| 306 | 1iuuA | 41 | 63 | 1.37 | 57653 | complexed with fs4, so4                                                                                           |
| 307 | 2prgA | 41 | 63 | 1.37 | 48509 | None                                                                                                              |
| 308 | 4bcl  | 41 | 63 | 1.37 | 51082 | complexed with bcl                                                                                                |

|     |       |    |    |      |       |                                                                                                     |
|-----|-------|----|----|------|-------|-----------------------------------------------------------------------------------------------------|
| 309 | 1ji0A | 41 | 63 | 1.37 | 52686 | complexed with atp, mse                                                                             |
| 310 | 1aqe  | 41 | 63 | 1.37 | 48696 | complexed with hem, so4; mutant                                                                     |
| 311 | 1fp2A | 41 | 63 | 1.37 | 63475 | complexed with hmo, sah                                                                             |
| 312 | 1cvuA | 41 | 63 | 1.37 | 48132 | None                                                                                                |
| 313 | 1jymA | 41 | 63 | 1.37 | 56421 | None                                                                                                |
| 314 | 1bdb  | 41 | 63 | 1.37 | 51751 | complexed with nad                                                                                  |
| 315 | 1n08A | 41 | 63 | 1.37 | 82115 | None                                                                                                |
| 316 | 1fgkA | 41 | 63 | 1.37 | 88854 | None                                                                                                |
| 317 | 1iw4A | 41 | 63 | 1.37 | 57468 | None                                                                                                |
| 318 | 1iy8A | 41 | 63 | 1.37 | 51751 | None                                                                                                |
| 319 | 1l7vC | 40 | 60 | 1.39 | 52686 | None                                                                                                |
| 320 | 1f5nA | 40 | 60 | 1.39 | 48341 | complexed with gnp, mg; mutant                                                                      |
| 321 | 4htcI | 40 | 60 | 1.39 | 57270 | complexed with nag                                                                                  |
| 322 | 1nvrA | 40 | 60 | 1.39 | 88854 | complex with peptide, chain B                                                                       |
| 323 | 1kx5C | 40 | 60 | 1.39 | 47114 | None                                                                                                |
| 324 | 1dec  | 40 | 60 | 1.39 | 57270 | None                                                                                                |
| 325 | 1etpA | 40 | 60 | 1.39 | 46680 | None                                                                                                |
| 326 | 1gsoA | 40 | 60 | 1.39 | 51247 | mutant                                                                                              |
| 327 | 1kvkA | 40 | 60 | 1.39 | 54232 | complexed with atp, mg                                                                              |
| 328 | 1roo  | 40 | 60 | 1.39 | 57547 | None                                                                                                |
| 329 | 2bbg  | 40 | 60 | 1.39 | 57297 | None                                                                                                |
| 330 | 1ffyA | 40 | 60 | 1.39 | 47324 | protein/RNA complex; complexed with k, mo2, mo4, mo5, mo6, mrc, zn                                  |
| 331 | 1efuB | 40 | 60 | 1.39 | 63423 | None                                                                                                |
| 332 | 1aozA | 40 | 60 | 1.39 | 49550 | None                                                                                                |
| 333 | 1n3lA | 40 | 60 | 1.39 | 52375 | mini-TyrRS; anticodon recognition part is more divergent; secreted cytokine with IL-8-like activity |
| 334 | 1j3bA | 40 | 60 | 1.39 | 53796 | None                                                                                                |
| 335 | 1i25A | 40 | 60 | 1.39 | 57072 | None                                                                                                |
| 336 | 1o8bA | 40 | 60 | 1.39 | 75176 | None                                                                                                |
| 337 | 1o8bA | 40 | 60 | 1.39 | 75176 | None                                                                                                |
| 338 | 1n6bA | 40 | 60 | 1.39 | 48265 | complexed with dmz, hem, so4                                                                        |
| 339 | 1dn0B | 40 | 60 | 1.39 | 48727 | None                                                                                                |
| 340 | 1g13A | 40 | 60 | 1.39 | 63708 | None                                                                                                |
| 341 | 1obbA | 40 | 60 | 1.39 | 51848 | None                                                                                                |
| 342 | 1kv9A | 40 | 60 | 1.39 | 68952 | complexed with acn, ca, epe, gol, hem, pqq                                                          |
| 343 | 1ajsA | 40 | 60 | 1.39 | 53384 | None                                                                                                |
| 344 | 1bx4A | 40 | 60 | 1.39 | 53614 | complexed with adn, cl, mo4, mo6                                                                    |
| 345 | 1qupA | 40 | 60 | 1.39 | 49330 | None                                                                                                |
| 346 | 1df0A | 40 | 60 | 1.39 | 63550 | mutant                                                                                              |
| 347 | 1k30A | 40 | 60 | 1.39 | 69594 | None                                                                                                |
| 348 | 1in4A | 40 | 60 | 1.39 | 46819 | complexed with act, adp, co, hez                                                                    |
| 349 | 1l8wA | 40 | 60 | 1.39 | 74749 | None                                                                                                |
| 350 | 1ehyA | 40 | 60 | 1.39 | 53525 | None                                                                                                |
| 351 | 1kcp  | 40 | 60 | 1.39 | 57060 | complexed with nh2                                                                                  |
| 352 | 3ladA | 40 | 60 | 1.39 | 51943 | None                                                                                                |



|     |       |    |    |      |       |                                                                      |
|-----|-------|----|----|------|-------|----------------------------------------------------------------------|
| 353 | 1kqhA | 40 | 60 | 1.39 | 57072 | None                                                                 |
| 354 | 1dbhA | 40 | 60 | 1.39 | 48066 | None                                                                 |
| 355 | 1lqrA | 40 | 60 | 1.39 | 57072 | None                                                                 |
| 356 | 1m5wA | 40 | 60 | 1.39 | 63893 | None                                                                 |
| 357 | 1bxdA | 40 | 60 | 1.39 | 55884 | complexed with anp                                                   |
| 358 | 1epuA | 40 | 60 | 1.39 | 56816 | None                                                                 |
| 359 | 1jkzA | 40 | 60 | 1.39 | 57170 | None                                                                 |
| 360 | 1lqvA | 40 | 60 | 1.39 | 54453 | None                                                                 |
| 361 | 1faq  | 40 | 60 | 1.39 | 57890 | complexed with zn                                                    |
| 362 | 1b16A | 40 | 60 | 1.39 | 51751 | None                                                                 |
| 363 | 1bndA | 40 | 60 | 1.39 | 57520 | heterodimer with NT3                                                 |
| 364 | 1befA | 40 | 60 | 1.39 | 50596 | None                                                                 |
| 365 | 1afp  | 40 | 60 | 1.39 | 57599 | None                                                                 |
| 366 | 1jp3A | 40 | 60 | 1.39 | 64006 | None                                                                 |
| 367 | 1c4eA | 40 | 60 | 1.39 | 57049 | None                                                                 |
| 368 | 1gvhA | 40 | 60 | 1.39 | 46463 | complexed with cl, fad, hem, na                                      |
| 369 | 1gg4A | 40 | 60 | 1.39 | 63419 | None                                                                 |
| 370 | 1jmxA | 40 | 60 | 1.39 | 68956 | None                                                                 |
| 371 | 1nm3A | 40 | 60 | 1.39 | 52834 | None                                                                 |
| 372 | 1dqeA | 40 | 60 | 1.39 | 47566 | None                                                                 |
| 373 | 1hbkA | 40 | 60 | 1.39 | 47028 | complexed with coa, myr, ni                                          |
| 374 | 1npyA | 40 | 60 | 1.39 | 51883 | None                                                                 |
| 375 | 1g9gA | 40 | 60 | 1.39 | 48213 | complexed with ca, mg                                                |
| 376 | 1ezvA | 40 | 60 | 1.39 | 63412 | None                                                                 |
| 377 | 1g8eA | 40 | 60 | 1.39 | 63593 | None                                                                 |
| 378 | 1hykA | 40 | 60 | 1.39 | 57056 | None                                                                 |
| 379 | 1paa  | 40 | 60 | 1.39 | 57668 | C-terminal domain                                                    |
| 380 | 1fs0G | 40 | 60 | 1.39 | 52944 | complexed to the epsilon subunit; the coiled-coil part is disordered |
| 381 | 1fhjB | 40 | 60 | 1.39 | 46463 | None                                                                 |
| 382 | 1iw7C | 40 | 60 | 1.39 | 64485 | None                                                                 |
| 383 | 1m0wA | 40 | 60 | 1.39 | 52460 | None                                                                 |
| 384 | 1uxy  | 40 | 60 | 1.39 | 56184 | complexed with epu, fad; mutant                                      |
| 385 | 1dc1A | 40 | 60 | 1.39 | 53011 | None                                                                 |
| 386 | 1d6bA | 40 | 60 | 1.39 | 57393 | None                                                                 |
| 387 | 1lkxA | 40 | 60 | 1.39 | 52641 | None                                                                 |
| 388 | 1dtx  | 40 | 60 | 1.39 | 57363 | complexed with so4                                                   |
| 389 | 1tubB | 40 | 60 | 1.39 | 52491 | complexed with gdp, gtp, txl                                         |
| 390 | 1aoa  | 40 | 60 | 1.39 | 47577 | None                                                                 |
| 391 | 1nkvA | 40 | 60 | 1.39 | 82469 | None                                                                 |
| 392 | 1m6nA | 40 | 60 | 1.39 | 81768 | complexed with so4                                                   |
| 393 | 1m6nA | 40 | 60 | 1.39 | 81768 | complexed with so4                                                   |
| 394 | 1h0hA | 40 | 60 | 1.39 | 50696 | None                                                                 |
| 395 | 1h1oA | 40 | 60 | 1.39 | 46680 | None                                                                 |
| 396 | 1ihkA | 40 | 60 | 1.39 | 50354 | complexed with po4                                                   |
| 397 | 1mj3A | 40 | 60 | 1.39 | 52103 | None                                                                 |
| 398 | 1dzkA | 40 | 60 | 1.39 | 50815 | None                                                                 |
| 399 | 1kthA | 40 | 60 | 1.39 | 57363 | complexed with po4                                                   |

|     |       |    |    |      |       |      |
|-----|-------|----|----|------|-------|------|
| 400 | 1cnoA | 40 | 60 | 1.39 | 46627 | None |
|-----|-------|----|----|------|-------|------|
