# Supplementary material
Source: PubMed Central journal article supplement (PMC7126412)
Supplement: mmc4.pdf [file mmc4.pdf]

## Recognition of ATP binding sites by searching the ASTRAL dataset.

The Table presents a list of proteins (top 400) whose binding sites were recognized to be similar to the ATP binding site of the “hypothetical” protein MJ0577 (1mjh). The proteins are listed in order of decreasing similarity to the query binding site.

| Rank | PDB code | Match Score | t-score | p-value | SCOP Family | SCOP Remarks                                                                    |
|------|----------|-------------|---------|---------|-------------|---------------------------------------------------------------------------------|
| 1    | 1mjhA    | 100         | 273     | 0.02    | 52436       | complexed with atp                                                              |
| 2    | 1o97C    | 44          | 90      | 1.30    | 52432       | complexed with amp, fad                                                         |
| 3    | 1efvB    | 42          | 84      | 1.35    | 52432       | complexed with amp, fad                                                         |
| 4    | 1iw7D    | 40          | 77      | 1.39    | 64490       | None                                                                            |
| 5    | 1jqnA    | 40          | 77      | 1.39    | 51632       | complexed with asp, dco, mn                                                     |
| 6    | 1n7vA    | 39          | 74      | 1.42    | 89429       | complexed with act, ca                                                          |
| 7    | 1ihuA    | 39          | 74      | 1.42    | 52652       | None                                                                            |
| 8    | 1i0zA    | 39          | 74      | 1.42    | 51848       | None                                                                            |
| 9    | 3grs     | 39          | 74      | 1.42    | 51943       | None                                                                            |
| 10   | 1lldA    | 39          | 74      | 1.42    | 51848       | None                                                                            |
| 11   | 1ldm     | 38          | 71      | 1.44    | 51848       | complexed with nad, oxm                                                         |
| 12   | 1ufhA    | 38          | 71      | 1.44    | 55730       | None                                                                            |
| 13   | 1nvmB    | 38          | 71      | 1.44    | 51800       | None                                                                            |
| 14   | 1n6bA    | 38          | 71      | 1.44    | 48265       | complexed with dmz, hem, so4                                                    |
| 15   | 1d0cA    | 38          | 71      | 1.44    | 56513       | None                                                                            |
| 16   | 1qkrA    | 38          | 71      | 1.44    | 47221       | None                                                                            |
| 17   | 1rgs     | 38          | 71      | 1.44    | 51210       | None                                                                            |
| 18   | 1hjzA    | 38          | 71      | 1.44    | 89724       | None                                                                            |
| 19   | 1e3hA    | 38          | 71      | 1.44    | 46916       | complexed with so4                                                              |
| 20   | 1ng7A    | 38          | 71      | 1.44    | 89044       | None                                                                            |
| 21   | 1jmvA    | 38          | 71      | 1.44    | 52436       | None                                                                            |
| 22   | 1hyuA    | 38          | 71      | 1.44    | 51943       | None                                                                            |
| 23   | 1ja1A    | 38          | 71      | 1.44    | 50438       | None                                                                            |
| 24   | 1cipA    | 38          | 71      | 1.44    | 47896       | complexed with gnp, mg                                                          |
| 25   | 1bjbA    | 38          | 71      | 1.44    | 49159       | a single-chain construct with epsilon chain domain, includes part of the linker |
| 26   | 1lnzA    | 38          | 71      | 1.44    | 82052       | None                                                                            |
| 27   | 1ek6A    | 38          | 71      | 1.44    | 51751       | None                                                                            |
| 28   | 1trb     | 38          | 71      | 1.44    | 51943       | None                                                                            |
| 29   | 1hyeA    | 37          | 68      | 1.46    | 51848       | complexed with nap                                                              |
| 30   | 1af7     | 37          | 68      | 1.46    | 47758       | complexed with sah                                                              |
| 31   | 1onfA    | 37          | 68      | 1.46    | 51943       | None                                                                            |
| 32   | 1o0sA    | 37          | 68      | 1.46    | 51883       | None                                                                            |
| 33   | 1lh0A    | 37          | 68      | 1.46    | 53272       | None                                                                            |
| 34   | 1mdbA    | 37          | 68      | 1.46    | 56802       | complexed with amp, dbh, so4                                                    |
| 35   | 2pia     | 37          | 68      | 1.46    | 63381       | complexed with fes, fmn                                                         |
| 36   | 1jyeA    | 37          | 68      | 1.46    | 53823       | complexed with gol; mutant                                                      |
| 37   | 1cgmE    | 37          | 68      | 1.46    | 47196       | None                                                                            |
| 38   | 1ni3A    | 37          | 68      | 1.46    | 52592       | complexed with mse, so4                                                         |

|    |       |    |    |      |       |                                                                                                                         |
|----|-------|----|----|------|-------|-------------------------------------------------------------------------------------------------------------------------|
| 39 | lgehA | 37 | 68 | 1.46 | 51650 | None                                                                                                                    |
| 40 | locyA | 37 | 68 | 1.46 | 88875 | complexed with cit, so4, zn                                                                                             |
| 41 | le9xA | 37 | 68 | 1.46 | 48265 | complexed with hem, pim; mutant                                                                                         |
| 42 | lfurA | 37 | 68 | 1.46 | 48558 | None                                                                                                                    |
| 43 | lnp7A | 37 | 68 | 1.46 | 48174 | None                                                                                                                    |
| 44 | ll7vA | 37 | 68 | 1.46 | 75648 | None                                                                                                                    |
| 45 | 1k4zA | 37 | 68 | 1.46 | 69341 | None                                                                                                                    |
| 46 | lj7lA | 37 | 68 | 1.46 | 64411 | None                                                                                                                    |
| 47 | lby5A | 37 | 68 | 1.46 | 56948 | complexed with c8e, fe, orn                                                                                             |
| 48 | 1k32A | 37 | 68 | 1.46 | 68933 | None                                                                                                                    |
| 49 | lrypD | 37 | 68 | 1.46 | 56251 | None                                                                                                                    |
| 50 | ldabA | 37 | 68 | 1.46 | 51153 | None                                                                                                                    |
| 51 | lnkr  | 37 | 68 | 1.46 | 49159 | None                                                                                                                    |
| 52 | lazsC | 37 | 68 | 1.46 | 47896 | complexed with fkp, gsp, mg; mutant                                                                                     |
| 53 | lfo4A | 37 | 68 | 1.46 | 47742 | None                                                                                                                    |
| 54 | linp  | 37 | 68 | 1.46 | 56656 | complexed with mg                                                                                                       |
| 55 | lkekA | 37 | 68 | 1.46 | 88746 | None                                                                                                                    |
| 56 | ldgtB | 36 | 64 | 1.49 | 47786 | complexed with amp, zn                                                                                                  |
| 57 | lmswD | 36 | 64 | 1.49 | 56691 | elongation complex; shows dramatic conformational changes in the transition from initiation to elongation transcription |
| 58 | lcliA | 36 | 64 | 1.49 | 55327 | None                                                                                                                    |
| 59 | lqorA | 36 | 64 | 1.49 | 50136 | None                                                                                                                    |
| 60 | lkk8A | 36 | 64 | 1.49 | 50085 | complexed with adp, bef, ca, gol, mg; mutant                                                                            |
| 61 | 3pmgA | 36 | 64 | 1.49 | 53739 | None                                                                                                                    |
| 62 | lezvA | 36 | 64 | 1.49 | 63412 | None                                                                                                                    |
| 63 | ldzlA | 36 | 64 | 1.49 | 88649 | mutant                                                                                                                  |
| 64 | ldl6A | 36 | 64 | 1.49 | 57784 | complexed with zn                                                                                                       |
| 65 | lldnA | 36 | 64 | 1.49 | 51848 | None                                                                                                                    |
| 66 | llfpA | 36 | 64 | 1.49 | 75626 | structural genomics                                                                                                     |
| 67 | lb35A | 36 | 64 | 1.49 | 88634 | None                                                                                                                    |
| 68 | la8o  | 36 | 64 | 1.49 | 47354 | mutant                                                                                                                  |
| 69 | lky9B | 36 | 64 | 1.49 | 74933 | None                                                                                                                    |
| 70 | lp3hA | 36 | 64 | 1.49 | 50130 | None                                                                                                                    |
| 71 | lhy0A | 36 | 64 | 1.49 | 48558 | None                                                                                                                    |
| 72 | lm6nA | 36 | 64 | 1.49 | 81768 | complexed with so4                                                                                                      |
| 73 | 2pii  | 36 | 64 | 1.49 | 54914 | None                                                                                                                    |
| 74 | 2mysA | 36 | 64 | 1.49 | 50085 | complexed with mg, mly, so4                                                                                             |
| 75 | lkzqA | 36 | 64 | 1.49 | 74878 | None                                                                                                                    |
| 76 | lfmk  | 36 | 64 | 1.49 | 50045 | None                                                                                                                    |
| 77 | ljfbA | 36 | 64 | 1.49 | 48265 | complexed with gol, hem                                                                                                 |
| 78 | ljhdA | 36 | 64 | 1.49 | 63801 | complexed with br, so4                                                                                                  |
| 79 | ln12A | 36 | 64 | 1.49 | 49405 | None                                                                                                                    |
| 80 | li12A | 36 | 64 | 1.49 | 55730 | None                                                                                                                    |
| 81 | lhwxA | 36 | 64 | 1.49 | 51883 | None                                                                                                                    |
| 82 | lfftC | 36 | 64 | 1.49 | 81451 | None                                                                                                                    |

|     |       |    |    |      |       |                                                                       |
|-----|-------|----|----|------|-------|-----------------------------------------------------------------------|
| 83  | 1fy7A | 36 | 64 | 1.49 | 55730 | complexed with coa, na                                                |
| 84  | 1esc  | 36 | 64 | 1.49 | 52267 | None                                                                  |
| 85  | 1ftt  | 36 | 64 | 1.49 | 46690 | None                                                                  |
| 86  | 1kmoA | 36 | 64 | 1.49 | 56948 | complexed with hto, lda                                               |
| 87  | 1m4uA | 36 | 64 | 1.49 | 82904 | complexed with nag                                                    |
| 88  | 1p5hA | 36 | 64 | 1.49 | 89797 | None                                                                  |
| 89  | 1e19A | 36 | 64 | 1.49 | 53634 | None                                                                  |
| 90  | 1mt5A | 36 | 64 | 1.49 | 75305 | None                                                                  |
| 91  | 1f8nA | 36 | 64 | 1.49 | 48485 | complexed with fe2                                                    |
| 92  | 1e8cA | 36 | 64 | 1.49 | 63419 | None                                                                  |
| 93  | 1jchA | 36 | 64 | 1.49 | 63841 | None                                                                  |
| 94  | 1bx4A | 36 | 64 | 1.49 | 53614 | complexed with adn, cl, mo4, mo6                                      |
| 95  | 1fmb  | 36 | 64 | 1.49 | 50631 | complexed with hyb; mutant                                            |
| 96  | 1qhxA | 36 | 64 | 1.49 | 52569 | complexed with atp, mg                                                |
| 97  | 1cydA | 36 | 64 | 1.49 | 51751 | None                                                                  |
| 98  | 1n7dA | 36 | 64 | 1.49 | 63826 | complexed with ca, keg, man, nag; mutant                              |
| 99  | 1gteA | 36 | 64 | 1.49 | 46553 | None                                                                  |
| 100 | 1kqpA | 36 | 64 | 1.49 | 52403 | None                                                                  |
| 101 | 1cjwA | 36 | 64 | 1.49 | 55730 | complexed with cot                                                    |
| 102 | 1k0mA | 36 | 64 | 1.49 | 47617 | None                                                                  |
| 103 | 1epwA | 36 | 64 | 1.49 | 49956 | complexed with so4, zn                                                |
| 104 | 1h29A | 36 | 64 | 1.49 | 48696 | None                                                                  |
| 105 | 1dmuA | 36 | 64 | 1.49 | 52990 | None                                                                  |
| 106 | 1ejdA | 36 | 64 | 1.49 | 55209 | None                                                                  |
| 107 | 1ns5A | 36 | 64 | 1.49 | 82371 | None                                                                  |
| 108 | 1m32A | 36 | 64 | 1.49 | 53402 | None                                                                  |
| 109 | 1h30A | 36 | 64 | 1.49 | 49944 | None                                                                  |
| 110 | 1i5zA | 36 | 64 | 1.49 | 46796 | None                                                                  |
| 111 | 1qczA | 36 | 64 | 1.49 | 52256 | None                                                                  |
| 112 | 1mxiA | 36 | 64 | 1.49 | 75218 | complexed with iod, sah                                               |
| 113 | 1pf4A | 36 | 64 | 1.49 | 52686 | None                                                                  |
| 114 | 2trcP | 36 | 64 | 1.49 | 52888 | complexed with gd                                                     |
| 115 | 1n97A | 36 | 64 | 1.49 | 48265 | None                                                                  |
| 116 | 1f2A  | 36 | 64 | 1.49 | 51943 | None                                                                  |
| 117 | 1ih7A | 36 | 64 | 1.49 | 53118 | complexed with gmp, k                                                 |
| 118 | 451c  | 36 | 64 | 1.49 | 46627 | complexed with hem                                                    |
| 119 | 1he7A | 36 | 64 | 1.49 | 49159 | swapped N-terminal strand dimer; only one subunit is in the PDB entry |
| 120 | 1jilA | 36 | 64 | 1.49 | 52375 | complexed with 485                                                    |
| 121 | 1h6kA | 36 | 64 | 1.49 | 48385 | None                                                                  |
| 122 | 3btaA | 36 | 64 | 1.49 | 49956 | complexed with zn                                                     |
| 123 | 1rkd  | 36 | 64 | 1.49 | 53614 | complexed with adp, po4, rib                                          |
| 124 | 1hzfA | 36 | 64 | 1.49 | 48251 | complexed with mse                                                    |
| 125 | 1cvuA | 36 | 64 | 1.49 | 48132 | None                                                                  |
| 126 | 1gz5A | 36 | 64 | 1.49 | 82540 | None                                                                  |
| 127 | 1fxoA | 36 | 64 | 1.49 | 53464 | None                                                                  |
| 128 | 1qm9A | 36 | 64 | 1.49 | 54929 | None                                                                  |

|     |       |    |    |      |       |                                                        |
|-----|-------|----|----|------|-------|--------------------------------------------------------|
| 129 | 1lbvA | 36 | 64 | 1.49 | 56656 | None                                                   |
| 130 | 1qlaA | 36 | 64 | 1.49 | 46978 | None                                                   |
| 131 | 2cy3  | 36 | 64 | 1.49 | 48696 | complexed with hem                                     |
| 132 | 1h41A | 36 | 64 | 1.49 | 82253 | None                                                   |
| 133 | 1i7nA | 36 | 64 | 1.49 | 52463 | None                                                   |
| 134 | 1nxiA | 36 | 64 | 1.49 | 89947 | structural genomics                                    |
| 135 | 1kyqA | 36 | 64 | 1.49 | 75110 | None                                                   |
| 136 | 1jvbA | 36 | 64 | 1.49 | 50136 | complexed with mse, zn                                 |
| 137 | 1fecA | 36 | 64 | 1.49 | 51943 | None                                                   |
| 138 | 1ojt  | 36 | 64 | 1.49 | 51943 | None                                                   |
| 139 | 1k4nA | 36 | 64 | 1.49 | 75396 | structural genomics                                    |
| 140 | 1ky9A | 36 | 64 | 1.49 | 74933 | None                                                   |
| 141 | 1o22A | 36 | 64 | 1.49 | 90065 | structural genomics                                    |
| 142 | 1jvr  | 36 | 64 | 1.49 | 47842 | None                                                   |
| 143 | 1mqsa | 36 | 64 | 1.49 | 56816 | complexed with an N-terminal peptide of sed5p, chain B |
| 144 | 1i7pA | 36 | 64 | 1.49 | 63381 | complexed with fad                                     |
| 145 | 1chmA | 36 | 64 | 1.49 | 53093 | None                                                   |
| 146 | 1d7yA | 36 | 64 | 1.49 | 51943 | None                                                   |
| 147 | 1pswA | 36 | 64 | 1.49 | 89784 | structural genomics                                    |
| 148 | 1d4aA | 36 | 64 | 1.49 | 52235 | None                                                   |
| 149 | 1jlnA | 36 | 64 | 1.49 | 53851 | None                                                   |
| 150 | 1ivyA | 36 | 64 | 1.49 | 53499 | None                                                   |
| 151 | 1jc4A | 36 | 64 | 1.49 | 64257 | None                                                   |
| 152 | 1e79A | 36 | 64 | 1.49 | 47918 | None                                                   |
| 153 | 2tpsA | 36 | 64 | 1.49 | 51392 | None                                                   |
| 154 | 1iknD | 36 | 64 | 1.49 | 48404 | None                                                   |
| 155 | 1fepA | 36 | 64 | 1.49 | 56948 | None                                                   |
| 156 | 1gz0A | 36 | 64 | 1.49 | 75218 | None                                                   |
| 157 | 1qbkB | 36 | 64 | 1.49 | 48372 | complexed with gnp, mg                                 |
| 158 | 1hriA | 36 | 64 | 1.49 | 48648 | complexed with cholesterol                             |
| 159 | 1gw5B | 36 | 64 | 1.49 | 74771 | complexed with ihp                                     |
| 160 | 1kv3A | 36 | 64 | 1.49 | 81289 | None                                                   |
| 161 | 1c8dA | 36 | 64 | 1.49 | 88646 | complexed with ca                                      |
| 162 | 19hcA | 36 | 64 | 1.49 | 48696 | None                                                   |
| 163 | 1d0nA | 36 | 64 | 1.49 | 55754 | None                                                   |
| 164 | 1l11A | 36 | 64 | 1.49 | 75131 | None                                                   |
| 165 | 1kbiA | 36 | 64 | 1.49 | 51396 | complexed with fmm, hem, mpd, po4, pyr                 |
| 166 | 3cyr  | 36 | 64 | 1.49 | 48696 | complexed with hem                                     |
| 167 | 1n9pA | 35 | 61 | 1.51 | 81966 | complexed with mse                                     |
| 168 | 1f8fA | 35 | 61 | 1.51 | 50136 | complexed with eoh, nah, so4, zn                       |
| 169 | 1i58A | 35 | 61 | 1.51 | 55884 | None                                                   |
| 170 | 1qamA | 35 | 61 | 1.51 | 88784 | complexed with act                                     |
| 171 | 1e5kA | 35 | 61 | 1.51 | 53470 | complexed with cit, li                                 |
| 172 | 1j6zA | 35 | 61 | 1.51 | 53068 | None                                                   |
| 173 | 1m6iA | 35 | 61 | 1.51 | 51943 | None                                                   |
| 174 | 1j4nA | 35 | 61 | 1.51 | 56895 | complexed with bng                                     |

|     |       |    |    |      |       |                                                                    |
|-----|-------|----|----|------|-------|--------------------------------------------------------------------|
| 175 | 1i50A | 35 | 61 | 1.51 | 64485 | complexed with mn, zn                                              |
| 176 | 1k3rA | 35 | 61 | 1.51 | 74955 | None                                                               |
| 177 | 1hynP | 35 | 61 | 1.51 | 64362 | None                                                               |
| 178 | 1byi  | 35 | 61 | 1.51 | 52652 | None                                                               |
| 179 | 1k92A | 35 | 61 | 1.51 | 52403 | complexed with cry, so4; mutant                                    |
| 180 | 1iqvA | 35 | 61 | 1.51 | 47974 | None                                                               |
| 181 | 1fftB | 35 | 61 | 1.51 | 49541 | None                                                               |
| 182 | 1j0mA | 35 | 61 | 1.51 | 48234 | complexed with ca                                                  |
| 183 | 1ebdA | 35 | 61 | 1.51 | 51943 | None                                                               |
| 184 | 1gkuB | 35 | 61 | 1.51 | 69496 | None                                                               |
| 185 | 1n62C | 35 | 61 | 1.51 | 55448 | None                                                               |
| 186 | 1m7sA | 35 | 61 | 1.51 | 56635 | None                                                               |
| 187 | 1hm9A | 35 | 61 | 1.51 | 51171 | None                                                               |
| 188 | 1m1cA | 35 | 61 | 1.51 | 82857 | None                                                               |
| 189 | 1gg3A | 35 | 61 | 1.51 | 47032 | None                                                               |
| 190 | 1k3kA | 35 | 61 | 1.51 | 56855 | mutant                                                             |
| 191 | 1kliH | 35 | 61 | 1.51 | 50514 | complexed with ben, ca, gol, so4                                   |
| 192 | 1qb7A | 35 | 61 | 1.51 | 53272 | complexed with ade, cit, mg                                        |
| 193 | 1gk8A | 35 | 61 | 1.51 | 51650 | None                                                               |
| 194 | 1io7A | 35 | 61 | 1.51 | 48265 | None                                                               |
| 195 | 1c8bA | 35 | 61 | 1.51 | 64095 | None                                                               |
| 196 | 1fc6A | 35 | 61 | 1.51 | 68933 | mutant                                                             |
| 197 | 1nuyA | 35 | 61 | 1.51 | 56656 | complexed with f6p, mg, pi                                         |
| 198 | 1k28A | 35 | 61 | 1.51 | 69256 | complexed with k, po4                                              |
| 199 | 1hdoA | 35 | 61 | 1.51 | 51751 | complexed with nap                                                 |
| 200 | 1fgjA | 35 | 61 | 1.51 | 48711 | None                                                               |
| 201 | 1qo8A | 35 | 61 | 1.51 | 48711 | None                                                               |
| 202 | 1qi9A | 35 | 61 | 1.51 | 48321 | None                                                               |
| 203 | 1qj5A | 35 | 61 | 1.51 | 53417 | None                                                               |
| 204 | 2rspA | 35 | 61 | 1.51 | 50631 | None                                                               |
| 205 | 1mdc  | 35 | 61 | 1.51 | 50847 | complexed with plm, so4                                            |
| 206 | 1eyqA | 35 | 61 | 1.51 | 54627 | None                                                               |
| 207 | 1ni5A | 35 | 61 | 1.51 | 82359 | complexed with mse                                                 |
| 208 | 1hh5A | 35 | 61 | 1.51 | 48696 | complexed with hec                                                 |
| 209 | 1oxwA | 35 | 61 | 1.51 | 89729 | None                                                               |
| 210 | 1jgtA | 35 | 61 | 1.51 | 52403 | None                                                               |
| 211 | 1k9oI | 35 | 61 | 1.51 | 56575 | Michaelis serpin-trypsin complex                                   |
| 212 | 1ksiA | 35 | 61 | 1.51 | 49999 | None                                                               |
| 213 | 1dxrC | 35 | 61 | 1.51 | 48707 | complexed with bcb, bpb, fe2, hec, lda, mq9, mst, ns5, so4; mutant |
| 214 | 1gosA | 35 | 61 | 1.51 | 51913 | None                                                               |
| 215 | 1dceA | 35 | 61 | 1.51 | 48440 | None                                                               |
| 216 | 1bhgA | 35 | 61 | 1.51 | 49304 | None                                                               |
| 217 | 1i52A | 35 | 61 | 1.51 | 68901 | complexed with ca, ctp, mg                                         |
| 218 | 1kssA | 35 | 61 | 1.51 | 48711 | complexed with fad, fum, hem, na; mutant                           |
| 219 | 1f8mA | 35 | 61 | 1.51 | 88704 | None                                                               |
| 220 | 1i6lA | 35 | 61 | 1.51 | 52375 | complexed with gol, nh4, so4, tym                                  |

|     |       |    |    |      |       |                                                                    |
|-----|-------|----|----|------|-------|--------------------------------------------------------------------|
| 221 | 1h6vA | 35 | 61 | 1.51 | 51943 | None                                                               |
| 222 | 1g9mG | 35 | 61 | 1.51 | 56503 | complexed with fuc, ioh, nag; mutant                               |
| 223 | 1luxy | 35 | 61 | 1.51 | 56184 | complexed with epu, fad; mutant                                    |
| 224 | 1hr6A | 35 | 61 | 1.51 | 63412 | None                                                               |
| 225 | 1iwgA | 35 | 61 | 1.51 | 82694 | None                                                               |
| 226 | 1pfo  | 35 | 61 | 1.51 | 56979 | None                                                               |
| 227 | 1klfB | 35 | 61 | 1.51 | 49405 | None                                                               |
| 228 | 1gdnA | 35 | 61 | 1.51 | 50514 | complexed with gol, so4                                            |
| 229 | 1o2dA | 35 | 61 | 1.51 | 69892 | None                                                               |
| 230 | 1hh2P | 35 | 61 | 1.51 | 50282 | None                                                               |
| 231 | 1adn  | 35 | 61 | 1.51 | 57885 | complexed with zn                                                  |
| 232 | 1edoA | 35 | 61 | 1.51 | 51751 | complexed with nap                                                 |
| 233 | 2shpA | 35 | 61 | 1.51 | 52805 | None                                                               |
| 234 | 1ffyA | 35 | 61 | 1.51 | 47324 | protein/RNA complex; complexed with k, mo2, mo4, mo5, mo6, mrc, zn |
| 235 | 1bif  | 35 | 61 | 1.51 | 52589 | complexed with atg, gol, mg, po4; mutant                           |
| 236 | 1dekA | 35 | 61 | 1.51 | 52541 | None                                                               |
| 237 | 1lfkA | 35 | 61 | 1.51 | 48265 | complexed with hem                                                 |
| 238 | 1azsA | 35 | 61 | 1.51 | 55074 | complexed with fkp, gsp, mg; mutant                                |
| 239 | 1ko7A | 35 | 61 | 1.51 | 75139 | None                                                               |
| 240 | 1zakA | 35 | 61 | 1.51 | 52541 | None                                                               |
| 241 | 1k3pA | 35 | 61 | 1.51 | 48257 | None                                                               |
| 242 | 1d4bA | 35 | 61 | 1.51 | 54278 | None                                                               |
| 243 | 1mbyA | 35 | 61 | 1.51 | 82616 | None                                                               |
| 244 | 1iz0A | 35 | 61 | 1.51 | 50136 | complexed with mse, so4                                            |
| 245 | 1b04A | 35 | 61 | 1.51 | 56096 | None                                                               |
| 246 | 1o8aA | 35 | 61 | 1.51 | 55505 | complexed with act, cl, nag, ndg, nxa, zn                          |
| 247 | 1ni4B | 35 | 61 | 1.51 | 88741 | None                                                               |
| 248 | 1fgyA | 35 | 61 | 1.51 | 50730 | complexed with 4ip                                                 |
| 249 | 1nqeA | 35 | 61 | 1.51 | 56948 | complexed with c8e, mg                                             |
| 250 | 7odcA | 35 | 61 | 1.51 | 88683 | complexed with plp; mutant                                         |
| 251 | 1hrkA | 35 | 61 | 1.51 | 53801 | None                                                               |
| 252 | 1tubB | 35 | 61 | 1.51 | 52491 | complexed with gdp, gtp, txl                                       |
| 253 | 1bhtA | 35 | 61 | 1.51 | 57415 | None                                                               |
| 254 | 1odmA | 35 | 61 | 1.51 | 51198 | complexed with asv, fe2, so4                                       |
| 255 | 1bdb  | 35 | 61 | 1.51 | 51751 | complexed with nad                                                 |
| 256 | 1ca1  | 35 | 61 | 1.51 | 48538 | complexed with cd, zn                                              |
| 257 | 1ksfX | 35 | 61 | 1.51 | 81924 | complexed with adp, ioh, met, mg, pge; mutant                      |
| 258 | 1gkrA | 35 | 61 | 1.51 | 75044 | None                                                               |
| 259 | 4fiv  | 35 | 61 | 1.51 | 50631 | complexed with 1ni                                                 |
| 260 | 1itwA | 35 | 61 | 1.51 | 82526 | None                                                               |
| 261 | 1n7hA | 35 | 61 | 1.51 | 51751 | None                                                               |
| 262 | 1gp1A | 35 | 61 | 1.51 | 52901 | None                                                               |
| 263 | 1hskA | 35 | 61 | 1.51 | 56184 | complexed with fad                                                 |
| 264 | 1lshA | 35 | 61 | 1.51 | 48432 | complexed with pca, pld, upl                                       |

|     |       |    |    |      |       |                                                                      |
|-----|-------|----|----|------|-------|----------------------------------------------------------------------|
| 265 | 1kk6A | 35 | 61 | 1.51 | 51168 | None                                                                 |
| 266 | 1du2A | 35 | 61 | 1.51 | 46576 | None                                                                 |
| 267 | 1fs0G | 35 | 61 | 1.51 | 52944 | complexed to the epsilon subunit; the coiled-coil part is disordered |
| 268 | 1mi1A | 35 | 61 | 1.51 | 81838 | None                                                                 |
| 269 | 1n5uA | 35 | 61 | 1.51 | 48553 | None                                                                 |
| 270 | 1vdc  | 35 | 61 | 1.51 | 51943 | None                                                                 |
| 271 | 1e5pA | 35 | 61 | 1.51 | 50815 | None                                                                 |
| 272 | 1rdr  | 35 | 61 | 1.51 | 56694 | complexed with ca                                                    |
| 273 | 1aop  | 35 | 61 | 1.51 | 55125 | None                                                                 |
| 274 | 1hxhA | 35 | 61 | 1.51 | 51751 | None                                                                 |
| 275 | 1ecrA | 35 | 61 | 1.51 | 56597 | protein/DNA complex                                                  |
| 276 | 2tbvA | 35 | 61 | 1.51 | 88643 | None                                                                 |
| 277 | 1gwiA | 35 | 61 | 1.51 | 48265 | None                                                                 |
| 278 | 1cby  | 35 | 61 | 1.51 | 55677 | None                                                                 |
| 279 | 1pda  | 35 | 61 | 1.51 | 53851 | complexed with acy, dpm                                              |
| 280 | 1dmtA | 35 | 61 | 1.51 | 55502 | complexed with gol, nag, rdf, zn                                     |
| 281 | 1f1sA | 35 | 61 | 1.51 | 48234 | None                                                                 |
| 282 | 1h4vB | 35 | 61 | 1.51 | 52955 | complexed with so4                                                   |
| 283 | 1b8oA | 35 | 61 | 1.51 | 53168 | complexed with imh, mg, po4                                          |
| 284 | 1ja9A | 35 | 61 | 1.51 | 51751 | complexed with ndp, pyq                                              |
| 285 | 1gz2A | 35 | 61 | 1.51 | 56437 | complexed with sep                                                   |
| 286 | 1uayA | 35 | 61 | 1.51 | 51751 | None                                                                 |
| 287 | 1gy8A | 35 | 61 | 1.51 | 51751 | None                                                                 |
| 288 | 1l1qA | 35 | 61 | 1.51 | 53272 | complexed with 9da, so4                                              |
| 289 | 1n62A | 35 | 61 | 1.51 | 47742 | None                                                                 |
| 290 | 1umuA | 35 | 61 | 1.51 | 51307 | None                                                                 |
| 291 | 1eovA | 35 | 61 | 1.51 | 50250 | None                                                                 |
| 292 | 1hdcA | 35 | 61 | 1.51 | 51751 | None                                                                 |
| 293 | 1g0dA | 35 | 61 | 1.51 | 81289 | complexed with so4                                                   |
| 294 | 1e6uA | 35 | 61 | 1.51 | 51751 | complexed with nap, so4, trs, uvw                                    |
| 295 | 1f5nA | 35 | 61 | 1.51 | 48341 | complexed with gnp, mg; mutant                                       |
| 296 | 1i16  | 35 | 61 | 1.51 | 50172 | None                                                                 |
| 297 | 1a49A | 35 | 61 | 1.51 | 50801 | None                                                                 |
| 298 | 1egaA | 35 | 61 | 1.51 | 52592 | None                                                                 |
| 299 | 1jymA | 35 | 61 | 1.51 | 56421 | None                                                                 |
| 300 | 1aozA | 35 | 61 | 1.51 | 49550 | None                                                                 |
| 301 | 1ciy  | 35 | 61 | 1.51 | 49796 | None                                                                 |
| 302 | 1j5sA | 35 | 61 | 1.51 | 75082 | None                                                                 |
| 303 | 1ihmA | 35 | 61 | 1.51 | 88637 | None                                                                 |
| 304 | 1chuA | 35 | 61 | 1.51 | 46978 | None                                                                 |
| 305 | 1psdA | 35 | 61 | 1.51 | 51830 | None                                                                 |
| 306 | 1pymA | 35 | 61 | 1.51 | 88704 | None                                                                 |
| 307 | 1i50B | 35 | 61 | 1.51 | 64490 | complexed with mn, zn                                                |
| 308 | 1tgoA | 35 | 61 | 1.51 | 53118 | None                                                                 |
| 309 | 1j6uA | 35 | 61 | 1.51 | 51985 | structural genomics                                                  |
| 310 | 1cfr  | 35 | 61 | 1.51 | 52999 | None                                                                 |
| 311 | 1dosA | 35 | 61 | 1.51 | 51591 | None                                                                 |

|     |       |    |    |      |       |                                           |
|-----|-------|----|----|------|-------|-------------------------------------------|
| 312 | 2cmd  | 35 | 61 | 1.51 | 51848 | complexed with cit                        |
| 313 | 1bgxT | 35 | 61 | 1.51 | 47808 | None                                      |
| 314 | 1lla  | 35 | 61 | 1.51 | 48051 | complexed with cl, cu, na                 |
| 315 | 1mpp  | 35 | 61 | 1.51 | 50646 | complexed with so4                        |
| 316 | 1mpp  | 35 | 61 | 1.51 | 50646 | complexed with so4                        |
| 317 | 2prgA | 35 | 61 | 1.51 | 48509 | None                                      |
| 318 | 1kzkA | 35 | 61 | 1.51 | 50631 | None                                      |
| 319 | 1tubA | 35 | 61 | 1.51 | 52491 | complexed with gdp, gtp, txl              |
| 320 | 1lw7A | 35 | 61 | 1.51 | 52397 | complexed with mse, nad, so4              |
| 321 | 1khvA | 35 | 61 | 1.51 | 56694 | None                                      |
| 322 | 1jg1A | 35 | 61 | 1.51 | 53354 | complexed with sah                        |
| 323 | 1h65A | 35 | 61 | 1.51 | 52592 | None                                      |
| 324 | 1ngvA | 35 | 61 | 1.51 | 89763 | None                                      |
| 325 | 1jmsA | 35 | 61 | 1.51 | 47803 | complexed with mg, na                     |
| 326 | 1f0xA | 35 | 61 | 1.51 | 55109 | None                                      |
| 327 | 1ezvB | 35 | 61 | 1.51 | 63412 | None                                      |
| 328 | 1dnv  | 35 | 61 | 1.51 | 88647 | None                                      |
| 329 | 1gkmA | 35 | 61 | 1.51 | 48572 | complexed with cys, gol, oxo, so4; mutant |
| 330 | 1mkiA | 35 | 61 | 1.51 | 90084 | None                                      |
| 331 | 2hhmA | 35 | 61 | 1.51 | 56656 | None                                      |
| 332 | 1ofdA | 35 | 61 | 1.51 | 69337 | None                                      |
| 333 | 1jogA | 35 | 61 | 1.51 | 81740 | None                                      |
| 334 | 1jboB | 35 | 61 | 1.51 | 46532 | complexed with cyc, men                   |
| 335 | 1hetA | 35 | 61 | 1.51 | 50136 | None                                      |
| 336 | 1g2nA | 35 | 61 | 1.51 | 48509 | complexed with eph                        |
| 337 | 1mslA | 35 | 61 | 1.51 | 81329 | None                                      |
| 338 | 1gweA | 35 | 61 | 1.51 | 56635 | complexed with hem, so4                   |
| 339 | 1njfA | 35 | 61 | 1.51 | 81269 | None                                      |
| 340 | 1kbvA | 35 | 61 | 1.51 | 49550 | None                                      |
| 341 | 1guzA | 35 | 61 | 1.51 | 51848 | None                                      |
| 342 | 1j18A | 35 | 61 | 1.51 | 49453 | complexed with acy, ca, glc, so4          |
| 343 | 1jj21 | 35 | 61 | 1.51 | 48663 | complexed with cd, cl, k, mg, na          |
| 344 | 1l8qA | 35 | 61 | 1.51 | 81695 | complexed with adp, mg, mse               |
| 345 | 1et9A | 35 | 61 | 1.51 | 50219 | None                                      |
| 346 | 2ae2A | 35 | 61 | 1.51 | 51751 | None                                      |
| 347 | 1kwgA | 35 | 61 | 1.51 | 51012 | complexed with act, cl, mpd, zn           |
| 348 | 1hyrC | 35 | 61 | 1.51 | 48942 | None                                      |
| 349 | 1dz4A | 35 | 61 | 1.51 | 48265 | None                                      |
| 350 | 1io1A | 35 | 61 | 1.51 | 64519 | mutant                                    |
| 351 | 1jscA | 35 | 61 | 1.51 | 52475 | None                                      |
| 352 | 1jwiB | 35 | 61 | 1.51 | 56437 | None                                      |
| 353 | 1i6aA | 35 | 61 | 1.51 | 53851 | mutant                                    |
| 354 | 1qkiA | 35 | 61 | 1.51 | 51800 | None                                      |
| 355 | 1bvsA | 34 | 58 | 1.53 | 46930 | None                                      |
| 356 | 1tml  | 34 | 58 | 1.53 | 51990 | complexed with so4                        |
| 357 | 2pspA | 34 | 58 | 1.53 | 57493 | None                                      |
| 358 | 1cjyA | 34 | 58 | 1.53 | 49563 | None                                      |



|     |       |    |    |      |       |                                       |
|-----|-------|----|----|------|-------|---------------------------------------|
| 359 | livhA | 34 | 58 | 1.53 | 47204 | None                                  |
| 360 | liqpA | 34 | 58 | 1.53 | 48020 | None                                  |
| 361 | lfn4A | 34 | 58 | 1.53 | 55962 | complexed with dho                    |
| 362 | lmpxA | 34 | 58 | 1.53 | 69222 | None                                  |
| 363 | lj33A | 34 | 58 | 1.53 | 52734 | mutant                                |
| 364 | lk0rA | 34 | 58 | 1.53 | 50282 | None                                  |
| 365 | lga8A | 34 | 58 | 1.53 | 53458 | complexed with del, mn, upf; mutant   |
| 366 | lshcA | 34 | 58 | 1.53 | 50755 | None                                  |
| 367 | lliiA | 34 | 58 | 1.53 | 53614 | complexed with acp, adn, cl, mg       |
| 368 | lnbaA | 34 | 58 | 1.53 | 52500 | None                                  |
| 369 | lex4A | 34 | 58 | 1.53 | 50123 | None                                  |
| 370 | lgz8A | 34 | 58 | 1.53 | 88854 | complexed with csw, mbp               |
| 371 | lji0A | 34 | 58 | 1.53 | 52686 | complexed with atp, mse               |
| 372 | liml  | 34 | 58 | 1.53 | 57736 | None                                  |
| 373 | lbouA | 34 | 58 | 1.53 | 48077 | None                                  |
| 374 | la3wA | 34 | 58 | 1.53 | 50801 | None                                  |
| 375 | lko9A | 34 | 58 | 1.53 | 48157 | complexed with so4                    |
| 376 | lceqA | 34 | 58 | 1.53 | 51848 | None                                  |
| 377 | lk75A | 34 | 58 | 1.53 | 69602 | None                                  |
| 378 | lfuiA | 34 | 58 | 1.53 | 50444 | None                                  |
| 379 | lng2A | 34 | 58 | 1.53 | 50045 | None                                  |
| 380 | lkb0A | 34 | 58 | 1.53 | 68952 | complexed with ca, gol, hec, pqq, tfb |
| 381 | loacA | 34 | 58 | 1.53 | 49999 | None                                  |
| 382 | loedC | 34 | 58 | 1.53 | 90113 | None                                  |
| 383 | lmxtA | 34 | 58 | 1.53 | 51913 | atomic resolution structure           |
| 384 | ljevB | 34 | 58 | 1.53 | 64505 | None                                  |
| 385 | li7oA | 34 | 58 | 1.53 | 56530 | None                                  |
| 386 | li7oA | 34 | 58 | 1.53 | 56530 | None                                  |
| 387 | lkyA  | 34 | 58 | 1.53 | 49800 | None                                  |
| 388 | lhtyA | 34 | 58 | 1.53 | 88693 | complexed with mpd, nag, trs, zn      |
| 389 | ll5jA | 34 | 58 | 1.53 | 74779 | None                                  |
| 390 | lkagA | 34 | 58 | 1.53 | 52566 | None                                  |
| 391 | lqe3A | 34 | 58 | 1.53 | 53475 | complexed with so4, zn                |
| 392 | le3mA | 34 | 58 | 1.53 | 48335 | None                                  |
| 393 | lgcoA | 34 | 58 | 1.53 | 51751 | None                                  |
| 394 | lezvC | 34 | 58 | 1.53 | 81647 | complexed with fes, hem, sma, uq6     |
| 395 | lg10A | 34 | 58 | 1.53 | 56030 | None                                  |
| 396 | lan4A | 34 | 58 | 1.53 | 47460 | None                                  |
| 397 | li1iP | 34 | 58 | 1.53 | 55505 | complexed with zn                     |
| 398 | le58A | 34 | 58 | 1.53 | 53255 | complexed with cl, phs, so4; mutant   |
| 399 | lczaN | 34 | 58 | 1.53 | 53083 | None                                  |
| 400 | lfnhA | 34 | 58 | 1.53 | 49266 | None                                  |
