# Supplementary material
Source: PubMed Central journal article supplement (PMC7126412)
Supplement: mmc5.pdf [file mmc5.pdf]

## Inferring the function of a “hypothetical” protein MJ0226 by searching the AS-TRAL dataset with a bound form (2mjp).

The Table presents a list of proteins (top 400) whose binding sites were recognized to be similar to the ANP binding site of the “hypothetical” protein MJ0226 (2mjp). The proteins are listed in order of decreasing similarity to the query binding site.

| Rank | PDB code | Match Score | t-score | p-value | SCOP Family | SCOP Remarks                                                       |
|------|----------|-------------|---------|---------|-------------|--------------------------------------------------------------------|
| 1    | 2mjpA    | 100         | 304     | 0.02    | 52973       | structural genomics                                                |
| 2    | 1b78A    | 79          | 228     | 0.50    | 52973       | None                                                               |
| 3    | 1k7kA    | 43          | 97      | 1.33    | 52973       | complexed with mse                                                 |
| 4    | 1j6wA    | 39          | 82      | 1.42    | 64294       | None                                                               |
| 5    | 1larA    | 37          | 75      | 1.46    | 52805       | None                                                               |
| 6    | 1aky     | 36          | 71      | 1.49    | 52541       | complexed with ap5, imd                                            |
| 7    | 3caoA    | 36          | 71      | 1.49    | 48696       | complexed with ars, cgn, hem, zn                                   |
| 8    | 1b35A    | 36          | 71      | 1.49    | 88634       | None                                                               |
| 9    | 1pf4A    | 36          | 71      | 1.49    | 52686       | None                                                               |
| 10   | 1n08A    | 36          | 71      | 1.49    | 82115       | None                                                               |
| 11   | 1azsC    | 36          | 71      | 1.49    | 47896       | complexed with fkp, gsp, mg; mutant                                |
| 12   | 1ly1A    | 36          | 71      | 1.49    | 52541       | complexed with so4                                                 |
| 13   | 1kyqA    | 36          | 71      | 1.49    | 75110       | None                                                               |
| 14   | 1h29A    | 36          | 71      | 1.49    | 48696       | None                                                               |
| 15   | 1iv8A    | 36          | 71      | 1.49    | 51012       | complexed with mly, mlz                                            |
| 16   | 1dxrH    | 36          | 71      | 1.49    | 50347       | complexed with bcb, bpb, fe2, hec, lda, mq9, mst, ns5, so4; mutant |
| 17   | 1pvc1    | 35          | 68      | 1.51    | 88634       | complexed with myr, sph                                            |
| 18   | 1g40A    | 35          | 68      | 1.51    | 57536       | None                                                               |
| 19   | 1fo4A    | 35          | 68      | 1.51    | 47742       | None                                                               |
| 20   | 1kk8A    | 35          | 68      | 1.51    | 50085       | complexed with adp, bef, ca, gol, mg; mutant                       |
| 21   | 1knvA    | 35          | 68      | 1.51    | 52999       | None                                                               |
| 22   | 1n7hA    | 35          | 68      | 1.51    | 51751       | None                                                               |
| 23   | 1hskA    | 35          | 68      | 1.51    | 56184       | complexed with fad                                                 |
| 24   | 3btaA    | 35          | 68      | 1.51    | 49956       | complexed with zn                                                  |
| 25   | 1a0cA    | 35          | 68      | 1.51    | 51665       | None                                                               |
| 26   | 1hv8A    | 35          | 68      | 1.51    | 81268       | None                                                               |
| 27   | 1cipA    | 35          | 68      | 1.51    | 47896       | complexed with gnp, mg                                             |
| 28   | 1qkrA    | 35          | 68      | 1.51    | 47221       | None                                                               |
| 29   | 1ec7A    | 35          | 68      | 1.51    | 51609       | None                                                               |
| 30   | 1hyuA    | 35          | 68      | 1.51    | 51943       | None                                                               |
| 31   | 1fgjA    | 35          | 68      | 1.51    | 48711       | None                                                               |
| 32   | 1j34A    | 35          | 68      | 1.51    | 56437       | complexed with ca, cgu, mg                                         |
| 33   | 1jjuA    | 35          | 68      | 1.51    | 68956       | None                                                               |
| 34   | 1ng2A    | 35          | 68      | 1.51    | 50045       | None                                                               |
| 35   | 1t7pA    | 35          | 68      | 1.51    | 53118       | protein/DNA complex; complexed with 2da, dg3, mg; mutant           |
| 36   | 1lfpA    | 35          | 68      | 1.51    | 75626       | structural genomics                                                |

|    |       |    |    |      |       |                                                                                                 |
|----|-------|----|----|------|-------|-------------------------------------------------------------------------------------------------|
| 37 | 1ltqA | 35 | 68 | 1.51 | 82385 | complexed with adp, dms, mse                                                                    |
| 38 | 1i50A | 35 | 68 | 1.51 | 64485 | complexed with mn, zn                                                                           |
| 39 | 1qbkB | 35 | 68 | 1.51 | 48372 | complexed with gnp, mg                                                                          |
| 40 | 1befA | 35 | 68 | 1.51 | 50596 | None                                                                                            |
| 41 | 1gsiA | 35 | 68 | 1.51 | 52541 | complexed with act, mg, so4, tmp                                                                |
| 42 | 1i7oA | 35 | 68 | 1.51 | 56530 | None                                                                                            |
| 43 | 1ocyA | 34 | 64 | 1.53 | 88875 | complexed with cit, so4, zn                                                                     |
| 44 | 1iw7C | 34 | 64 | 1.53 | 64485 | None                                                                                            |
| 45 | 1n10A | 34 | 64 | 1.53 | 49591 | None                                                                                            |
| 46 | 1kekA | 34 | 64 | 1.53 | 88746 | None                                                                                            |
| 47 | 1gyoA | 34 | 64 | 1.53 | 48696 | None                                                                                            |
| 48 | 1a81A | 34 | 64 | 1.53 | 55551 | None                                                                                            |
| 49 | 1n7dA | 34 | 64 | 1.53 | 63826 | complexed with ca, keg, man, nag; mutant                                                        |
| 50 | 1rypD | 34 | 64 | 1.53 | 56251 | None                                                                                            |
| 51 | 1c8dA | 34 | 64 | 1.53 | 88646 | complexed with ca                                                                               |
| 52 | 1ek6A | 34 | 64 | 1.53 | 51751 | None                                                                                            |
| 53 | 1dx5I | 34 | 64 | 1.53 | 57197 | None                                                                                            |
| 54 | 3aky  | 34 | 64 | 1.53 | 52541 | complexed with ap5, imd; mutant                                                                 |
| 55 | 1jc4A | 34 | 64 | 1.53 | 64257 | None                                                                                            |
| 56 | 2btvA | 34 | 64 | 1.53 | 56832 | None                                                                                            |
| 57 | 1h0hA | 34 | 64 | 1.53 | 50696 | None                                                                                            |
| 58 | 1esmA | 34 | 64 | 1.53 | 52584 | None                                                                                            |
| 59 | 1nslA | 34 | 64 | 1.53 | 55730 | None                                                                                            |
| 60 | 1ih7A | 34 | 64 | 1.53 | 53118 | complexed with gmp, k                                                                           |
| 61 | 1ja1A | 34 | 64 | 1.53 | 50438 | None                                                                                            |
| 62 | 1k9oI | 34 | 64 | 1.53 | 56575 | Michaelis serpin-trypsin complex                                                                |
| 63 | 1mdbA | 34 | 64 | 1.53 | 56802 | complexed with amp, dbh, so4                                                                    |
| 64 | 1kx5B | 34 | 64 | 1.53 | 47114 | None                                                                                            |
| 65 | 1mkeA | 34 | 64 | 1.53 | 50767 | pseudo complex: fusion protein with a WIP peptide (res. 1-25) and a linker peptide (res. 26-30) |
| 66 | 1e3hA | 34 | 64 | 1.53 | 46916 | complexed with so4                                                                              |
| 67 | 1ft5A | 34 | 64 | 1.53 | 48711 | complexed with hem, ips                                                                         |
| 68 | 1fepA | 34 | 64 | 1.53 | 56948 | None                                                                                            |
| 69 | 1iw7D | 34 | 64 | 1.53 | 64490 | None                                                                                            |
| 70 | 1i50I | 34 | 64 | 1.53 | 57784 | None                                                                                            |
| 71 | 1qj5A | 34 | 64 | 1.53 | 53417 | None                                                                                            |
| 72 | 1g6oA | 34 | 64 | 1.53 | 52670 | None                                                                                            |
| 73 | 2uagA | 34 | 64 | 1.53 | 51985 | complexed with adp, mg, uma                                                                     |
| 74 | 1i50B | 34 | 64 | 1.53 | 64490 | complexed with mn, zn                                                                           |
| 75 | 1ng7A | 34 | 64 | 1.53 | 89044 | None                                                                                            |
| 76 | 1pswA | 34 | 64 | 1.53 | 89784 | structural genomics                                                                             |
| 77 | 1k94A | 34 | 64 | 1.53 | 63550 | None                                                                                            |
| 78 | 1jqgA | 34 | 64 | 1.53 | 53188 | complexed with zn                                                                               |
| 79 | 1nfp  | 34 | 64 | 1.53 | 51683 | complexed with fmn, myr, so4                                                                    |
| 80 | 2pia  | 34 | 64 | 1.53 | 63381 | complexed with fes, fmn                                                                         |
| 81 | 1aozA | 34 | 64 | 1.53 | 49550 | None                                                                                            |

|     |       |    |    |      |       |                                                                                 |
|-----|-------|----|----|------|-------|---------------------------------------------------------------------------------|
| 82  | 1gdhA | 34 | 64 | 1.53 | 51830 | None                                                                            |
| 83  | 1l11A | 34 | 64 | 1.53 | 75131 | None                                                                            |
| 84  | 1j5sA | 34 | 64 | 1.53 | 75082 | None                                                                            |
| 85  | 1setA | 34 | 64 | 1.53 | 46590 | None                                                                            |
| 86  | 1bg2  | 34 | 64 | 1.53 | 52641 | complexed with act, adp, mg                                                     |
| 87  | 1kskA | 34 | 64 | 1.53 | 75459 | None                                                                            |
| 88  | 1lw7A | 34 | 64 | 1.53 | 52397 | complexed with mse, nad, so4                                                    |
| 89  | 1jeqA | 34 | 64 | 1.53 | 68907 | None                                                                            |
| 90  | 1bg1A | 34 | 64 | 1.53 | 47656 | protein/DNA complex                                                             |
| 91  | 1jwiB | 34 | 64 | 1.53 | 56437 | None                                                                            |
| 92  | 1a8p  | 34 | 64 | 1.53 | 63381 | complexed with fad                                                              |
| 93  | 1kjqA | 34 | 64 | 1.53 | 51247 | None                                                                            |
| 94  | 2u2fA | 34 | 64 | 1.53 | 54929 | second RNA-binding domain                                                       |
| 95  | 1dquA | 34 | 64 | 1.53 | 88704 | None                                                                            |
| 96  | 1m4uA | 34 | 64 | 1.53 | 82904 | complexed with nag                                                              |
| 97  | 1dnt  | 34 | 64 | 1.53 | 88647 | None                                                                            |
| 98  | 1i12A | 34 | 64 | 1.53 | 55730 | None                                                                            |
| 99  | 1e7wA | 34 | 64 | 1.53 | 51751 | None                                                                            |
| 100 | 2dpmA | 34 | 64 | 1.53 | 88788 | complexed with hg, sam                                                          |
| 101 | 1j1nA | 34 | 64 | 1.53 | 53851 | None                                                                            |
| 102 | 1hs6A | 34 | 64 | 1.53 | 63608 | complexed with act, bes, imd, yb, zn                                            |
| 103 | 1mjhA | 34 | 64 | 1.53 | 52436 | None                                                                            |
| 104 | 1d0nA | 34 | 64 | 1.53 | 55754 | None                                                                            |
| 105 | 1nqeA | 34 | 64 | 1.53 | 56948 | complexed with c8e, mg                                                          |
| 106 | 19hcA | 34 | 64 | 1.53 | 48696 | None                                                                            |
| 107 | 1vpsA | 34 | 64 | 1.53 | 88649 | None                                                                            |
| 108 | 1pb7A | 34 | 64 | 1.53 | 53851 | complexed with gly                                                              |
| 109 | 1k6wA | 34 | 64 | 1.53 | 69373 | complexed with fe                                                               |
| 110 | 1o6lA | 34 | 64 | 1.53 | 88854 | complexed with anp, mn, tpo; mutant                                             |
| 111 | 1vfrA | 34 | 64 | 1.53 | 55470 | None                                                                            |
| 112 | 1k0mA | 34 | 64 | 1.53 | 47617 | None                                                                            |
| 113 | 1k1xA | 34 | 64 | 1.53 | 89013 | None                                                                            |
| 114 | 1n7oA | 34 | 64 | 1.53 | 48234 | mutant                                                                          |
| 115 | 2pii  | 34 | 64 | 1.53 | 54914 | None                                                                            |
| 116 | 1bjbA | 34 | 64 | 1.53 | 49159 | a single-chain construct with epsilon chain domain, includes part of the linker |
| 117 | 1g8mA | 34 | 64 | 1.53 | 63971 | None                                                                            |
| 118 | 1i8tA | 34 | 64 | 1.53 | 69427 | None                                                                            |
| 119 | 1mixA | 34 | 64 | 1.53 | 47032 | None                                                                            |
| 120 | 1gqeA | 34 | 64 | 1.53 | 75621 | complexed with mse; mutant                                                      |
| 121 | 1nijA | 34 | 64 | 1.53 | 52652 | CASP5                                                                           |
| 122 | 1kqpA | 34 | 64 | 1.53 | 52403 | None                                                                            |
| 123 | 1h99A | 34 | 64 | 1.53 | 63521 | None                                                                            |
| 124 | 1d9nA | 34 | 64 | 1.53 | 54178 | None                                                                            |
| 125 | 1h6kA | 34 | 64 | 1.53 | 48385 | None                                                                            |
| 126 | 1dzlA | 34 | 64 | 1.53 | 88649 | mutant                                                                          |
| 127 | 1j7lA | 34 | 64 | 1.53 | 64411 | None                                                                            |

|     |       |    |    |      |       |                                                  |
|-----|-------|----|----|------|-------|--------------------------------------------------|
| 128 | luby  | 34 | 64 | 1.53 | 48577 | complexed with dma, mg; mutant                   |
| 129 | lgl4A | 34 | 64 | 1.53 | 64244 | complexed with epe, zn                           |
| 130 | livsA | 34 | 64 | 1.53 | 81635 | None                                             |
| 131 | lgmeA | 34 | 64 | 1.53 | 49765 | None                                             |
| 132 | lksiA | 34 | 64 | 1.53 | 49999 | None                                             |
| 133 | li78A | 34 | 64 | 1.53 | 69918 | None                                             |
| 134 | ljnrB | 34 | 64 | 1.53 | 54884 | None                                             |
| 135 | ldar  | 34 | 64 | 1.53 | 50448 | complexed with gdp                               |
| 136 | luxy  | 34 | 64 | 1.53 | 56184 | complexed with epu, fad; mutant                  |
| 137 | llldA | 34 | 64 | 1.53 | 51848 | None                                             |
| 138 | livwA | 34 | 64 | 1.53 | 49999 | None                                             |
| 139 | ljm6A | 34 | 64 | 1.53 | 69013 | None                                             |
| 140 | le8gA | 33 | 60 | 1.55 | 55104 | None                                             |
| 141 | le8cA | 33 | 60 | 1.55 | 63419 | None                                             |
| 142 | ldfmA | 33 | 60 | 1.55 | 52993 | None                                             |
| 143 | ljv1A | 33 | 60 | 1.55 | 53461 | None                                             |
| 144 | lja9A | 33 | 60 | 1.55 | 51751 | complexed with ndp, pyq                          |
| 145 | lihuA | 33 | 60 | 1.55 | 52652 | None                                             |
| 146 | llkxA | 33 | 60 | 1.55 | 52641 | None                                             |
| 147 | lg60A | 33 | 60 | 1.55 | 53377 | None                                             |
| 148 | laye  | 33 | 60 | 1.55 | 53188 | procarboxypeptidase A2                           |
| 149 | lbvp1 | 33 | 60 | 1.55 | 48346 | None                                             |
| 150 | lj9aA | 33 | 60 | 1.55 | 53118 | CASP4                                            |
| 151 | ldekA | 33 | 60 | 1.55 | 52541 | None                                             |
| 152 | lmukA | 33 | 60 | 1.55 | 56694 | None                                             |
| 153 | lp16A | 33 | 60 | 1.55 | 50307 | None                                             |
| 154 | lj0mA | 33 | 60 | 1.55 | 48234 | complexed with ca                                |
| 155 | loacA | 33 | 60 | 1.55 | 49999 | None                                             |
| 156 | legaA | 33 | 60 | 1.55 | 52592 | None                                             |
| 157 | ldro  | 33 | 60 | 1.55 | 50730 | None                                             |
| 158 | lmpiA | 33 | 60 | 1.55 | 49971 | complexed with nag                               |
| 159 | lhz4A | 33 | 60 | 1.55 | 69094 | complexed with bez, gol, so4                     |
| 160 | 7reqA | 33 | 60 | 1.55 | 51704 | None                                             |
| 161 | lgk8A | 33 | 60 | 1.55 | 51650 | None                                             |
| 162 | ldgtB | 33 | 60 | 1.55 | 47786 | complexed with amp, zn                           |
| 163 | lksfX | 33 | 60 | 1.55 | 81924 | complexed with adp, ioh, met, mg, pge;<br>mutant |
| 164 | lfknA | 33 | 60 | 1.55 | 50646 | None                                             |
| 165 | ljj2C | 33 | 60 | 1.55 | 52167 | complexed with cd, cl, k, mg, na                 |
| 166 | lgm5A | 33 | 60 | 1.55 | 69009 | complexed with adp, mg                           |
| 167 | lfftC | 33 | 60 | 1.55 | 81451 | None                                             |
| 168 | lgwuA | 33 | 60 | 1.55 | 48114 | complexed with act, ca, hem, na; mu-<br>tant     |
| 169 | lojt  | 33 | 60 | 1.55 | 51943 | None                                             |
| 170 | lchuA | 33 | 60 | 1.55 | 46978 | None                                             |
| 171 | lvdc  | 33 | 60 | 1.55 | 51943 | None                                             |
| 172 | lb5tA | 33 | 60 | 1.55 | 51731 | None                                             |
| 173 | ltrb  | 33 | 60 | 1.55 | 51943 | None                                             |

|     |       |    |    |      |       |                                        |
|-----|-------|----|----|------|-------|----------------------------------------|
| 174 | 2bpa2 | 33 | 60 | 1.55 | 49612 | None                                   |
| 175 | 1i6lA | 33 | 60 | 1.55 | 52375 | complexed with gol, nh4, so4, tym      |
| 176 | 1k3pA | 33 | 60 | 1.55 | 48257 | None                                   |
| 177 | 1kmoA | 33 | 60 | 1.55 | 56948 | complexed with hto, lda                |
| 178 | 1f0xA | 33 | 60 | 1.55 | 55109 | None                                   |
| 179 | 1k8tA | 33 | 60 | 1.55 | 69887 | complexed with ni, so4                 |
| 180 | 1f0lA | 33 | 60 | 1.55 | 49381 | None                                   |
| 181 | 1d7qA | 33 | 60 | 1.55 | 50282 | None                                   |
| 182 | 1lvk  | 33 | 60 | 1.55 | 50085 | complexed with bef, mg, mnt; mutant    |
| 183 | 1dmtA | 33 | 60 | 1.55 | 55502 | complexed with gol, nag, rdf, zn       |
| 184 | 1by5A | 33 | 60 | 1.55 | 56948 | complexed with c8e, fe, orn            |
| 185 | 1jeyA | 33 | 60 | 1.55 | 64502 | None                                   |
| 186 | 1onfA | 33 | 60 | 1.55 | 51943 | None                                   |
| 187 | 1c8uA | 33 | 60 | 1.55 | 54644 | None                                   |
| 188 | 1ps1A | 33 | 60 | 1.55 | 48586 | None                                   |
| 189 | 1jyKA | 33 | 60 | 1.55 | 68901 | None                                   |
| 190 | 1l0lB | 33 | 60 | 1.55 | 63412 | None                                   |
| 191 | 1fp0A | 33 | 60 | 1.55 | 57911 | complexed with zn                      |
| 192 | 1j58A | 33 | 60 | 1.55 | 51187 | complexed with fnt, mg, mn, mse        |
| 193 | 1qp8A | 33 | 60 | 1.55 | 51830 | None                                   |
| 194 | 2oatA | 33 | 60 | 1.55 | 53417 | None                                   |
| 195 | 1lshA | 33 | 60 | 1.55 | 48432 | complexed with pca, pld, upl           |
| 196 | 1ktkE | 33 | 60 | 1.55 | 48727 | None                                   |
| 197 | 1a06  | 33 | 60 | 1.55 | 88854 | None                                   |
| 198 | 1dabA | 33 | 60 | 1.55 | 51153 | None                                   |
| 199 | 1bupA | 33 | 60 | 1.55 | 53068 | None                                   |
| 200 | 1e8xA | 33 | 60 | 1.55 | 48399 | complexed with atp, lu; mutant         |
| 201 | 1hr6A | 33 | 60 | 1.55 | 63412 | None                                   |
| 202 | 1gp6A | 33 | 60 | 1.55 | 51198 | complexed with dh2, fe2, mes, que, sin |
| 203 | 1kmvA | 33 | 60 | 1.55 | 53598 | complexed with dms, lli, ndp, sul      |
| 204 | 4fiv  | 33 | 60 | 1.55 | 50631 | complexed with lni                     |
| 205 | 1byb  | 33 | 60 | 1.55 | 51446 | complexed with glc, so4                |
| 206 | 1f13A | 33 | 60 | 1.55 | 81289 | None                                   |
| 207 | 1zakA | 33 | 60 | 1.55 | 52541 | None                                   |
| 208 | 1oaa  | 33 | 60 | 1.55 | 51751 | complexed with nap, oaa, so4           |
| 209 | 1gxeA | 33 | 60 | 1.55 | 49159 | None                                   |
| 210 | 1mg2D | 33 | 60 | 1.55 | 46627 | None                                   |
| 211 | 1fjeB | 33 | 60 | 1.55 | 54929 | None                                   |
| 212 | 1bfd  | 33 | 60 | 1.55 | 52475 | complexed with ca, mg, tpp             |
| 213 | 1fs7A | 33 | 60 | 1.55 | 48711 | complexed with act, ca, hem, y1        |
| 214 | 1tdj  | 33 | 60 | 1.55 | 53687 | CASP2                                  |
| 215 | 1c8zA | 33 | 60 | 1.55 | 54519 | None                                   |
| 216 | 1mh9A | 33 | 60 | 1.55 | 82382 | complexed with mg, po4                 |
| 217 | 1mh9A | 33 | 60 | 1.55 | 82382 | complexed with mg, po4                 |
| 218 | 1hm9A | 33 | 60 | 1.55 | 51171 | None                                   |
| 219 | 1jscA | 33 | 60 | 1.55 | 52475 | None                                   |
| 220 | 1ngvA | 33 | 60 | 1.55 | 89763 | None                                   |
| 221 | 1fiuA | 33 | 60 | 1.55 | 53008 | None                                   |

|     |       |    |    |      |       |                                     |
|-----|-------|----|----|------|-------|-------------------------------------|
| 222 | 1aqcA | 33 | 60 | 1.55 | 50755 | None                                |
| 223 | 1inp  | 33 | 60 | 1.55 | 56656 | complexed with mg                   |
| 224 | 1xvaA | 33 | 60 | 1.55 | 53348 | None                                |
| 225 | 1k24A | 33 | 60 | 1.55 | 75651 | complexed with 1pe, zn              |
| 226 | 1l8qA | 33 | 60 | 1.55 | 81695 | complexed with adp, mg, mse         |
| 227 | 1j6zA | 33 | 60 | 1.55 | 53068 | None                                |
| 228 | 1hqsA | 33 | 60 | 1.55 | 53660 | None                                |
| 229 | 1i52A | 33 | 60 | 1.55 | 68901 | complexed with ca, ctp, mg          |
| 230 | 1tgoA | 33 | 60 | 1.55 | 53118 | None                                |
| 231 | 1qsmA | 33 | 60 | 1.55 | 55730 | None                                |
| 232 | 1kncA | 33 | 60 | 1.55 | 69119 | None                                |
| 233 | 1h5qA | 33 | 60 | 1.55 | 51751 | None                                |
| 234 | 1j8uA | 33 | 60 | 1.55 | 56535 | complexed with fe2, thb             |
| 235 | 1o0sA | 33 | 60 | 1.55 | 51883 | None                                |
| 236 | 2tpsA | 33 | 60 | 1.55 | 51392 | None                                |
| 237 | 1e44B | 33 | 60 | 1.55 | 63841 | complexed with edo                  |
| 238 | 1c0mA | 33 | 60 | 1.55 | 50123 | None                                |
| 239 | 1nw9B | 33 | 60 | 1.55 | 52130 | complexed to the xiap-bir3          |
| 240 | 1p3dA | 33 | 60 | 1.55 | 51985 | None                                |
| 241 | 1fmk  | 33 | 60 | 1.55 | 50045 | None                                |
| 242 | 1h7sA | 33 | 60 | 1.55 | 54224 | None                                |
| 243 | 1kzhA | 33 | 60 | 1.55 | 53785 | None                                |
| 244 | 1zin  | 33 | 60 | 1.55 | 52541 | complexed with ap5, zn              |
| 245 | 1jeyB | 33 | 60 | 1.55 | 64505 | None                                |
| 246 | 2cy3  | 33 | 60 | 1.55 | 48696 | complexed with hem                  |
| 247 | 1f2A  | 33 | 60 | 1.55 | 51943 | None                                |
| 248 | 1f52A | 33 | 60 | 1.55 | 54369 | None                                |
| 249 | 1mvfD | 33 | 60 | 1.55 | 89448 | None                                |
| 250 | 1mtyD | 33 | 60 | 1.55 | 47253 | None                                |
| 251 | 1g5aA | 33 | 60 | 1.55 | 51012 | complexed with epe, na, trs         |
| 252 | 1l0lA | 33 | 60 | 1.55 | 63412 | None                                |
| 253 | 1dnpA | 33 | 60 | 1.55 | 48174 | None                                |
| 254 | 1ni5A | 33 | 60 | 1.55 | 82359 | complexed with mse                  |
| 255 | 1o97D | 33 | 60 | 1.55 | 52432 | complexed with amp, fad             |
| 256 | 1e58A | 33 | 60 | 1.55 | 53255 | complexed with cl, phs, so4; mutant |
| 257 | 1gteA | 33 | 60 | 1.55 | 46553 | None                                |
| 258 | 1m1qA | 33 | 60 | 1.55 | 48711 | complexed with hem, sul             |
| 259 | 1iwgA | 33 | 60 | 1.55 | 82694 | None                                |
| 260 | 1ni3A | 33 | 60 | 1.55 | 52592 | complexed with mse, so4             |
| 261 | 1g0sA | 33 | 60 | 1.55 | 55812 | None                                |
| 262 | 1gh9A | 33 | 60 | 1.55 | 57822 | None                                |
| 263 | 1e8uA | 33 | 60 | 1.55 | 50940 | None                                |
| 264 | 1kr4A | 33 | 60 | 1.55 | 75434 | structural genomics                 |
| 265 | 1chmA | 33 | 60 | 1.55 | 53093 | None                                |
| 266 | 1gkuB | 33 | 60 | 1.55 | 69496 | None                                |
| 267 | 1hr6B | 33 | 60 | 1.55 | 63412 | None                                |
| 268 | 1kutA | 33 | 60 | 1.55 | 56105 | None                                |
| 269 | 1itwA | 33 | 60 | 1.55 | 82526 | None                                |

|     |       |    |    |      |       |                                                         |
|-----|-------|----|----|------|-------|---------------------------------------------------------|
| 270 | 12asA | 33 | 60 | 1.55 | 55682 | None                                                    |
| 271 | 1qgwA | 33 | 60 | 1.55 | 56569 | None                                                    |
| 272 | 1ct9A | 33 | 60 | 1.55 | 52403 | None                                                    |
| 273 | 3rabA | 33 | 60 | 1.55 | 52592 | complexed with gnp, mg                                  |
| 274 | 1kssA | 33 | 60 | 1.55 | 48711 | complexed with fad, fum, hem, na; mutant                |
| 275 | 1bucA | 33 | 60 | 1.55 | 47204 | None                                                    |
| 276 | 1ekfA | 33 | 60 | 1.55 | 56753 | None                                                    |
| 277 | 1ndbA | 33 | 60 | 1.55 | 82424 | None                                                    |
| 278 | 1gosA | 33 | 60 | 1.55 | 51913 | None                                                    |
| 279 | 1lmeA | 33 | 60 | 1.55 | 56421 | None                                                    |
| 280 | 1jqeA | 33 | 60 | 1.55 | 75261 | None                                                    |
| 281 | 1k4tA | 33 | 60 | 1.55 | 46597 | complexed with hg, pg4, ptr, tgp, ttc, ttg              |
| 282 | 1cc1L | 33 | 60 | 1.55 | 56763 | complexed with cse, fco, fe2, fs4, h2s, ni              |
| 283 | 1ixdA | 33 | 60 | 1.55 | 74925 | None                                                    |
| 284 | 1howA | 33 | 60 | 1.55 | 88854 | residues 305-538 were deleted and replaced with Val-Asp |
| 285 | 1d2nA | 33 | 60 | 1.55 | 81269 | complexed with anp, gol, mg                             |
| 286 | 1mt5A | 33 | 60 | 1.55 | 75305 | None                                                    |
| 287 | 1b8oA | 33 | 60 | 1.55 | 53168 | complexed with imh, mg, po4                             |
| 288 | 1lla  | 33 | 60 | 1.55 | 48051 | complexed with cl, cu, na                               |
| 289 | 1aqe  | 33 | 60 | 1.55 | 48696 | complexed with hem, so4; mutant                         |
| 290 | 1m6iA | 33 | 60 | 1.55 | 51943 | None                                                    |
| 291 | 1ou5A | 33 | 60 | 1.55 | 81892 | None                                                    |
| 292 | 1h6dA | 33 | 60 | 1.55 | 51800 | None                                                    |
| 293 | 1gy8A | 33 | 60 | 1.55 | 51751 | None                                                    |
| 294 | 1e7lA | 33 | 60 | 1.55 | 68919 | None                                                    |
| 295 | 1lxnA | 33 | 60 | 1.55 | 89958 | None                                                    |
| 296 | 1j18A | 33 | 60 | 1.55 | 49453 | complexed with acy, ca, glc, so4                        |
| 297 | 1ofdA | 33 | 60 | 1.55 | 69337 | None                                                    |
| 298 | 1ewqA | 33 | 60 | 1.55 | 48335 | None                                                    |
| 299 | 1h6vA | 33 | 60 | 1.55 | 51943 | None                                                    |
| 300 | 1qhoA | 33 | 60 | 1.55 | 81282 | complexed with abd, ca, mal, so4                        |
| 301 | 1k4zA | 33 | 60 | 1.55 | 69341 | None                                                    |
| 302 | 3thiA | 33 | 60 | 1.55 | 53851 | complexed with so4                                      |
| 303 | 1hbnA | 33 | 60 | 1.55 | 48082 | None                                                    |
| 304 | 1ky9A | 33 | 60 | 1.55 | 74933 | None                                                    |
| 305 | 1k6yA | 33 | 60 | 1.55 | 46920 | None                                                    |
| 306 | 1jtgB | 33 | 60 | 1.55 | 55649 | None                                                    |
| 307 | 1ufhA | 33 | 60 | 1.55 | 55730 | None                                                    |
| 308 | 1dg6A | 33 | 60 | 1.55 | 49843 | None                                                    |
| 309 | 1oahA | 33 | 60 | 1.55 | 48711 | None                                                    |
| 310 | 1io1A | 33 | 60 | 1.55 | 64519 | mutant                                                  |
| 311 | 1c8bA | 33 | 60 | 1.55 | 64095 | None                                                    |
| 312 | 1kzkA | 33 | 60 | 1.55 | 50631 | None                                                    |
| 313 | 1omwA | 33 | 60 | 1.55 | 48098 | complexed with cmt; mutant                              |

|     |       |    |    |      |       |                                                                       |
|-----|-------|----|----|------|-------|-----------------------------------------------------------------------|
| 314 | 1n8yC | 33 | 60 | 1.55 | 52071 | None                                                                  |
| 315 | 1csh  | 33 | 60 | 1.55 | 48257 | complexed with amx, oaa                                               |
| 316 | 1e1oA | 33 | 60 | 1.55 | 50250 | complexed with gol, lys                                               |
| 317 | 1qnxA | 33 | 60 | 1.55 | 55798 | complexed with na                                                     |
| 318 | 1oc7A | 33 | 60 | 1.55 | 51990 | complexed with act, bgc, dmf, gol, ma3, mg, nag, sgc; mutant          |
| 319 | 1k87A | 33 | 60 | 1.55 | 81936 | complexed with 1pe, fad, gol, lac, trs                                |
| 320 | 1e9xA | 33 | 60 | 1.55 | 48265 | complexed with hem, pim; mutant                                       |
| 321 | 1fh6A | 33 | 60 | 1.55 | 56564 | None                                                                  |
| 322 | 1uok  | 33 | 60 | 1.55 | 51012 | None                                                                  |
| 323 | 1pfaA | 33 | 60 | 1.55 | 53785 | None                                                                  |
| 324 | 1fftA | 33 | 60 | 1.55 | 81441 | None                                                                  |
| 325 | 1mqsA | 33 | 60 | 1.55 | 56816 | complexed with an N-terminal peptide of sed5p, chain B                |
| 326 | 1qmeA | 33 | 60 | 1.55 | 54185 | None                                                                  |
| 327 | 1jfaA | 33 | 60 | 1.55 | 69113 | None                                                                  |
| 328 | 1kbeA | 33 | 60 | 1.55 | 57890 | complexed with zn                                                     |
| 329 | 1kl7A | 33 | 60 | 1.55 | 53687 | None                                                                  |
| 330 | 1oxwA | 33 | 60 | 1.55 | 89729 | None                                                                  |
| 331 | 1de4C | 33 | 60 | 1.55 | 47673 | None                                                                  |
| 332 | 1m6sA | 33 | 60 | 1.55 | 53384 | None                                                                  |
| 333 | 1knzA | 33 | 60 | 1.55 | 69904 | None                                                                  |
| 334 | 1gvhA | 33 | 60 | 1.55 | 46463 | complexed with cl, fad, hem, na                                       |
| 335 | 1jj2K | 33 | 60 | 1.55 | 52081 | complexed with cd, cl, k, mg, na                                      |
| 336 | 1gph1 | 33 | 60 | 1.55 | 53272 | None                                                                  |
| 337 | 1gph1 | 33 | 60 | 1.55 | 53272 | None                                                                  |
| 338 | 1mi1A | 33 | 60 | 1.55 | 81838 | None                                                                  |
| 339 | 1efvB | 33 | 60 | 1.55 | 52432 | complexed with amp, fad                                               |
| 340 | 1efvB | 33 | 60 | 1.55 | 52432 | complexed with amp, fad                                               |
| 341 | 1e3mA | 33 | 60 | 1.55 | 48335 | None                                                                  |
| 342 | 2shpA | 33 | 60 | 1.55 | 52805 | None                                                                  |
| 343 | 1kbiA | 33 | 60 | 1.55 | 51396 | complexed with fmn, hem, mpd, po4, pyr                                |
| 344 | 1ni4B | 33 | 60 | 1.55 | 88741 | None                                                                  |
| 345 | 1g9lA | 33 | 60 | 1.55 | 63571 | None                                                                  |
| 346 | 1h3iA | 33 | 60 | 1.55 | 82186 | None                                                                  |
| 347 | 1jndA | 33 | 60 | 1.55 | 51534 | complexed with man, nag                                               |
| 348 | 1kmmA | 33 | 60 | 1.55 | 52955 | None                                                                  |
| 349 | 1htyA | 33 | 60 | 1.55 | 88693 | complexed with mpd, nag, trs, zn                                      |
| 350 | 1j6uA | 33 | 60 | 1.55 | 51985 | structural genomics                                                   |
| 351 | 1gvoA | 33 | 60 | 1.55 | 51396 | complexed with dnf, fmn                                               |
| 352 | 1fwxA | 33 | 60 | 1.55 | 63392 | None                                                                  |
| 353 | 1ld8B | 33 | 60 | 1.55 | 48246 | complexed with acy, fpp, suc, u49, zn                                 |
| 354 | 1klfA | 33 | 60 | 1.55 | 49355 | None                                                                  |
| 355 | 1he7A | 33 | 60 | 1.55 | 49159 | swapped N-terminal strand dimer; only one subunit is in the PDB entry |
| 356 | 1othA | 33 | 60 | 1.55 | 53672 | None                                                                  |
| 357 | 1rhs  | 33 | 60 | 1.55 | 52827 | None                                                                  |



|     |       |    |    |      |       |                                                                                    |
|-----|-------|----|----|------|-------|------------------------------------------------------------------------------------|
| 358 | 2ak3A | 32 | 57 | 1.58 | 52541 | None                                                                               |
| 359 | 1df0A | 32 | 57 | 1.58 | 63550 | mutant                                                                             |
| 360 | 1m4iA | 32 | 57 | 1.58 | 55730 | None                                                                               |
| 361 | 1ga8A | 32 | 57 | 1.58 | 53458 | complexed with del, mn, upf; mutant                                                |
| 362 | 1ga8A | 32 | 57 | 1.58 | 53458 | complexed with del, mn, upf; mutant                                                |
| 363 | 1m6nA | 32 | 57 | 1.58 | 81768 | complexed with so4                                                                 |
| 364 | 1o2dA | 32 | 57 | 1.58 | 69892 | None                                                                               |
| 365 | 1ocrF | 32 | 57 | 1.58 | 57818 | None                                                                               |
| 366 | 1iegA | 32 | 57 | 1.58 | 50790 | None                                                                               |
| 367 | 2mysA | 32 | 57 | 1.58 | 50085 | complexed with mg, mly, so4                                                        |
| 368 | 1noa  | 32 | 57 | 1.58 | 49320 | None                                                                               |
| 369 | 1gw5M | 32 | 57 | 1.58 | 49448 | complexed with ihp                                                                 |
| 370 | 1kv8A | 32 | 57 | 1.58 | 51375 | None                                                                               |
| 371 | 1li4A | 32 | 57 | 1.58 | 51830 | complexed with ipa, nah, noc                                                       |
| 372 | 1kepA | 32 | 57 | 1.58 | 51751 | None                                                                               |
| 373 | 1d5yA | 32 | 57 | 1.58 | 46759 | None                                                                               |
| 374 | 1f3lA | 32 | 57 | 1.58 | 53351 | complexed with sah                                                                 |
| 375 | 1aa6  | 32 | 57 | 1.58 | 50696 | complexed with 4mo, cse, fs4, mgd                                                  |
| 376 | 1i5zA | 32 | 57 | 1.58 | 46796 | None                                                                               |
| 377 | 1ca1  | 32 | 57 | 1.58 | 48538 | complexed with cd, zn                                                              |
| 378 | 1tubA | 32 | 57 | 1.58 | 52491 | complexed with gdp, gtp, txl                                                       |
| 379 | 1m7sA | 32 | 57 | 1.58 | 56635 | None                                                                               |
| 380 | 1gz5A | 32 | 57 | 1.58 | 82540 | None                                                                               |
| 381 | 1ky9B | 32 | 57 | 1.58 | 74933 | None                                                                               |
| 382 | 1az9  | 32 | 57 | 1.58 | 53093 | complexed with mn                                                                  |
| 383 | 1io7A | 32 | 57 | 1.58 | 48265 | None                                                                               |
| 384 | 1njka | 32 | 57 | 1.58 | 54638 | None                                                                               |
| 385 | 1ej5A | 32 | 57 | 1.58 | 47913 | the polyproline region in this domain has been replaced by a short flexible linker |
| 386 | 1h2kA | 32 | 57 | 1.58 | 82194 | complex with HIF-1 alpha fragment peptide                                          |
| 387 | 1nhp  | 32 | 57 | 1.58 | 51943 | None                                                                               |
| 388 | 1j0hA | 32 | 57 | 1.58 | 81282 | None                                                                               |
| 389 | 1j9lA | 32 | 57 | 1.58 | 64168 | None                                                                               |
| 390 | 1i1jA | 32 | 57 | 1.58 | 50045 | None                                                                               |
| 391 | 1h32A | 32 | 57 | 1.58 | 81677 | None                                                                               |
| 392 | 1jbwA | 32 | 57 | 1.58 | 53250 | complexed with acq, mg, tmf                                                        |
| 393 | 1gwiA | 32 | 57 | 1.58 | 48265 | None                                                                               |
| 394 | 1o1yA | 32 | 57 | 1.58 | 52318 | structural genomics                                                                |
| 395 | 1kb4B | 32 | 57 | 1.58 | 57721 | complexed with zn                                                                  |
| 396 | 1qlaA | 32 | 57 | 1.58 | 46978 | None                                                                               |
| 397 | 1ecrA | 32 | 57 | 1.58 | 56597 | protein/DNA complex                                                                |
| 398 | 1jmmA | 32 | 57 | 1.58 | 74915 | complexed with mse, na; mutant                                                     |
| 399 | 1ebdA | 32 | 57 | 1.58 | 51943 | None                                                                               |
| 400 | 1jkvA | 32 | 57 | 1.58 | 47253 | None                                                                               |
