# Supplementary material
Source: PubMed Central journal article supplement (PMC7126412)
Supplement: mmc6.pdf [file mmc6.pdf]

## Inferring the function of a “hypothetical” protein MJ0226 by searching the AS-TRAL dataset with an unbound form (1b78).

The Table presents a list of proteins (top 400) whose binding sites were recognized to be similar to the ANP binding site of the “hypothetical” protein MJ0226 (1b78). The query site is defined by the cavity that is in contact with the ANP molecule in the PDB complex 2mjp. The proteins are listed in order of decreasing similarity to the query binding site.

| Rank | PDB code | Match Score | t-score | p-value | SCOP Family | SCOP Remarks                     |
|------|----------|-------------|---------|---------|-------------|----------------------------------|
| 1    | 1b78A    | 100         | 143     | 0.02    | 52973       | None                             |
| 2    | 2mjpA    | 81          | 118     | 0.46    | 52973       | None                             |
| 3    | 1k7kA    | 40          | 66      | 1.39    | 52973       | complexed with mse               |
| 4    | 1ivwA    | 37          | 62      | 1.46    | 49999       | None                             |
| 5    | 1ax4A    | 36          | 60      | 1.49    | 53397       | None                             |
| 6    | 1uby     | 36          | 60      | 1.49    | 48577       | complexed with dma, mg; mutant   |
| 7    | 1befA    | 35          | 59      | 1.51    | 50596       | None                             |
| 8    | 1ktkE    | 35          | 59      | 1.51    | 48727       | None                             |
| 9    | 1hv8A    | 35          | 59      | 1.51    | 81268       | None                             |
| 10   | 1bgxT    | 35          | 59      | 1.51    | 47808       | None                             |
| 11   | 1a81A    | 35          | 59      | 1.51    | 55551       | None                             |
| 12   | 1pf4A    | 35          | 59      | 1.51    | 52686       | None                             |
| 13   | 1iw7D    | 35          | 59      | 1.51    | 64490       | None                             |
| 14   | 1lfpA    | 35          | 59      | 1.51    | 75626       | structural genomics              |
| 15   | 1d0nA    | 35          | 59      | 1.51    | 55754       | None                             |
| 16   | 1jqnA    | 35          | 59      | 1.51    | 51632       | complexed with asp, dco, mn      |
| 17   | 1ihuA    | 35          | 59      | 1.51    | 52652       | None                             |
| 18   | 1j6wA    | 35          | 59      | 1.51    | 64294       | None                             |
| 19   | 1nw1A    | 35          | 59      | 1.51    | 90040       | None                             |
| 20   | 1ly1A    | 34          | 58      | 1.53    | 52541       | complexed with so4               |
| 21   | 1a2vA    | 34          | 58      | 1.53    | 49999       | None                             |
| 22   | 1gsiA    | 34          | 58      | 1.53    | 52541       | complexed with act, mg, so4, tmp |
| 23   | 1ni4B    | 34          | 58      | 1.53    | 88741       | None                             |
| 24   | 3cyr     | 34          | 58      | 1.53    | 48696       | complexed with hem               |
| 25   | 1p30A    | 34          | 58      | 1.53    | 0           | None                             |
| 26   | 1kyqA    | 34          | 58      | 1.53    | 75110       | None                             |
| 27   | 1gvhA    | 34          | 58      | 1.53    | 46463       | complexed with cl, fad, hem, na  |
| 28   | 1h29A    | 34          | 58      | 1.53    | 48696       | None                             |
| 29   | 1ng7A    | 34          | 58      | 1.53    | 89044       | None                             |
| 30   | 1i78A    | 34          | 58      | 1.53    | 69918       | None                             |
| 31   | 2uagA    | 34          | 58      | 1.53    | 51985       | complexed with adp, mg, uma      |
| 32   | 1fepA    | 34          | 58      | 1.53    | 56948       | None                             |
| 33   | 1j1nA    | 34          | 58      | 1.53    | 53851       | None                             |
| 34   | 1jm6A    | 34          | 58      | 1.53    | 69013       | None                             |
| 35   | 1k3pA    | 34          | 58      | 1.53    | 48257       | None                             |
| 36   | 19hcA    | 34          | 58      | 1.53    | 48696       | None                             |
| 37   | 1hlb     | 34          | 58      | 1.53    | 46463       | complexed with hem               |
| 38   | 1oafA    | 34          | 58      | 1.53    | 48114       | complexed with asc, hem, na      |

|    |       |    |    |      |       |                                                                                                 |
|----|-------|----|----|------|-------|-------------------------------------------------------------------------------------------------|
| 39 | 1fs7A | 34 | 58 | 1.53 | 48711 | complexed with act, ca, hem, y1                                                                 |
| 40 | 1mk4A | 34 | 58 | 1.53 | 55730 | None                                                                                            |
| 41 | 1uxy  | 34 | 58 | 1.53 | 56184 | complexed with epu, fad; mutant                                                                 |
| 42 | 1mkeA | 34 | 58 | 1.53 | 50767 | pseudo complex: fusion protein with a WIP peptide (res. 1-25) and a linker peptide (res. 26-30) |
| 43 | 1i5zA | 34 | 58 | 1.53 | 46796 | None                                                                                            |
| 44 | 1h6kA | 34 | 58 | 1.53 | 48385 | None                                                                                            |
| 45 | 1lw7A | 34 | 58 | 1.53 | 52397 | complexed with mse, nad, so4                                                                    |
| 46 | 1i50A | 34 | 58 | 1.53 | 64485 | complexed with mn, zn                                                                           |
| 47 | 1itwA | 33 | 57 | 1.55 | 82526 | None                                                                                            |
| 48 | 1fgjA | 33 | 57 | 1.55 | 48711 | None                                                                                            |
| 49 | 1ojt  | 33 | 57 | 1.55 | 51943 | None                                                                                            |
| 50 | 1k9sA | 33 | 57 | 1.55 | 53168 | None                                                                                            |
| 51 | 1k24A | 33 | 57 | 1.55 | 75651 | complexed with 1pe, zn                                                                          |
| 52 | 1ikpA | 33 | 57 | 1.55 | 49962 | complexed with cl, na; mutant                                                                   |
| 53 | 1efvB | 33 | 57 | 1.55 | 52432 | complexed with amp, fad                                                                         |
| 54 | 1lldA | 33 | 57 | 1.55 | 51848 | None                                                                                            |
| 55 | 1pswA | 33 | 57 | 1.55 | 89784 | structural genomics                                                                             |
| 56 | 1lvl  | 33 | 57 | 1.55 | 51943 | None                                                                                            |
| 57 | 1iirA | 33 | 57 | 1.55 | 64178 | complexed with mg, so4                                                                          |
| 58 | 1n0uA | 33 | 57 | 1.55 | 50448 | complexed with so1                                                                              |
| 59 | 1mh9A | 33 | 57 | 1.55 | 82382 | complexed with mg, po4                                                                          |
| 60 | 1e3hA | 33 | 57 | 1.55 | 46916 | complexed with so4                                                                              |
| 61 | 1hm9A | 33 | 57 | 1.55 | 51171 | None                                                                                            |
| 62 | 1g8mA | 33 | 57 | 1.55 | 63971 | None                                                                                            |
| 63 | 1ivyA | 33 | 57 | 1.55 | 53499 | None                                                                                            |
| 64 | 1g5aA | 33 | 57 | 1.55 | 51012 | complexed with epe, na, trs                                                                     |
| 65 | 1fo4A | 33 | 57 | 1.55 | 47742 | None                                                                                            |
| 66 | 1qgwA | 33 | 57 | 1.55 | 56569 | None                                                                                            |
| 67 | 1jqgA | 33 | 57 | 1.55 | 53188 | complexed with zn                                                                               |
| 68 | 1k94A | 33 | 57 | 1.55 | 63550 | None                                                                                            |
| 69 | 1aye  | 33 | 57 | 1.55 | 53188 | procarboxypeptidase A2                                                                          |
| 70 | 1jqeA | 33 | 57 | 1.55 | 75261 | None                                                                                            |
| 71 | 1mukA | 33 | 57 | 1.55 | 56694 | None                                                                                            |
| 72 | 1a8p  | 33 | 57 | 1.55 | 63381 | complexed with fad                                                                              |
| 73 | 1nslA | 33 | 57 | 1.55 | 55730 | None                                                                                            |
| 74 | 1ocyA | 33 | 57 | 1.55 | 88875 | complexed with cit, so4, zn                                                                     |
| 75 | 1dfmA | 33 | 57 | 1.55 | 52993 | None                                                                                            |
| 76 | 1f20A | 33 | 57 | 1.55 | 50438 | complexed with fad, fnt, gol, nap                                                               |
| 77 | 1j6zA | 33 | 57 | 1.55 | 53068 | None                                                                                            |
| 78 | 1kk8A | 33 | 57 | 1.55 | 50085 | complexed with adp, bef, ca, gol, mg; mutant                                                    |
| 79 | 1rlr  | 33 | 57 | 1.55 | 48169 | None                                                                                            |
| 80 | 1ek6A | 33 | 57 | 1.55 | 51751 | None                                                                                            |
| 81 | 1nktA | 33 | 57 | 1.55 | 81768 | None                                                                                            |
| 82 | 1ka1A | 33 | 57 | 1.55 | 56656 | complexed with a3p, bme, ca, mg                                                                 |
| 83 | 1mpxA | 33 | 57 | 1.55 | 69222 | None                                                                                            |

|     |       |    |    |      |       |                                                  |
|-----|-------|----|----|------|-------|--------------------------------------------------|
| 84  | 153l  | 33 | 57 | 1.55 | 53987 | None                                             |
| 85  | 1qbkB | 33 | 57 | 1.55 | 48372 | complexed with gnp, mg                           |
| 86  | 1kv3A | 33 | 57 | 1.55 | 81289 | None                                             |
| 87  | 1n8fA | 33 | 57 | 1.55 | 51599 | None                                             |
| 88  | 1eulA | 33 | 57 | 1.55 | 81652 | complexed with ca                                |
| 89  | 1gky  | 33 | 57 | 1.55 | 52541 | complexed with 5gp, so4                          |
| 90  | 1gm5A | 33 | 57 | 1.55 | 69009 | complexed with adp, mg                           |
| 91  | 1j5sA | 33 | 57 | 1.55 | 75082 | None                                             |
| 92  | 1pvc1 | 33 | 57 | 1.55 | 88634 | complexed with myr, sph                          |
| 93  | 2sas  | 33 | 57 | 1.55 | 47502 | complexed with ca                                |
| 94  | 1e8gA | 33 | 57 | 1.55 | 55104 | None                                             |
| 95  | 1iq0A | 33 | 57 | 1.55 | 47324 | None                                             |
| 96  | 1n2eA | 33 | 57 | 1.55 | 63976 | None                                             |
| 97  | 1m1qA | 33 | 57 | 1.55 | 48711 | complexed with hem, sul                          |
| 98  | 1b35A | 33 | 57 | 1.55 | 88634 | None                                             |
| 99  | 1ejdA | 33 | 57 | 1.55 | 55209 | None                                             |
| 100 | 2ezi  | 33 | 57 | 1.55 | 46728 | None                                             |
| 101 | 1aqe  | 33 | 57 | 1.55 | 48696 | complexed with hem, so4; mutant                  |
| 102 | 1nstA | 33 | 57 | 1.55 | 52575 | complexed with a3p                               |
| 103 | 1mm4A | 33 | 57 | 1.55 | 82874 | mutant                                           |
| 104 | 1chmA | 33 | 57 | 1.55 | 53093 | None                                             |
| 105 | 2pii  | 33 | 57 | 1.55 | 54914 | None                                             |
| 106 | 1ehiA | 33 | 57 | 1.55 | 52452 | None                                             |
| 107 | 1nksA | 33 | 57 | 1.55 | 52541 | None                                             |
| 108 | 1nhp  | 33 | 57 | 1.55 | 51943 | None                                             |
| 109 | 1cl1A | 33 | 57 | 1.55 | 53402 | None                                             |
| 110 | 1ksfX | 33 | 57 | 1.55 | 81924 | complexed with adp, ioh, met, mg, pge;<br>mutant |
| 111 | 1bg1A | 33 | 57 | 1.55 | 47656 | protein/DNA complex                              |
| 112 | 1onfA | 33 | 57 | 1.55 | 51943 | None                                             |
| 113 | 1kssA | 33 | 57 | 1.55 | 48711 | complexed with fad, fum, hem, na; mu-<br>tant    |
| 114 | 1ez0A | 33 | 57 | 1.55 | 53721 | None                                             |
| 115 | 1dxy  | 33 | 57 | 1.55 | 51830 | complexed with coi, nad, so4                     |
| 116 | 1jc4A | 33 | 57 | 1.55 | 64257 | None                                             |
| 117 | 1ndbA | 33 | 57 | 1.55 | 82424 | None                                             |
| 118 | 1ct9A | 33 | 57 | 1.55 | 52403 | None                                             |
| 119 | 1iw7C | 33 | 57 | 1.55 | 64485 | None                                             |
| 120 | 1csh  | 33 | 57 | 1.55 | 48257 | complexed with amx, oaa                          |
| 121 | 1kepA | 33 | 57 | 1.55 | 51751 | None                                             |
| 122 | 1k2yX | 33 | 57 | 1.55 | 53739 | None                                             |
| 123 | 1qkiA | 33 | 57 | 1.55 | 51800 | None                                             |
| 124 | 1a9xA | 33 | 57 | 1.55 | 48109 | None                                             |
| 125 | 1gz5A | 33 | 57 | 1.55 | 82540 | None                                             |
| 126 | 1j0hA | 33 | 57 | 1.55 | 81282 | None                                             |
| 127 | 1n8lA | 33 | 57 | 1.55 | 47337 | None                                             |
| 128 | 1p16A | 33 | 57 | 1.55 | 50307 | None                                             |
| 129 | 1kapP | 33 | 57 | 1.55 | 51121 | complexed with ca, zn                            |

|     |       |    |    |      |       |                                                         |
|-----|-------|----|----|------|-------|---------------------------------------------------------|
| 130 | 1k8tA | 33 | 57 | 1.55 | 69887 | complexed with ni, so4                                  |
| 131 | 1gosA | 33 | 57 | 1.55 | 51913 | None                                                    |
| 132 | 1qo8A | 33 | 57 | 1.55 | 48711 | None                                                    |
| 133 | 1i50B | 33 | 57 | 1.55 | 64490 | complexed with mn, zn                                   |
| 134 | 1bzyA | 33 | 57 | 1.55 | 53272 | None                                                    |
| 135 | 1g9lA | 33 | 57 | 1.55 | 63571 | None                                                    |
| 136 | 1emsA | 33 | 57 | 1.55 | 54198 | None                                                    |
| 137 | 1ng2A | 33 | 57 | 1.55 | 50045 | None                                                    |
| 138 | 1jnrA | 33 | 57 | 1.55 | 46978 | None                                                    |
| 139 | 1j3kA | 33 | 57 | 1.55 | 53598 | None                                                    |
| 140 | 1h6gA | 33 | 57 | 1.55 | 47221 | None                                                    |
| 141 | 1hlwA | 33 | 57 | 1.55 | 54920 | mutant                                                  |
| 142 | 1d7qA | 33 | 57 | 1.55 | 50282 | None                                                    |
| 143 | 1dnpA | 33 | 57 | 1.55 | 48174 | None                                                    |
| 144 | 1e2kA | 33 | 57 | 1.55 | 52541 | None                                                    |
| 145 | 1oacA | 33 | 57 | 1.55 | 49999 | None                                                    |
| 146 | 1ja1A | 33 | 57 | 1.55 | 50438 | None                                                    |
| 147 | 1np7A | 33 | 57 | 1.55 | 48174 | None                                                    |
| 148 | 1oahA | 33 | 57 | 1.55 | 48711 | None                                                    |
| 149 | 1dzlA | 33 | 57 | 1.55 | 88649 | mutant                                                  |
| 150 | 7reqA | 33 | 57 | 1.55 | 51704 | None                                                    |
| 151 | 1bg2  | 33 | 57 | 1.55 | 52641 | complexed with act, adp, mg                             |
| 152 | 1nqeA | 33 | 57 | 1.55 | 56948 | complexed with c8e, mg                                  |
| 153 | 1hz4A | 33 | 57 | 1.55 | 69094 | complexed with bez, gol, so4                            |
| 154 | 1n40A | 32 | 55 | 1.58 | 48265 | atomic resolution structure                             |
| 155 | 1njka | 32 | 55 | 1.58 | 54638 | None                                                    |
| 156 | 1dgtB | 32 | 55 | 1.58 | 47786 | complexed with amp, zn                                  |
| 157 | 1gmeA | 32 | 55 | 1.58 | 49765 | None                                                    |
| 158 | 1ep0A | 32 | 55 | 1.58 | 51183 | None                                                    |
| 159 | 1lla  | 32 | 55 | 1.58 | 48051 | complexed with cl, cu, na                               |
| 160 | 1b5tA | 32 | 55 | 1.58 | 51731 | None                                                    |
| 161 | 1hyuA | 32 | 55 | 1.58 | 51943 | None                                                    |
| 162 | 1howA | 32 | 55 | 1.58 | 88854 | residues 305-538 were deleted and replaced with Val-Asp |
| 163 | 1k75A | 32 | 55 | 1.58 | 69602 | None                                                    |
| 164 | 1jjuA | 32 | 55 | 1.58 | 68956 | None                                                    |
| 165 | 1trb  | 32 | 55 | 1.58 | 51943 | None                                                    |
| 166 | 1nf5B | 32 | 55 | 1.58 | 53452 | None                                                    |
| 167 | 1kqpA | 32 | 55 | 1.58 | 52403 | None                                                    |
| 168 | 1mqsa | 32 | 55 | 1.58 | 56816 | complexed with an N-terminal peptide of sed5p, chain B  |
| 169 | 1g40A | 32 | 55 | 1.58 | 57536 | None                                                    |
| 170 | 1k9oI | 32 | 55 | 1.58 | 56575 | Michaelis serpin-trypsin complex                        |
| 171 | 1k4gA | 32 | 55 | 1.58 | 51714 | complexed with aiq, zn                                  |
| 172 | 1m1xB | 32 | 55 | 1.58 | 69180 | complexed with mn, nag                                  |
| 173 | 1qlaA | 32 | 55 | 1.58 | 46978 | None                                                    |
| 174 | 1dg6A | 32 | 55 | 1.58 | 49843 | None                                                    |
| 175 | 1aa6  | 32 | 55 | 1.58 | 50696 | complexed with 4mo, cse, fs4, mgd                       |

|     |       |    |    |      |       |                                                                       |
|-----|-------|----|----|------|-------|-----------------------------------------------------------------------|
| 176 | 1kcw  | 32 | 55 | 1.58 | 49550 | None                                                                  |
| 177 | 1lfo  | 32 | 55 | 1.58 | 50847 | complexed with ace, beo, ola, unx                                     |
| 178 | 1cjcA | 32 | 55 | 1.58 | 51906 | complexed with fad                                                    |
| 179 | 1g6oA | 32 | 55 | 1.58 | 52670 | None                                                                  |
| 180 | 1eybA | 32 | 55 | 1.58 | 51194 | None                                                                  |
| 181 | 1fkmA | 32 | 55 | 1.58 | 47924 | None                                                                  |
| 182 | 1e5dA | 32 | 55 | 1.58 | 52219 | None                                                                  |
| 183 | 2mysA | 32 | 55 | 1.58 | 50085 | complexed with mg, mly, so4                                           |
| 184 | 1m3eA | 32 | 55 | 1.58 | 74656 | None                                                                  |
| 185 | 1kbiA | 32 | 55 | 1.58 | 51396 | complexed with fmm, hem, mpd, po4,<br>pyr                             |
| 186 | 1hms  | 32 | 55 | 1.58 | 50847 | complexed with ola                                                    |
| 187 | 1ff2A | 32 | 55 | 1.58 | 51943 | None                                                                  |
| 188 | 1p35A | 32 | 55 | 1.58 | 49895 | None                                                                  |
| 189 | 1p3dA | 32 | 55 | 1.58 | 51985 | None                                                                  |
| 190 | 1i7oA | 32 | 55 | 1.58 | 56530 | None                                                                  |
| 191 | 1xvaA | 32 | 55 | 1.58 | 53348 | None                                                                  |
| 192 | 1byb  | 32 | 55 | 1.58 | 51446 | complexed with glc, so4                                               |
| 193 | 1cipA | 32 | 55 | 1.58 | 47896 | complexed with gnp, mg                                                |
| 194 | 1h6vA | 32 | 55 | 1.58 | 51943 | None                                                                  |
| 195 | 1ld8A | 32 | 55 | 1.58 | 48440 | complexed with acy, fpp, suc, u49, zn                                 |
| 196 | 1ca1  | 32 | 55 | 1.58 | 48538 | complexed with cd, zn                                                 |
| 197 | 1o14A | 32 | 55 | 1.58 | 53614 | None                                                                  |
| 198 | 1ffyA | 32 | 55 | 1.58 | 47324 | protein/RNA complex; complexed<br>with k, mo2, mo4, mo5, mo6, mrc, zn |
| 199 | 1n4kA | 32 | 55 | 1.58 | 81895 | complexed with i3p                                                    |
| 200 | 1e3mA | 32 | 55 | 1.58 | 48335 | None                                                                  |
| 201 | 1d9nA | 32 | 55 | 1.58 | 54178 | None                                                                  |
| 202 | 3btaA | 32 | 55 | 1.58 | 49956 | complexed with zn                                                     |
| 203 | 1n8vA | 32 | 55 | 1.58 | 81898 | None                                                                  |
| 204 | 1hw6A | 32 | 55 | 1.58 | 51431 | complexed with cl, mg                                                 |
| 205 | 1mv8A | 32 | 55 | 1.58 | 48191 | None                                                                  |
| 206 | 1k0mA | 32 | 55 | 1.58 | 47617 | None                                                                  |
| 207 | 1o75A | 32 | 55 | 1.58 | 81987 | None                                                                  |
| 208 | 1kxbA | 32 | 55 | 1.58 | 53796 | complexed with act, edo, gto, mn                                      |
| 209 | 1bif  | 32 | 55 | 1.58 | 52589 | complexed with atg, gol, mg, po4; mutant                              |
| 210 | 1a6dA | 32 | 55 | 1.58 | 48596 | None                                                                  |
| 211 | 3caoA | 32 | 55 | 1.58 | 48696 | complexed with ars, cgn, hem, zn                                      |
| 212 | 1omwA | 32 | 55 | 1.58 | 48098 | complexed with cmt; mutant                                            |
| 213 | 1h5qA | 32 | 55 | 1.58 | 51751 | None                                                                  |
| 214 | 1knvA | 32 | 55 | 1.58 | 52999 | None                                                                  |
| 215 | 1qj5A | 32 | 55 | 1.58 | 53417 | None                                                                  |
| 216 | 1h5wA | 32 | 55 | 1.58 | 56827 | None                                                                  |
| 217 | 1hynP | 32 | 55 | 1.58 | 64362 | None                                                                  |
| 218 | 1m53A | 32 | 55 | 1.58 | 51012 | None                                                                  |
| 219 | 1k6wA | 32 | 55 | 1.58 | 69373 | complexed with fe                                                     |
| 220 | 1ezfA | 32 | 55 | 1.58 | 48580 | None                                                                  |

|     |       |    |    |      |       |                                                                                 |
|-----|-------|----|----|------|-------|---------------------------------------------------------------------------------|
| 221 | 1i6lA | 32 | 55 | 1.58 | 52375 | complexed with gol, nh4, so4, tym                                               |
| 222 | 1a49A | 32 | 55 | 1.58 | 50801 | None                                                                            |
| 223 | 1slm  | 32 | 55 | 1.58 | 63427 | complexed with ca, zn                                                           |
| 224 | 1gweA | 32 | 55 | 1.58 | 56635 | complexed with hem, so4                                                         |
| 225 | 1gyhA | 32 | 55 | 1.58 | 75006 | None                                                                            |
| 226 | 1l0gA | 32 | 55 | 1.58 | 56602 | None                                                                            |
| 227 | 1o0sA | 32 | 55 | 1.58 | 51883 | None                                                                            |
| 228 | 1n7oA | 32 | 55 | 1.58 | 48234 | mutant                                                                          |
| 229 | 1k28A | 32 | 55 | 1.58 | 69256 | complexed with k, po4                                                           |
| 230 | 1cz4A | 32 | 55 | 1.58 | 50708 | None                                                                            |
| 231 | 1l5jA | 32 | 55 | 1.58 | 74779 | None                                                                            |
| 232 | 1ocrF | 32 | 55 | 1.58 | 57818 | None                                                                            |
| 233 | 1oxwA | 32 | 55 | 1.58 | 89729 | None                                                                            |
| 234 | 1odmA | 32 | 55 | 1.58 | 51198 | complexed with asv, fe2, so4                                                    |
| 235 | 1a8i  | 32 | 55 | 1.58 | 53766 | complexed with gls                                                              |
| 236 | 3grs  | 32 | 55 | 1.58 | 51943 | None                                                                            |
| 237 | 1c8bA | 32 | 55 | 1.58 | 64095 | None                                                                            |
| 238 | 2pia  | 32 | 55 | 1.58 | 63381 | complexed with fes, fmn                                                         |
| 239 | 1dl6A | 32 | 55 | 1.58 | 57784 | complexed with zn                                                               |
| 240 | 1d2pA | 32 | 55 | 1.58 | 49479 | None                                                                            |
| 241 | 1e9xA | 32 | 55 | 1.58 | 48265 | complexed with hem, pim; mutant                                                 |
| 242 | 3aky  | 32 | 55 | 1.58 | 52541 | complexed with ap5, imd; mutant                                                 |
| 243 | 1by5A | 32 | 55 | 1.58 | 56948 | complexed with c8e, fe, orn                                                     |
| 244 | 1kk6A | 32 | 55 | 1.58 | 51168 | None                                                                            |
| 245 | 2cy3  | 32 | 55 | 1.58 | 48696 | complexed with hem                                                              |
| 246 | 1l1lA | 32 | 55 | 1.58 | 75131 | None                                                                            |
| 247 | 1d8cA | 32 | 55 | 1.58 | 51646 | None                                                                            |
| 248 | 1cq3A | 32 | 55 | 1.58 | 49890 | None                                                                            |
| 249 | 1ufhA | 32 | 55 | 1.58 | 55730 | None                                                                            |
| 250 | 1ciy  | 32 | 55 | 1.58 | 49796 | None                                                                            |
| 251 | 1bjbA | 32 | 55 | 1.58 | 49159 | a single-chain construct with epsilon chain domain, includes part of the linker |
| 252 | 1t7pA | 32 | 55 | 1.58 | 53118 | protein/DNA complex; complexed with 2da, dg3, mg; mutant                        |
| 253 | 1kmoA | 32 | 55 | 1.58 | 56948 | complexed with hto, lda                                                         |
| 254 | 1hr6B | 32 | 55 | 1.58 | 63412 | None                                                                            |
| 255 | 1g5bA | 32 | 55 | 1.58 | 56310 | None                                                                            |
| 256 | 1cgmE | 32 | 55 | 1.58 | 47196 | None                                                                            |
| 257 | 1htyA | 32 | 55 | 1.58 | 88693 | complexed with mpd, nag, trs, zn                                                |
| 258 | 1jr7A | 32 | 55 | 1.58 | 63855 | complexed with fe2                                                              |
| 259 | 1c8uA | 32 | 55 | 1.58 | 54644 | None                                                                            |
| 260 | 1k28D | 32 | 55 | 1.58 | 69280 | None                                                                            |
| 261 | 1f3lA | 32 | 55 | 1.58 | 53351 | complexed with sah                                                              |
| 262 | 1gvoA | 32 | 55 | 1.58 | 51396 | complexed with dnf, fmn                                                         |
| 263 | 1jj2B | 32 | 55 | 1.58 | 50461 | complexed with cd, cl, k, mg, na                                                |
| 264 | 1jeyA | 32 | 55 | 1.58 | 64502 | None                                                                            |
| 265 | 1cii  | 32 | 55 | 1.58 | 56838 | None                                                                            |

|     |       |    |    |      |       |                                        |
|-----|-------|----|----|------|-------|----------------------------------------|
| 266 | 1ky9B | 32 | 55 | 1.58 | 74933 | None                                   |
| 267 | 1zakA | 32 | 55 | 1.58 | 52541 | None                                   |
| 268 | 1k8kA | 32 | 55 | 1.58 | 53068 | None                                   |
| 269 | 1hhsA | 32 | 55 | 1.58 | 64480 | None                                   |
| 270 | 1f0lA | 32 | 55 | 1.58 | 49381 | None                                   |
| 271 | 1gyoA | 32 | 55 | 1.58 | 48696 | None                                   |
| 272 | 1m1nB | 32 | 55 | 1.58 | 53816 | None                                   |
| 273 | 1epwA | 32 | 55 | 1.58 | 49956 | complexed with so4, zn                 |
| 274 | 1cydA | 32 | 55 | 1.58 | 51751 | None                                   |
| 275 | 1bf6A | 32 | 55 | 1.58 | 51564 | None                                   |
| 276 | 2dpmA | 32 | 55 | 1.58 | 88788 | complexed with hg, sam                 |
| 277 | 1f8rA | 32 | 55 | 1.58 | 51913 | None                                   |
| 278 | 1c8zA | 32 | 55 | 1.58 | 54519 | None                                   |
| 279 | 3ladA | 32 | 55 | 1.58 | 51943 | None                                   |
| 280 | 1kblA | 32 | 55 | 1.58 | 51629 | complexed with nh4, so4                |
| 281 | 1hyhA | 32 | 55 | 1.58 | 51848 | None                                   |
| 282 | 1rypC | 32 | 55 | 1.58 | 56251 | None                                   |
| 283 | 1n5uA | 32 | 55 | 1.58 | 48553 | None                                   |
| 284 | 1lehA | 32 | 55 | 1.58 | 51883 | None                                   |
| 285 | 1gp6A | 32 | 55 | 1.58 | 51198 | complexed with dh2, fe2, mes, que, sin |
| 286 | 1oaa  | 32 | 55 | 1.58 | 51751 | complexed with nap, oaa, so4           |
| 287 | 4fiv  | 32 | 55 | 1.58 | 50631 | complexed with 1ni                     |
| 288 | 1esmA | 32 | 55 | 1.58 | 52584 | None                                   |
| 289 | 1lshA | 32 | 55 | 1.58 | 48432 | complexed with pca, pld, upl           |
| 290 | 1lkxA | 32 | 55 | 1.58 | 52641 | None                                   |
| 291 | 1fohA | 32 | 55 | 1.58 | 51913 | None                                   |
| 292 | 1gkuB | 32 | 55 | 1.58 | 69496 | None                                   |
| 293 | 1dquA | 32 | 55 | 1.58 | 88704 | None                                   |
| 294 | 1dnv  | 32 | 55 | 1.58 | 88647 | None                                   |
| 295 | 1pda  | 32 | 55 | 1.58 | 53851 | complexed with acy, dpm                |
| 296 | 1poxA | 32 | 55 | 1.58 | 52475 | None                                   |
| 297 | 1dekA | 32 | 55 | 1.58 | 52541 | None                                   |
| 298 | 1inp  | 32 | 55 | 1.58 | 56656 | complexed with mg                      |
| 299 | 1qkrA | 32 | 55 | 1.58 | 47221 | None                                   |
| 300 | 1m6iA | 32 | 55 | 1.58 | 51943 | None                                   |
| 301 | 1d2oA | 32 | 55 | 1.58 | 49479 | None                                   |
| 302 | 1kmmA | 32 | 55 | 1.58 | 52955 | None                                   |
| 303 | 1hsjA | 32 | 55 | 1.58 | 63379 | None                                   |
| 304 | 1gegA | 32 | 55 | 1.58 | 51751 | None                                   |
| 305 | 1nijA | 32 | 55 | 1.58 | 52652 | CASP5                                  |
| 306 | 1jehA | 32 | 55 | 1.58 | 51943 | None                                   |
| 307 | 1kjuA | 32 | 55 | 1.58 | 50045 | complexed with so4                     |
| 308 | 1kn0A | 32 | 55 | 1.58 | 82645 | None                                   |
| 309 | 1fsgA | 32 | 55 | 1.58 | 53272 | None                                   |
| 310 | 1e79A | 32 | 55 | 1.58 | 47918 | None                                   |
| 311 | 1iatA | 32 | 55 | 1.58 | 53701 | complexed with bme, sul                |
| 312 | 1c8dA | 32 | 55 | 1.58 | 88646 | complexed with ca                      |
| 313 | 1jj2N | 32 | 55 | 1.58 | 52081 | complexed with cd, cl, k, mg, na       |

|     |       |    |    |      |       |                                                                    |
|-----|-------|----|----|------|-------|--------------------------------------------------------------------|
| 314 | 1ni3A | 32 | 55 | 1.58 | 52592 | complexed with mse, so4                                            |
| 315 | 1kcmA | 32 | 55 | 1.58 | 64388 | None                                                               |
| 316 | 1jalA | 32 | 55 | 1.58 | 52592 | None                                                               |
| 317 | 1egaA | 32 | 55 | 1.58 | 52592 | None                                                               |
| 318 | 1gteA | 32 | 55 | 1.58 | 46553 | None                                                               |
| 319 | 1fm0E | 32 | 55 | 1.58 | 54691 | complexed with Moad                                                |
| 320 | 1gx5A | 32 | 55 | 1.58 | 56694 | complexed with gtp, mn, mse                                        |
| 321 | 1mioB | 32 | 55 | 1.58 | 53816 | None                                                               |
| 322 | 1mo9A | 32 | 55 | 1.58 | 51943 | None                                                               |
| 323 | 1hjxA | 32 | 55 | 1.58 | 51534 | None                                                               |
| 324 | 1jeqA | 32 | 55 | 1.58 | 68907 | None                                                               |
| 325 | 1kkhA | 32 | 55 | 1.58 | 54232 | complexed with dio                                                 |
| 326 | 1k8kD | 32 | 55 | 1.58 | 69646 | None                                                               |
| 327 | 1eqgA | 32 | 55 | 1.58 | 48132 | None                                                               |
| 328 | 1eqgA | 32 | 55 | 1.58 | 48132 | None                                                               |
| 329 | 1qnf  | 32 | 55 | 1.58 | 48174 | complexed with fad, hdf                                            |
| 330 | 1cc1L | 32 | 55 | 1.58 | 56763 | complexed with cse, fco, fe2, fs4, h2s, ni                         |
| 331 | 1kzhA | 32 | 55 | 1.58 | 53785 | None                                                               |
| 332 | 1oc7A | 32 | 55 | 1.58 | 51990 | complexed with act, bgc, dmf, gol, ma3, mg, nag, sgc; mutant       |
| 333 | 1iqrA | 32 | 55 | 1.58 | 48174 | complexed with fad, po4                                            |
| 334 | 1gskA | 32 | 55 | 1.58 | 49550 | None                                                               |
| 335 | 1j0mA | 32 | 55 | 1.58 | 48234 | complexed with ca                                                  |
| 336 | 1j18A | 32 | 55 | 1.58 | 49453 | complexed with acy, ca, glc, so4                                   |
| 337 | 1eu1A | 32 | 55 | 1.58 | 50696 | complexed with 6mo, cd, epe, glc, mgd, ox, so4                     |
| 338 | 1n7dA | 32 | 55 | 1.58 | 63826 | complexed with ca, keg, man, nag; mutant                           |
| 339 | 1a3wA | 32 | 55 | 1.58 | 50801 | None                                                               |
| 340 | 1qovL | 32 | 55 | 1.58 | 81482 | None                                                               |
| 341 | 1o6lA | 32 | 55 | 1.58 | 88854 | complexed with anp, mn, tpo; mutant                                |
| 342 | 3thiA | 32 | 55 | 1.58 | 53851 | complexed with so4                                                 |
| 343 | 1gpuA | 32 | 55 | 1.58 | 88735 | None                                                               |
| 344 | 1ekfA | 32 | 55 | 1.58 | 56753 | None                                                               |
| 345 | 1m6nA | 32 | 55 | 1.58 | 81768 | complexed with so4                                                 |
| 346 | 1aky  | 32 | 55 | 1.58 | 52541 | complexed with ap5, imd                                            |
| 347 | 1fwxA | 32 | 55 | 1.58 | 63392 | None                                                               |
| 348 | 1qp8A | 32 | 55 | 1.58 | 51830 | None                                                               |
| 349 | 1dxrH | 32 | 55 | 1.58 | 50347 | complexed with bcb, bpb, fe2, hec, lda, mq9, mst, ns5, so4; mutant |
| 350 | 5eau  | 32 | 55 | 1.58 | 48240 | complexed with fff, mg; mutant                                     |
| 351 | 1fnnA | 32 | 55 | 1.58 | 46819 | None                                                               |
| 352 | 1jidA | 32 | 55 | 1.58 | 69696 | complexed with a23, bro, mo3; mutant                               |
| 353 | 1ddf  | 32 | 55 | 1.58 | 81312 | None                                                               |
| 354 | 1nfp  | 32 | 55 | 1.58 | 51683 | complexed with fmn, myr, so4                                       |
| 355 | 1fzpB | 32 | 55 | 1.58 | 63379 | protein/DNA complex; complexed with ca                             |



|     |       |    |    |      |       |                                                                                                                         |
|-----|-------|----|----|------|-------|-------------------------------------------------------------------------------------------------------------------------|
| 356 | 1mswD | 32 | 55 | 1.58 | 56691 | elongation complex; shows dramatic conformational changes in the transition from initiation to elongation transcription |
| 357 | 1jbwA | 32 | 55 | 1.58 | 53250 | complexed with acq, mg, tmf                                                                                             |
| 358 | 1oyb  | 32 | 55 | 1.58 | 51396 | complexed with fmn, hba                                                                                                 |
| 359 | 1i50I | 32 | 55 | 1.58 | 57784 | None                                                                                                                    |
| 360 | 1k32A | 32 | 55 | 1.58 | 68933 | None                                                                                                                    |
| 361 | 1ou5A | 32 | 55 | 1.58 | 81892 | None                                                                                                                    |
| 362 | 1qm9A | 32 | 55 | 1.58 | 54929 | None                                                                                                                    |
| 363 | 1m2kA | 32 | 55 | 1.58 | 63984 | complexed with apr, zn; mutant                                                                                          |
| 364 | 1qaxA | 32 | 55 | 1.58 | 55036 | None                                                                                                                    |
| 365 | 1nekA | 32 | 55 | 1.58 | 46978 | complexed with ca, cdn, eph, f3s, fad, fes, fs4, hem, oaa, uq2                                                          |
| 366 | 1a7j  | 32 | 55 | 1.58 | 52584 | complexed with so4                                                                                                      |
| 367 | 1d09B | 32 | 55 | 1.58 | 54894 | None                                                                                                                    |
| 368 | 4bcl  | 32 | 55 | 1.58 | 51082 | complexed with bcl                                                                                                      |
| 369 | 2shpA | 32 | 55 | 1.58 | 52805 | None                                                                                                                    |
| 370 | 1nbaA | 32 | 55 | 1.58 | 52500 | None                                                                                                                    |
| 371 | 1qksA | 32 | 55 | 1.58 | 46671 | None                                                                                                                    |
| 372 | 1ji6A | 32 | 55 | 1.58 | 49796 | None                                                                                                                    |
| 373 | 1aqcA | 32 | 55 | 1.58 | 50755 | None                                                                                                                    |
| 374 | 1ezvB | 32 | 55 | 1.58 | 63412 | None                                                                                                                    |
| 375 | 1d0cA | 32 | 55 | 1.58 | 56513 | None                                                                                                                    |
| 376 | 1fknA | 32 | 55 | 1.58 | 50646 | None                                                                                                                    |
| 377 | 1e6uA | 32 | 55 | 1.58 | 51751 | complexed with nap, so4, trs, uvw                                                                                       |
| 378 | 1jfaA | 32 | 55 | 1.58 | 69113 | None                                                                                                                    |
| 379 | 1i8oA | 32 | 55 | 1.58 | 46627 | complexed with hec, nh3, sul                                                                                            |
| 380 | 1ih7A | 32 | 55 | 1.58 | 53118 | complexed with gmp, k                                                                                                   |
| 381 | 1obdA | 32 | 55 | 1.58 | 56105 | complexed with ace, amp, atp, mg, so4                                                                                   |
| 382 | 1m6sA | 32 | 55 | 1.58 | 53384 | None                                                                                                                    |
| 383 | 1f89A | 32 | 55 | 1.58 | 56318 | None                                                                                                                    |
| 384 | 1jnrB | 32 | 55 | 1.58 | 54884 | None                                                                                                                    |
| 385 | 1fbnA | 32 | 55 | 1.58 | 53342 | structural genomics                                                                                                     |
| 386 | 1l0lB | 32 | 55 | 1.58 | 63412 | None                                                                                                                    |
| 387 | 1jyoE | 32 | 55 | 1.58 | 69868 | None                                                                                                                    |
| 388 | 1c0aA | 32 | 55 | 1.58 | 50250 | None                                                                                                                    |
| 389 | 1m1cA | 31 | 54 | 1.60 | 82857 | None                                                                                                                    |
| 390 | 1mwvA | 31 | 54 | 1.60 | 74753 | None                                                                                                                    |
| 391 | 1i7pA | 31 | 54 | 1.60 | 63381 | complexed with fad                                                                                                      |
| 392 | 1eny  | 31 | 54 | 1.60 | 51751 | complexed with nad                                                                                                      |
| 393 | 1cvuA | 31 | 54 | 1.60 | 48132 | None                                                                                                                    |
| 394 | 3gcb  | 31 | 54 | 1.60 | 54002 | complexed with gol, so4; mutant                                                                                         |
| 395 | 6mhtA | 31 | 54 | 1.60 | 88786 | protein/DNA complex; complexed with 4sc, 5mc, sam                                                                       |
| 396 | 1e58A | 31 | 54 | 1.60 | 53255 | complexed with cl, phs, so4; mutant                                                                                     |
| 397 | 1azsC | 31 | 54 | 1.60 | 47896 | complexed with fkp, gsp, mg; mutant                                                                                     |
| 398 | 1ltzA | 31 | 54 | 1.60 | 56535 | complexed with cl, fe, hbl                                                                                              |

|     |       |    |    |      |       |                              |
|-----|-------|----|----|------|-------|------------------------------|
| 399 | 1tubB | 31 | 54 | 1.60 | 52491 | complexed with gdp, gtp, txl |
| 400 | 1e6tA | 31 | 54 | 1.60 | 55406 | None                         |
